# Supplementary material for: Circulating miR-16-5p, miR-92a-3p, and miR-451a in Plasma from Lung Cancer Patients: Potential Application in Early Detection and a Regulatory Role in Tumorigenesis Pathways
Source: Cancers (Basel). 2020 Jul 27;12(8):2071. doi: 10.3390/cancers12082071 (PMC7465670; doi:10.3390/cancers12082071)
Supplement: Supplementary file 1 [file cancers-12-02071-s001.zip]

Archive with 11 entries (11 files):
- Figure S1.pdf
- Figure S2.jpg
- Figure S3.pptx
- Table S1.docx
- Table S2.docx
- Table S3.docx
- Table S4.docx
- Table S5.xlsx
- Table S6.xlsx
- Table S7.xlsx
- Table S8_Table S9_Table S10.docx
