# Supplementary material for: Circulating miR-16-5p, miR-92a-3p, and miR-451a in Plasma from Lung Cancer Patients: Potential Application in Early Detection and a Regulatory Role in Tumorigenesis Pathways
Source: Cancers (Basel). 2020 Jul 27;12(8):2071. doi: 10.3390/cancers12082071 (PMC7465670; doi:10.3390/cancers12082071)
Supplement: Supplementary file 1 [file cancers-12-02071-s001.zip › Table S5.xlsx]

## Sheet: miRNA_mRNA targets
miRNA	Target Gene	Expressed Normal Lung
hsa-miR-451a	ABCB1	Yes
hsa-miR-16-5p	ACVR2A	Yes
hsa-miR-451a	ADAM10	Yes
hsa-miR-16-5p	ADORA2A	Yes
hsa-miR-451a	AKT1	Yes
hsa-miR-16-5p	AKT3	Yes
hsa-miR-16-5p	APP	Yes
hsa-miR-16-5p	ARHGDIA	Yes
hsa-miR-92a-3p	ARID4B	Yes
hsa-miR-16-5p	ARL2	Yes
hsa-miR-16-5p	AXIN2	Yes
hsa-miR-16-5p	BACE1	Yes
hsa-miR-16-5p	BCL2	Yes
hsa-miR-451a	BCL2	Yes
hsa-miR-92a-3p	BCL2L11	Yes
hsa-miR-16-5p	BDNF	Yes
hsa-miR-16-5p	BIRC5	Yes
hsa-miR-16-5p	BMI1	Yes
hsa-miR-92a-3p	BMPR2	Yes
hsa-miR-16-5p	BRCA1	Yes
hsa-miR-451a	CAB39	Yes
hsa-miR-16-5p	CADM1	Yes
hsa-miR-16-5p	CAPRIN1	Yes
hsa-miR-92a-3p	CCL8	Yes
hsa-miR-16-5p	CCND1	Yes
hsa-miR-16-5p	CCND2	Yes
hsa-miR-16-5p	CCND3	Yes
hsa-miR-16-5p	CCNE1	Yes
hsa-miR-16-5p	CCNT2	Yes
hsa-miR-92a-3p	CD69	Yes
hsa-miR-92a-3p	CDH1	Yes
hsa-miR-16-5p	CDK6	Yes
hsa-miR-451a	CDKN2D	Yes
hsa-miR-16-5p	CDS2	Yes
hsa-miR-16-5p	CHEK1	Yes
hsa-miR-16-5p	CHUK	Yes
hsa-miR-16-5p	CLDN2	Yes
hsa-miR-92a-3p	CPEB2	Yes
hsa-miR-451a	CPNE3	Yes
hsa-miR-451a	DCBLD2	Yes
hsa-miR-92a-3p	DNMT1	Yes
hsa-miR-92a-3p	DUSP10	Yes
hsa-miR-92a-3p	ESR2	Yes
hsa-miR-92a-3p	FBXW7	Yes
hsa-miR-16-5p	FGF2	Yes
hsa-miR-16-5p	FGFR1	Yes
hsa-miR-16-5p	GLS2	Yes
hsa-miR-92a-3p	HDAC2	Yes
hsa-miR-16-5p	HDGF	Yes
hsa-miR-16-5p	HGF	Yes
hsa-miR-92a-3p	HIPK1	Yes
hsa-miR-92a-3p	HIPK3	Yes
hsa-miR-16-5p	HMGA1	Yes
hsa-miR-16-5p	HMGA2	Yes
hsa-miR-16-5p	IFNG	Yes
hsa-miR-16-5p	IGF1R	Yes
hsa-miR-451a	IKBKB	Yes
hsa-miR-92a-3p	IKZF1	Yes
hsa-miR-16-5p	IL12B	Yes
hsa-miR-451a	IL6	Yes
hsa-miR-451a	IL6R	Yes
hsa-miR-92a-3p	ITGA5	Yes
hsa-miR-92a-3p	KAT2B	Yes
hsa-miR-16-5p	KDR	Yes
hsa-miR-92a-3p	KLF2	Yes
hsa-miR-92a-3p	KLF4	Yes
hsa-miR-16-5p	KRAS	Yes
hsa-miR-92a-3p	LASP1	Yes
hsa-miR-92a-3p	MAP2K4	Yes
hsa-miR-451a	MAP3K1	Yes
hsa-miR-16-5p	MAP7	Yes
hsa-miR-451a	MAPK1	Yes
hsa-miR-92a-3p	MAPK8	Yes
hsa-miR-92a-3p	MAPRE1	Yes
hsa-miR-16-5p	METTL13	Yes
hsa-miR-451a	MIF	Yes
hsa-miR-451a	MMP2	Yes
hsa-miR-451a	MMP9	Yes
hsa-miR-16-5p	MTOR	Yes
hsa-miR-16-5p	MYB	Yes
hsa-miR-451a	MYC	Yes
hsa-miR-92a-3p	MYCBP2	Yes
hsa-miR-92a-3p	MYLIP	Yes
hsa-miR-16-5p	NCOR2	Yes
hsa-miR-16-5p	NCSTN	Yes
hsa-miR-92a-3p	NR1H4	Yes
hsa-miR-16-5p	OPRM1	Yes
hsa-miR-92a-3p	OSBPL2	Yes
hsa-miR-92a-3p	OSBPL8	Yes
hsa-miR-451a	OXTR	Yes
hsa-miR-92a-3p	PCGF5	Yes
hsa-miR-92a-3p	PHLPP1	Yes
hsa-miR-16-5p	PIM1	Yes
hsa-miR-16-5p	PPM1D	Yes
hsa-miR-16-5p	PRDM4	Yes
hsa-miR-92a-3p	PTEN	Yes
hsa-miR-16-5p	PTGS2	Yes
hsa-miR-16-5p	PURA	Yes
hsa-miR-451a	RAB14	Yes
hsa-miR-451a	RAB5A	Yes
hsa-miR-92a-3p	RAD21	Yes
hsa-miR-16-5p	RAF1	Yes
hsa-miR-16-5p	RECK	Yes
hsa-miR-92a-3p	RFFL	Yes
hsa-miR-92a-3p	RGS5	Yes
hsa-miR-16-5p	RICTOR	Yes
hsa-miR-16-5p	RPS6KB1	Yes
hsa-miR-92a-3p	SIRT1	Yes
hsa-miR-16-5p	SLC6A4	Yes
hsa-miR-16-5p	SOCS3	Yes
hsa-miR-92a-3p	SOCS5	Yes
hsa-miR-16-5p	SOX5	Yes
hsa-miR-16-5p	SOX6	Yes
hsa-miR-92a-3p	STAT3	Yes
hsa-miR-92a-3p	TGFBR2	Yes
hsa-miR-451a	TMED7	Yes
hsa-miR-16-5p	TP53	Yes
hsa-miR-92a-3p	TP63	Yes
hsa-miR-16-5p	TPPP3	Yes
hsa-miR-451a	TSC1	Yes
hsa-miR-16-5p	UCA1	Yes
hsa-miR-16-5p	UNG	Yes
hsa-miR-16-5p	VEGFA	Yes
hsa-miR-16-5p	WEE1	Yes
hsa-miR-16-5p	WNT3A	Yes
hsa-miR-16-5p	WNT4	Yes
hsa-miR-16-5p	YAP1	Yes
hsa-miR-16-5p	ZYX	Yes
