# Supplementary material for: Circulating miR-16-5p, miR-92a-3p, and miR-451a in Plasma from Lung Cancer Patients: Potential Application in Early Detection and a Regulatory Role in Tumorigenesis Pathways
Source: Cancers (Basel). 2020 Jul 27;12(8):2071. doi: 10.3390/cancers12082071 (PMC7465670; doi:10.3390/cancers12082071)
Supplement: Supplementary file 1 [file cancers-12-02071-s001.zip › Table S6.xlsx]

## Sheet: All data
LUAD						LUSC
Gene Symbol	Gene ID	Median (Tumor)	Median (Normal)	Log2(Fold Change)	adjp	Gene Symbol	Gene ID	Median (Tumor)	Median (Normal)	Log2(Fold Change)	adjp
AKT3	ENSG00000117020.16	3.59	16.23	-1.908	1.33e-108	AKT3	ENSG00000117020.16	4.28	16.435	-1.723	1.31e-58
AXIN2	ENSG00000168646.12	4.93	18.06	-1.684	6.12e-74	AXIN2	ENSG00000168646.12	2.96	18.2	-2.278	1.83e-116
BMPR2	ENSG00000204217.12	10.35	22.721	-1.063	2.68e-89	BMPR2	ENSG00000204217.12	8.47	22.25	-1.296	2.36e-102
CADM1	ENSG00000182985.16					CADM1	ENSG00000182985.16	10.575	31.25	-1.478	7.07e-50
CCND2	ENSG00000118971.7	6.74	17.349	-1.245	1.42e-73	CCND2	ENSG00000118971.7
CCND3	ENSG00000112576.12					CCND3	ENSG00000112576.12	37.36	125.139	-1.717	5.43e-107
CD69	ENSG00000110848.8	6.15	20.22	-1.569	1.14e-66	CD69	ENSG00000110848.8	3.62	22.374	-2.339	5.91e-103
CDKN2D	ENSG00000129355.6	7.97	23.681	-1.46	2.19e-77	CDKN2D	ENSG00000129355.6
HGF	ENSG00000019991.15	2.79	12.1	-1.789	2.41e-83	HGF	ENSG00000019991.15	1.295	12.975	-2.606	1.71e-141
TP63	ENSG00000073282.12					TP63	ENSG00000073282.12	123.635	0.51	6.367	3.36e-184
UNG	ENSG00000076248.10					UNG	ENSG00000076248.10	42.865	11.47	1.815	5.97e-172
FGFR1	ENSG00000077782.19	16.62	71.639	-2.044	1.36e-80	FGFR1	ENSG00000077782.19	19.58	72.899	-1.844	1.47e-49
IKBKB	ENSG00000104365.13					IKBKB	ENSG00000104365.13	24.68	55.301	-1.133	1.59e-35
SLC6A4	ENSG00000108576.9	0.1	33.739	-4.981	1.84e-187	SLC6A4	ENSG00000108576.9	0.165	32.788	-4.858	2.42e-174
KAT2B	ENSG00000114166.7	5.14	13.42	-1.232	9.07e-100	KAT2B	ENSG00000114166.7	3.54	13.07	-1.632	1.04e-144
RECK	ENSG00000122707.11	2.95	12.86	-1.811	1.27e-150	RECK	ENSG00000122707.11	2.58	13.085	-1.976	7.86e-161
KLF2	ENSG00000127528.5	10.84	77.648	-2.732	3.79e-127	KLF2	ENSG00000127528.5	4.335	78.045	-3.889	2.9e-204
KDR	ENSG00000128052.8	9.38	24.91	-1.32	2.48e-40	KDR	ENSG00000128052.8	3.28	24.73	-2.588	1.71e-171
RAF1	ENSG00000132155.11					RAF1	ENSG00000132155.11	37.825	78.294	-1.03	7.74e-72
SOX5	ENSG00000134532.15	0.34	1.7	-1.011	2.08e-104	SOX5	ENSG00000134532.15
MAP7	ENSG00000135525.18	13	5.19	1.177	1.7e-65	MAP7	ENSG00000135525.18	17.4	4.98	1.622	9.86e-108
KLF4	ENSG00000136826.14	10.55	87.997	-2.946	7.44e-132	KLF4	ENSG00000136826.14	24.365	88.159	-1.814	2.68e-58
HMGA1	ENSG00000137309.19	132.77	39.14	1.737	1.6e-93	HMGA1	ENSG00000137309.19	273.708	39.789	2.752	4.77e-191
RGS5	ENSG00000143248.12					RGS5	ENSG00000143248.12	14.24	33.011	-1.158	4.53e-51
HDGF	ENSG00000143321.18					HDGF	ENSG00000143321.18	288.094	134.191	1.097	1.55e-67
TPPP3	ENSG00000159713.10	25.86	82.389	-1.634	1.38e-35	TPPP3	ENSG00000159713.10	15.34	79.47	-2.3	1.51e-60
ZYX	ENSG00000159840.15	106.912	334.276	-1.635	5.16e-94	ZYX	ENSG00000159840.15	112.649	336.403	-1.57	5.08e-86
ITGA5	ENSG00000161638.10	30.751	141.17	-2.163	2.36e-91	ITGA5	ENSG00000161638.10	43.691	144.587	-1.704	3.72e-63
IKZF1	ENSG00000185811.16					IKZF1	ENSG00000185811.16	3.03	9.39	-1.366	6.85e-76
HDAC2	ENSG00000196591.11					HDAC2	ENSG00000196591.11	89.84	41.396	1.099	6.76e-87
MIF	ENSG00000240972.1	467.071	225.658	1.046	8.07e-63	MIF	ENSG00000240972.1	785.489	226.944	1.787	2.98e-99

## Sheet: Log2(FC)_adjp
	LUAD		LUSC
Gene Symbol	Log2(Fold Change)	adjp	Log2(Fold Change)	adjp
AKT3	-1.908	1.33e-108	-1.723	1.31e-58
AXIN2	-1.684	6.12e-74	-2.278	1.83e-116
BMPR2	-1.063	2.68e-89	-1.296	2.36e-102
CADM1	ND	ND	-1.478	7.07e-50
CCND2	-1.245	1.42e-73	ND	ND
CCND3	ND	ND	-1.717	5.43e-107
CD69	-1.569	1.14e-66	-2.339	5.91e-103
CDKN2D	-1.46	2.19e-77	ND	ND
HGF	-1.789	2.41e-83	-2.606	1.71e-141
TP63	ND	ND	6.367	3.36e-184
UNG	ND	ND	1.815	5.97e-172
FGFR1	-2.044	1.36e-80	-1.844	1.47e-49
IKBKB	ND	ND	-1.133	1.59e-35
SLC6A4	-4.981	1.84e-187	-4.858	2.42e-174
KAT2B	-1.232	9.07e-100	-1.632	1.04e-144
RECK	-1.811	1.27e-150	-1.976	7.86e-161
KLF2	-2.732	3.79e-127	-3.889	2.9e-204
KDR	-1.32	2.48e-40	-2.588	1.71e-171
RAF1	ND	ND	-1.03	7.74e-72
SOX5	-1.011	2.08e-104	ND	ND
MAP7	1.177	1.7e-65	1.622	9.86e-108
KLF4	-2.946	7.44e-132	-1.814	2.68e-58
HMGA1	1.737	1.6e-93	2.752	4.77e-191
RGS5	ND	ND	-1.158	4.53e-51
HDGF	ND	ND	1.097	1.55e-67
TPPP3	-1.634	1.38e-35	-2.3	1.51e-60
ZYX	-1.635	5.16e-94	-1.57	5.08e-86
ITGA5	-2.163	2.36e-91	-1.704	3.72e-63
IKZF1	ND	ND	-1.366	6.85e-76
HDAC2	ND	ND	1.099	6.76e-87
MIF	1.046	8.07e-63	1.787	2.98e-99

## Sheet: Log2(FC)
Gene Symbol	LUAD	LUSC
AKT3	-1.908	-1.723
AXIN2	-1.684	-2.278
BMPR2	-1.063	-1.296
CADM1	ND	-1.478
CCND2	-1.245	ND
CCND3	ND	-1.717
CD69	-1.569	-2.339
CDKN2D	-1.46	ND
HGF	-1.789	-2.606
TP63	ND	6.367
UNG	ND	1.815
FGFR1	-2.044	-1.844
IKBKB	ND	-1.133
SLC6A4	-4.981	-4.858
KAT2B	-1.232	-1.632
RECK	-1.811	-1.976
KLF2	-2.732	-3.889
KDR	-1.32	-2.588
RAF1	ND	-1.03
SOX5	-1.011	ND
MAP7	1.177	1.622
KLF4	-2.946	-1.814
HMGA1	1.737	2.752
RGS5	ND	-1.158
HDGF	ND	1.097
TPPP3	-1.634	-2.3
ZYX	-1.635	-1.57
ITGA5	-2.163	-1.704
IKZF1	ND	-1.366
HDAC2	ND	1.099
MIF	1.046	1.787

## Sheet: adjp
Gene Symbol	LUAD	LUSC
AKT3	1.33e-108	1.31e-58
AXIN2	6.12e-74	1.83e-116
BMPR2	2.68e-89	2.36e-102
CADM1	ND	7.07e-50
CCND2	1.42e-73	ND
CCND3	ND	5.43e-107
CD69	1.14e-66	5.91e-103
CDKN2D	2.19e-77	ND
HGF	2.41e-83	1.71e-141
TP63	ND	3.36e-184
UNG	ND	5.97e-172
FGFR1	1.36e-80	1.47e-49
IKBKB	ND	1.59e-35
SLC6A4	1.84e-187	2.42e-174
KAT2B	9.07e-100	1.04e-144
RECK	1.27e-150	7.86e-161
KLF2	3.79e-127	2.9e-204
KDR	2.48e-40	1.71e-171
RAF1	ND	7.74e-72
SOX5	2.08e-104	ND
MAP7	1.7e-65	9.86e-108
KLF4	7.44e-132	2.68e-58
HMGA1	1.6e-93	4.77e-191
RGS5	ND	4.53e-51
HDGF	ND	1.55e-67
TPPP3	1.38e-35	1.51e-60
ZYX	5.16e-94	5.08e-86
ITGA5	2.36e-91	3.72e-63
IKZF1	ND	6.85e-76
HDAC2	ND	6.76e-87
MIF	8.07e-63	2.98e-99
