# Supplementary material for: Circulating miR-16-5p, miR-92a-3p, and miR-451a in Plasma from Lung Cancer Patients: Potential Application in Early Detection and a Regulatory Role in Tumorigenesis Pathways
Source: Cancers (Basel). 2020 Jul 27;12(8):2071. doi: 10.3390/cancers12082071 (PMC7465670; doi:10.3390/cancers12082071)
Supplement: Supplementary file 1 [file cancers-12-02071-s001.zip › Table S7.xlsx]

## Sheet: Gene Ontology
	Term	P-value	Adj. P-value	neg.log10.padj	log2(c. score)	C. Score	n Genes	Genes
GO	positive regulation of protein phosphorylation	2.34E-17	1.19E-13	1.29E+01	8.86	465	21	APP	BMPR2	CCNT2	CAB39	HGF	AXIN2	MIF	SIRT1	ACVR2A	MTOR	IGF1R	VEGFA	CCND3	CCND2	CCND1	KDR	MAPK1	KRAS	ITGA5	RAF1	FGFR1
GO	negative regulation of apoptotic process	4.23E-17	1.08E-13	1.30E+01	8.67	407	22	CDKN2D	HDAC2	BDNF	HGF	MIF	KLF4	SIRT1	HIPK3	IGF1R	VEGFA	IKBKB	MAPK8	CCND2	RPS6KB1	ARHGDIA	KDR	PIM1	BCL2	ITGA5	RAF1	TP63	FGFR1
GO	positive regulation of phosphorylation	8.53E-15	1.45E-11	1.08E+01	9.12	556	15	APP	HGF	AXIN2	MIF	SIRT1	ACVR2A	MTOR	IGF1R	VEGFA	CCND3	CCND2	CCND1	KDR	KRAS	FGFR1
GO	regulation of cell proliferation	2.51E-14	3.20E-11	1.05E+01	7.86	232	23	YAP1	CDKN2D	APP	HDAC2	BMPR2	HGF	PTEN	HMGA1	ADAM10	TSC1	AXIN2	PPM1D	KLF4	SIRT1	IGF1R	VEGFA	KAT2B	CCND2	CDK6	KDR	KRAS	RAF1	FGFR1
GO	negative regulation of cellular process	5.24E-14	5.35E-11	1.03E+01	8.09	273	20	CDKN2D	APP	BMPR2	CAB39	PTEN	HMGA1	ADAM10	TSC1	AXIN2	MIF	PPM1D	KLF4	SIRT1	ESR2	DCBLD2	KAT2B	CDK6	ARHGDIA	BCL2	RAF1
GO	negative regulation of programmed cell death	7.15E-14	6.08E-11	1.02E+01	8.31	318	18	HDAC2	HGF	MIF	SIRT1	HIPK3	IGF1R	VEGFA	IKBKB	MAPK8	CCND2	RPS6KB1	ARHGDIA	KDR	PIM1	BCL2	RAF1	TP63	FGFR1
GO	protein phosphorylation	7.88E-13	5.75E-10	9.24E+00	7.99	254	18	APP	CHUK	CAB39	ADAM10	HIPK3	MTOR	IGF1R	IKBKB	MAPK8	CDK6	RPS6KB1	AKT3	KDR	PIM1	MAPK1	RICTOR	RAF1	FGFR1
GO	positive regulation of protein modification process	3.88E-12	2.48E-09	8.61E+00	8.85	461	12	APP	CCND3	CCND2	CCND1	HGF	KDR	KRAS	AXIN2	SIRT1	ACVR2A	MTOR	VEGFA
GO	regulation of protein phosphorylation	6.48E-11	3.68E-08	7.43E+00	8.12	278	13	APP	HGF	PTEN	AXIN2	SIRT1	ACVR2A	MTOR	VEGFA	CCND3	CCND2	CCND1	KDR	KRAS
GO	regulation of apoptotic process	1.16E-10	5.90E-08	7.23E+00	7.06	134	20	MAP2K4	HDAC2	HGF	MIF	SIRT1	HIPK3	IGF1R	VEGFA	IKBKB	MAPK8	CCND2	BCL2L11	RPS6KB1	ARHGDIA	KDR	PIM1	BCL2	RAF1	TP63	FGFR1
GO	negative regulation of response to stimulus	1.38E-10	6.41E-08	7.19E+00	8.73	426	10	NCOR2	CDK6	AKT3	KDR	RAF1	KLF4	SIRT1	IGF1R	SOCS5	FGFR1
GO	phosphorylation	7.34E-10	3.12E-07	6.51E+00	7.50	182	14	APP	CHUK	ADAM10	HIPK3	MTOR	IKBKB	MAPK8	CDK6	RPS6KB1	AKT3	PIM1	MAPK1	RAF1	FGFR1
GO	positive regulation of transcription from RNA polymerase II promoter	1.67E-09	6.54E-07	6.18E+00	6.75	108	19	YAP1	APP	HDAC2	BMPR2	CCNT2	CHUK	PCGF5	HGF	HMGA1	IKZF1	KLF4	SIRT1	ACVR2A	KLF2	VEGFA	IKBKB	KAT2B	MYB	TP63
GO	positive regulation of cell proliferation	2.46E-09	8.97E-07	6.05E+00	7.28	156	14	HDAC2	HGF	PTEN	ADAM10	MIF	SIRT1	IGF1R	VEGFA	CCND2	CDK6	KDR	PIM1	KRAS	FGFR1
GO	positive regulation of gene expression	2.53E-09	8.61E-07	6.07E+00	6.78	110	18	YAP1	APP	HDAC2	CHUK	HMGA1	KLF4	ESR2	KLF2	MTOR	VEGFA	IKBKB	KAT2B	MAPK8	RPS6KB1	MYB	MAPK1	KRAS	TP63
GO	negative regulation of cell proliferation	3.67E-09	1.17E-06	5.93E+00	7.37	166	13	CDKN2D	APP	BMPR2	PTEN	HMGA1	TSC1	AXIN2	PPM1D	KLF4	KAT2B	DUSP10	CDK6	RAF1
GO	cellular protein modification process	4.09E-09	1.23E-06	5.91E+00	6.52	92	20	APP	CHUK	FBXW7	PTEN	ADAM10	PPM1D	HIPK3	MTOR	IKBKB	MAPK8	DUSP10	CDK6	RPS6KB1	AKT3	PIM1	MAPK1	RAF1	RAB5A	SOCS5	FGFR1
GO	positive regulation of transcription, DNA-templated	4.76E-09	1.35E-06	5.87E+00	6.42	86	21	YAP1	APP	HDAC2	BMPR2	CCNT2	CHUK	PCGF5	HGF	HMGA1	IKZF1	KLF4	SIRT1	ACVR2A	ESR2	KLF2	MTOR	VEGFA	IKBKB	KAT2B	MYB	TP63
GO	regulation of transcription from RNA polymerase II promoter	4.98E-09	1.34E-06	5.87E+00	6.21	74	24	YAP1	APP	HDAC2	BMPR2	CCNT2	CHUK	PCGF5	HGF	HMGA1	IKZF1	KLF4	SIRT1	ACVR2A	ESR2	KLF2	VEGFA	IKBKB	NCOR2	KAT2B	CCND1	RAD21	MYB	HDGF	TP63
GO	cellular response to growth factor stimulus	6.90E-09	1.76E-06	5.75E+00	8.18	290	9	BMPR2	RPS6KB1	HGF	KDR	SOX6	KLF4	ACVR2A	SOX5	VEGFA
GO	peptidyl-serine phosphorylation	1.00E-08	2.43E-06	5.61E+00	8.09	272	9	IKBKB	MAPK8	CHUK	CAB39	AKT3	MAPK1	RICTOR	HIPK3	MTOR
GO	positive regulation of cellular process	3.17E-08	7.35E-06	5.13E+00	6.79	111	14	HDAC2	HGF	PTEN	ADAM10	AXIN2	SIRT1	IGF1R	VEGFA	CCND2	CCND1	KDR	BCL2	KRAS	FGFR1
GO	positive regulation of protein serine/threonine kinase activity	3.47E-08	7.69E-06	5.11E+00	8.12	277	8	CCND3	CCNT2	CCND2	CCND1	CAB39	SIRT1	VEGFA	FGFR1
GO	negative regulation of gene expression	3.89E-08	8.28E-06	5.08E+00	6.62	99	15	APP	HDAC2	HMGA1	TSC1	IKZF1	MIF	PPM1D	KLF4	SIRT1	VEGFA	NCOR2	CAPRIN1	MYB	KDR	TP63
GO	peptidyl-serine modification	3.99E-08	8.15E-06	5.09E+00	7.75	215	9	IKBKB	MAPK8	CHUK	CAB39	AKT3	MAPK1	RICTOR	HIPK3	MTOR
GO	positive regulation of cell cycle	5.27E-08	1.03E-05	4.99E+00	8.41	341	7	APP	CCND3	CCNT2	CCND2	CCND1	RPS6KB1	MIF
GO	positive regulation of intracellular signal transduction	9.65E-08	1.82E-05	4.74E+00	6.71	104	13	APP	CHUK	HGF	MIF	SIRT1	IGF1R	VEGFA	IKBKB	BCL2L11	KDR	BCL2	RICTOR	FGFR1
GO	positive regulation of sprouting angiogenesis	1.06E-07	1.92E-05	4.72E+00	9.42	683	5	AKT3	KDR	ITGA5	KLF4	VEGFA
GO	positive regulation of cell differentiation	1.24E-07	2.18E-05	4.66E+00	7.46	176	9	BMPR2	HGF	KDR	AXIN2	SOX6	TP63	ACVR2A	MTOR	SOX5
GO	positive regulation of macromolecule biosynthetic process	1.47E-07	2.49E-05	4.60E+00	7.72	211	8	HDAC2	RPS6KB1	HGF	KDR	KLF4	SIRT1	MTOR	IGF1R
GO	negative regulation of signal transduction	3.01E-07	4.96E-05	4.30E+00	6.98	126	10	RPS6KB1	FBXW7	PTEN	KDR	BCL2	TSC1	RAF1	IGF1R	SOCS5	FGFR1
GO	regulation of cyclin-dependent protein serine/threonine kinase activity	3.72E-07	5.94E-05	4.23E+00	8.30	316	6	CDKN2D	CCND3	CCNT2	CCND2	CCND1	PTEN
GO	positive regulation of endothelial cell proliferation	3.72E-07	5.76E-05	4.24E+00	8.30	316	6	BMPR2	AKT3	KDR	SIRT1	VEGFA	FGFR1
GO	negative regulation of cell aging	3.81E-07	5.73E-05	4.24E+00	9.87	938	4	CDK6	AKT3	MIF	SIRT1
GO	negative regulation of cysteine-type endopeptidase activity involved in apoptotic process	4.07E-07	5.93E-05	4.23E+00	8.27	309	6	CDKN2D	HGF	RAF1	RFFL	KLF4	VEGFA
GO	regulation of osteoblast differentiation	4.44E-07	6.30E-05	4.20E+00	8.24	303	6	BMPR2	CDK6	HGF	AXIN2	TP63	ACVR2A
GO	positive regulation of endothelial cell migration	4.84E-07	6.68E-05	4.18E+00	8.21	297	6	BMPR2	AKT3	KDR	SIRT1	VEGFA	FGFR1
GO	positive regulation of nitrogen compound metabolic process	6.61E-07	8.87E-05	4.05E+00	9.64	797	4	APP	MAPK8	KLF4	KLF2
GO	regulation of cell migration	8.26E-07	1.08E-04	3.97E+00	6.72	106	10	DUSP10	HGF	PTEN	KDR	ADAM10	MAPRE1	RFFL	RECK	IGF1R	VEGFA
GO	regulation of ERK1 and ERK2 cascade	9.50E-07	1.21E-04	3.92E+00	6.91	120	9	APP	DUSP10	FBXW7	PTEN	KDR	MIF	RAF1	IGF1R	FGFR1
GO	regulation of sprouting angiogenesis	1.07E-06	1.33E-04	3.88E+00	9.43	689	4	ITGA5	KLF4	KLF2	VEGFA
GO	regulation of phosphatidylinositol 3-kinase signaling	1.07E-06	1.30E-04	3.88E+00	7.94	245	6	HGF	PTEN	KDR	MAPK1	SIRT1	FGFR1
GO	positive regulation of blood vessel endothelial cell migration	1.24E-06	1.47E-04	3.83E+00	8.49	360	5	AKT3	KDR	SIRT1	VEGFA	FGFR1
GO	regulation of cell growth	2.05E-06	2.38E-04	3.62E+00	6.96	124	8	CDKN2D	BMPR2	BCL2	ADAM10	SIRT1	ESR2	MTOR	DCBLD2
GO	regulation of blood vessel endothelial cell migration	2.12E-06	2.40E-04	3.62E+00	8.28	311	5	AKT3	KDR	SIRT1	VEGFA	FGFR1
GO	negative regulation of cyclin-dependent protein serine/threonine kinase activity involved in G1/S transition of mitotic cell cycle	2.47E-06	2.74E-04	3.56E+00	10.36	1317	3	CDKN2D	CDK6	PTEN
GO	MAPK cascade	2.52E-06	2.74E-04	3.56E+00	6.63	99	9	IKBKB	MAPK8	CHUK	HGF	KDR	MAPK1	KRAS	RAF1	FGFR1
GO	regulation of cysteine-type endopeptidase activity involved in apoptotic process	2.61E-06	2.77E-04	3.56E+00	7.63	197	6	CDKN2D	HGF	RAF1	KLF4	SIRT1	VEGFA
GO	regulation of cellular senescence	2.89E-06	3.00E-04	3.52E+00	8.98	506	4	CDK6	AKT3	HMGA1	SIRT1
GO	positive regulation of cyclin-dependent protein kinase activity	4.03E-06	4.12E-04	3.39E+00	8.83	455	4	CCND3	CCNT2	CCND2	CCND1
GO	positive regulation of cell migration	4.15E-06	4.15E-04	3.38E+00	6.74	107	8	BMPR2	HGF	KDR	ADAM10	MAPRE1	MTOR	IGF1R	VEGFA
GO	positive regulation of angiogenesis	4.73E-06	4.64E-04	3.33E+00	7.41	170	6	KDR	ITGA5	HIPK1	KLF4	SIRT1	VEGFA
GO	regulation of signal transduction	6.12E-06	5.90E-04	3.23E+00	6.62	98	8	APP	RGS5	KDR	RAF1	SIRT1	IGF1R	SOCS5	FGFR1
GO	stress-activated MAPK cascade	6.21E-06	5.87E-04	3.23E+00	7.85	230	5	IKBKB	MAP2K4	MAPK8	CHUK	MAPK1
GO	cellular response to decreased oxygen levels	7.27E-06	6.75E-04	3.17E+00	7.78	220	5	TSC1	SIRT1	CPEB2	MTOR	VEGFA
GO	regulation of protein insertion into mitochondrial membrane involved in apoptotic signaling pathway	7.30E-06	6.65E-04	3.18E+00	8.55	375	4	MAPK8	BCL2L11	BCL2	TP63
GO	regulation of cell migration involved in sprouting angiogenesis	7.30E-06	6.54E-04	3.18E+00	8.55	375	4	AKT3	KDR	KLF4	VEGFA
GO	positive regulation of cyclin-dependent protein serine/threonine kinase activity	7.30E-06	6.42E-04	3.19E+00	8.55	375	4	CCND3	CCNT2	CCND2	CCND1
GO	positive regulation of protein insertion into mitochondrial membrane involved in apoptotic signaling pathway	7.30E-06	6.31E-04	3.20E+00	8.55	375	4	MAPK8	BCL2L11	BCL2	TP63
GO	regulation of macroautophagy	9.40E-06	7.99E-04	3.10E+00	7.16	143	6	MAPK8	KDR	TSC1	SIRT1	RAB5A	MTOR
GO	positive regulation of cell-matrix adhesion	1.08E-05	9.03E-04	3.04E+00	8.37	330	4	CDK6	KDR	TSC1	VEGFA
GO	regulation of phosphorylation	1.09E-05	8.96E-04	3.05E+00	7.10	137	6	IKBKB	CDKN2D	APP	RICTOR	MIF	SIRT1
GO	stress-activated protein kinase signaling cascade	1.13E-05	9.17E-04	3.04E+00	7.60	194	5	IKBKB	MAP2K4	MAPK8	CHUK	MAPK1
GO	negative regulation of cellular senescence	1.15E-05	9.18E-04	3.04E+00	9.53	738	3	CDK6	AKT3	SIRT1
GO	response to insulin	1.21E-05	9.53E-04	3.02E+00	7.57	190	5	KAT2B	RPS6KB1	TSC1	SIRT1	CPEB2
GO	negative regulation of cysteine-type endopeptidase activity	1.30E-05	0.001004941	3.00E+00	7.54	186	5	CDKN2D	HGF	RAF1	KLF4	VEGFA
GO	positive regulation of osteoblast differentiation	1.37E-05	0.001045421	2.98E+00	8.25	305	4	BMPR2	HGF	TP63	ACVR2A
GO	negative regulation of macromolecule metabolic process	1.38E-05	0.001033505	2.99E+00	7.01	129	6	APP	KDR	MIF	KLF4	SIRT1	VEGFA
GO	positive regulation of mitochondrial outer membrane permeabilization involved in apoptotic signaling pathway	1.72E-05	0.001272278	2.90E+00	8.14	282	4	MAPK8	BCL2L11	BCL2	TP63
GO	negative regulation of cell communication	1.92E-05	0.001401755	2.85E+00	7.37	166	5	KDR	RAF1	IGF1R	SOCS5	FGFR1
GO	positive regulation of endothelial cell chemotaxis	1.98E-05	0.001425119	2.85E+00	9.22	595	3	KDR	VEGFA	FGFR1
GO	regulation of endothelial cell proliferation	2.05E-05	0.001450129	2.84E+00	7.35	163	5	BMPR2	AKT3	KDR	SIRT1	VEGFA
GO	positive regulation of macromolecule metabolic process	2.09E-05	0.001462625	2.83E+00	6.22	74	8	APP	MAPK8	MAPK1	KRAS	KLF4	KLF2	MTOR	VEGFA
GO	cellular response to cytokine stimulus	2.10E-05	0.001450999	2.84E+00	5.81	56	10	IKBKB	MAPK8	CCND1	CHUK	HGF	PIM1	BCL2	SIRT1	SOCS5	VEGFA
GO	regulation of protein serine/threonine kinase activity	2.18E-05	0.001480064	2.83E+00	7.32	160	5	CDKN2D	CCNT2	CAB39	PTEN	SIRT1
GO	positive regulation of ERK1 and ERK2 cascade	2.20E-05	0.00147466	2.83E+00	6.47	89	7	APP	FBXW7	KDR	MIF	RAF1	IGF1R	FGFR1
GO	negative regulation of transcription from RNA polymerase II promoter	2.38E-05	0.001580422	2.80E+00	5.62	49	11	NCOR2	HDAC2	CCND1	MYB	HDGF	KLF4	SIRT1	TP63	ESR2	KLF2	VEGFA
GO	positive regulation of transferase activity	2.43E-05	0.001587859	2.80E+00	6.79	111	6	FBXW7	KDR	MAPK1	KLF4	IGF1R	FGFR1
GO	regulation of gene expression	2.44E-05	0.001573846	2.80E+00	5.19	37	15	APP	HMGA1	MIF	KLF4	SIRT1	ESR2	MTOR	VEGFA	MAPK8	CDK6	MYB	KDR	MAPK1	KRAS	SOX6
GO	regulation of cyclin-dependent protein serine/threonine kinase activity involved in G1/S transition of mitotic cell cycle	2.52E-05	0.001604858	2.79E+00	9.08	540	3	CDKN2D	CDK6	PTEN
GO	positive regulation of signal transduction	2.57E-05	0.00162007	2.79E+00	6.42	86	7	KAT2B	BDNF	PTEN	ITGA5	SIRT1	TP63	VEGFA
GO	negative regulation of signaling	2.60E-05	0.001618929	2.79E+00	7.24	151	5	KDR	RAF1	IGF1R	SOCS5	FGFR1
GO	positive regulation of MAPK cascade	2.91E-05	0.001787334	2.75E+00	6.11	69	8	APP	FBXW7	KDR	MIF	RAF1	IGF1R	VEGFA	FGFR1
GO	regulation of peptidyl-tyrosine phosphorylation	2.92E-05	0.001773747	2.75E+00	7.19	146	5	APP	HGF	MIF	ITGA5	VEGFA
GO	negative regulation of signal transduction by p53 class mediator	3.14E-05	0.001882347	2.73E+00	8.95	494	3	MIF	RFFL	SIRT1
GO	regulation of cartilage development	3.14E-05	0.001860459	2.73E+00	8.95	494	3	BMPR2	SOX6	SOX5
GO	negative regulation of transcription, DNA-templated	3.26E-05	0.001913065	2.72E+00	5.30	39	13	HDAC2	HMGA1	IKZF1	KLF4	SIRT1	ESR2	KLF2	VEGFA	NCOR2	CCND1	MYB	HDGF	TP63
GO	regulation of cell cycle	3.38E-05	0.001960065	2.71E+00	6.32	80	7	MAP2K4	WEE1	CDK6	CCND1	PIM1	TSC1	SIRT1
GO	regulation of focal adhesion assembly	3.46E-05	0.001982597	2.70E+00	7.80	222	4	PTEN	KDR	TSC1	VEGFA
GO	positive regulation of cell migration involved in sprouting angiogenesis	3.85E-05	0.002181397	2.66E+00	8.83	454	3	AKT3	KDR	VEGFA
GO	negative regulation of autophagy	4.13E-05	0.002316046	2.64E+00	7.71	209	4	HGF	BCL2	TSC1	MTOR
GO	transmembrane receptor protein tyrosine kinase signaling pathway	4.24E-05	0.00235323	2.63E+00	5.77	54	9	BMPR2	RAB14	BDNF	HGF	KDR	MAPK1	IGF1R	VEGFA	FGFR1
GO	cell cycle G1/S phase transition	4.28E-05	0.002347355	2.63E+00	7.02	130	5	CDKN2D	WEE1	CDK6	CCND1	RPS6KB1
GO	positive regulation of focal adhesion assembly	4.66E-05	0.002528439	2.60E+00	8.71	419	3	KDR	TSC1	VEGFA
GO	positive regulation of cartilage development	4.66E-05	0.002501824	2.60E+00	8.71	419	3	BMPR2	SOX6	SOX5
GO	positive regulation of nucleic acid-templated transcription	4.75E-05	0.002524839	2.60E+00	5.56	47	10	IKBKB	YAP1	HDAC2	CHUK	MYB	HMGA1	KLF4	TP63	ESR2	KLF2
GO	intrinsic apoptotic signaling pathway in response to DNA damage	4.89E-05	0.002574318	2.59E+00	7.62	197	4	BCL2L11	BCL2	SIRT1	TP63
GO	positive regulation of cellular biosynthetic process	5.60E-05	0.002914916	2.54E+00	6.46	88	6	RPS6KB1	HGF	KLF4	KLF2	MTOR	IGF1R
GO	negative regulation of cellular macromolecule biosynthetic process	5.60E-05	0.002887805	2.54E+00	5.51	46	10	HDAC2	BMPR2	CAPRIN1	MYB	HMGA1	TSC1	IKZF1	KLF4	SIRT1	TP63
GO	negative regulation of neuron projection development	6.22E-05	0.003176465	2.50E+00	7.50	181	4	MYLIP	HDAC2	ARHGDIA	PTEN
GO	positive regulation of adherens junction organization	6.60E-05	0.003333027	2.48E+00	8.50	362	3	KDR	TSC1	VEGFA
GO	positive regulation of ossification	6.72E-05	0.003362949	2.47E+00	7.46	176	4	BMPR2	HGF	TP63	ACVR2A
GO	positive regulation of phosphatidylinositol 3-kinase signaling	7.25E-05	0.003590686	2.44E+00	7.42	171	4	HGF	KDR	SIRT1	FGFR1
GO	cellular response to nutrient levels	7.80E-05	0.00382842	2.42E+00	7.38	167	4	BMPR2	TSC1	SIRT1	MTOR
GO	G1/S transition of mitotic cell cycle	8.05E-05	0.003911905	2.41E+00	6.74	107	5	CDKN2D	WEE1	CDK6	CCND1	RPS6KB1
GO	positive regulation of epithelial cell proliferation	8.80E-05	0.0042383	2.37E+00	6.70	104	5	BMPR2	AKT3	KDR	SIRT1	VEGFA
GO	cellular response to starvation	8.80E-05	0.004198689	2.38E+00	6.70	104	5	MAPK8	BMPR2	MAPK1	SIRT1	MTOR
GO	regulation of tumor necrosis factor-mediated signaling pathway	9.00E-05	0.004254375	2.37E+00	7.31	158	4	IKBKB	CHUK	RFFL	HIPK1
GO	positive regulation of establishment of protein localization to mitochondrion	1.00E-04	0.004698751	2.33E+00	6.64	100	5	MAPK8	BCL2L11	FBXW7	BCL2	TP63
GO	positive regulation of cell motility	1.08E-04	0.004999546	2.30E+00	6.19	73	6	HGF	KDR	ADAM10	MAPRE1	IGF1R	VEGFA
GO	regulation of protein metabolic process	1.11E-04	0.005080474	2.29E+00	7.20	147	4	APP	MAPK8	KLF4	KLF2
GO	positive regulation of developmental process	1.14E-04	0.005193093	2.28E+00	6.58	96	5	BMPR2	KDR	SOX6	SIRT1	SOX5
GO	response to reactive oxygen species	1.18E-04	0.005330001	2.27E+00	7.17	144	4	MAPK8	CHUK	MAPK1	SIRT1
GO	Fc-epsilon receptor signaling pathway	1.18E-04	0.005284465	2.28E+00	6.15	71	6	IKBKB	MAP2K4	MAPK8	CHUK	MAPK1	KRAS
GO	positive regulation of cell junction assembly	1.19E-04	0.005285537	2.28E+00	8.13	281	3	KDR	TSC1	VEGFA
GO	Fc receptor signaling pathway	1.22E-04	0.005351545	2.27E+00	6.14	70	6	IKBKB	MAP2K4	MAPK8	CHUK	MAPK1	KRAS
GO	negative regulation of cell growth	1.24E-04	0.005400015	2.27E+00	6.54	93	5	CDKN2D	BMPR2	SIRT1	ESR2	DCBLD2
GO	negative regulation of developmental growth	1.36E-04	0.00586922	2.23E+00	8.05	265	3	DUSP10	PTEN	SLC6A4
GO	negative regulation of cyclin-dependent protein serine/threonine kinase activity	1.36E-04	0.005819898	2.24E+00	8.05	265	3	CDKN2D	CDK6	PTEN
GO	regulation of epidermal growth factor-activated receptor activity	1.36E-04	0.005771399	2.24E+00	8.05	265	3	APP	FBXW7	SOCS5
GO	negative regulation of intrinsic apoptotic signaling pathway in response to DNA damage	1.36E-04	0.005723702	2.24E+00	8.05	265	3	CDKN2D	MIF	SIRT1
GO	negative regulation of growth	1.51E-04	0.00632612	2.20E+00	6.45	87	5	CDKN2D	BMPR2	SIRT1	ESR2	DCBLD2
GO	positive regulation of peptidyl-threonine phosphorylation	1.54E-04	0.006379083	2.20E+00	7.97	251	3	APP	CAB39	MAPK1
GO	cellular response to reactive oxygen species	1.61E-04	0.006637155	2.18E+00	7.00	128	4	MAPK8	CHUK	MAPK1	SIRT1
GO	regulation of TOR signaling	1.81E-04	0.007406491	2.13E+00	6.94	122	4	TSC1	RICTOR	RFFL	SIRT1
GO	transcription from RNA polymerase II promoter	1.98E-04	0.008012762	2.10E+00	5.24	38	9	YAP1	KAT2B	BMPR2	CCNT2	CCND1	PPM1D	KLF4	ESR2	SOX5
GO	positive regulation of multicellular organismal process	2.08E-04	0.008365175	2.08E+00	5.91	60	6	BMPR2	AXIN2	SOX6	SIRT1	MTOR	SOX5
GO	negative regulation of response to DNA damage stimulus	2.17E-04	0.008652101	2.06E+00	7.75	215	3	CDKN2D	MIF	SIRT1
GO	cellular response to cadmium ion	2.41E-04	0.009546649	2.02E+00	7.68	205	3	MAPK8	CHUK	MAPK1
GO	positive regulation of deacetylase activity	2.59E-04	0.010151383	1.99E+00	9.36	656	2	MAPK8	VEGFA
GO	regulation of mesenchymal stem cell differentiation	2.59E-04	0.010073892	2.00E+00	9.36	656	2	SOX6	SOX5
GO	regulation of wound healing, spreading of epidermal cells	2.59E-04	0.009997574	2.00E+00	9.36	656	2	PTEN	MTOR
GO	positive regulation of fibroblast apoptotic process	2.59E-04	0.009922405	2.00E+00	9.36	656	2	BCL2L11	TP63
GO	positive regulation of epithelial cell migration	2.66E-04	0.010143048	1.99E+00	6.73	106	4	BMPR2	KDR	MTOR	VEGFA
GO	regulation of actin cytoskeleton organization	2.80E-04	0.010601315	1.97E+00	6.70	104	4	ARHGDIA	TSC1	RICTOR	MTOR
GO	positive regulation of sequence-specific DNA binding transcription factor activity	2.91E-04	0.010925991	1.96E+00	5.76	54	6	IKBKB	APP	CHUK	PTEN	ESR2	VEGFA
GO	response to cadmium ion	2.95E-04	0.010991343	1.96E+00	7.55	187	3	MAPK8	CHUK	MAPK1
GO	negative regulation of sequence-specific DNA binding transcription factor activity	3.10E-04	0.011460535	1.94E+00	6.10	69	5	HDAC2	CHUK	PIM1	KLF4	SIRT1
GO	cytokine-mediated signaling pathway	3.15E-04	0.011575525	1.94E+00	4.92	30	10	IKBKB	CCND1	CHUK	HGF	PIM1	BCL2	MIF	SIRT1	SOCS5	VEGFA
GO	mitotic cell cycle phase transition	3.37E-04	0.012295998	1.91E+00	5.69	52	6	CDKN2D	WEE1	CDK6	CCND1	RPS6KB1	MAPRE1
GO	positive regulation of histone H3-K9 methylation	3.61E-04	0.013067461	1.88E+00	9.07	539	2	MYB	SIRT1
GO	cellular response to laminar fluid shear stress	3.61E-04	0.012975437	1.89E+00	9.07	539	2	KLF4	KLF2
GO	positive regulation of cellular senescence	3.61E-04	0.0128847	1.89E+00	9.07	539	2	HMGA1	SIRT1
GO	positive regulation of cell migration by vascular endothelial growth factor signaling pathway	3.61E-04	0.012795223	1.89E+00	9.07	539	2	KDR	VEGFA
GO	regulation of insulin receptor signaling pathway	3.89E-04	0.013700015	1.86E+00	7.37	165	3	RPS6KB1	TSC1	SIRT1
GO	positive regulation of peptidyl-serine phosphorylation	4.13E-04	0.014447834	1.84E+00	6.48	89	4	APP	MIF	RAF1	VEGFA
GO	regulation of cyclin-dependent protein kinase activity	4.24E-04	0.01473586	1.83E+00	7.31	158	3	CDKN2D	CCNT2	PTEN
GO	protein kinase B signaling	4.24E-04	0.014636293	1.83E+00	7.31	158	3	CHUK	PTEN	KDR
GO	apoptotic process	4.27E-04	0.014617718	1.84E+00	5.58	48	6	APP	BCL2L11	BCL2	RAF1	TP63	MTOR
GO	activation of protein kinase activity	4.47E-04	0.015198356	1.82E+00	5.56	47	6	MAP2K4	MAPK1	RICTOR	RAF1	MTOR	VEGFA
GO	cellular response to DNA damage stimulus	4.69E-04	0.015833465	1.80E+00	5.28	39	7	YAP1	BCL2L11	CCND1	BCL2	SIRT1	MTOR	UNG
GO	regulation of peptidyl-serine phosphorylation	4.73E-04	0.015884586	1.80E+00	6.41	85	4	APP	MIF	RAF1	VEGFA
GO	positive regulation of cell aging	4.80E-04	0.016012957	1.80E+00	8.83	455	2	HMGA1	SIRT1
GO	regulation of fibroblast apoptotic process	4.80E-04	0.015908977	1.80E+00	8.83	455	2	BCL2L11	TP63
GO	regulation of MHC class II biosynthetic process	4.80E-04	0.015806339	1.80E+00	8.83	455	2	HDAC2	SIRT1
GO	peptidyl-lysine acetylation	4.80E-04	0.015705016	1.80E+00	8.83	455	2	KAT2B	SIRT1
GO	regulation of positive chemotaxis	4.80E-04	0.015604984	1.81E+00	8.83	455	2	KDR	VEGFA
GO	response to leptin	4.80E-04	0.015506218	1.81E+00	8.83	455	2	CCND1	SIRT1
GO	regulation of keratinocyte migration	4.80E-04	0.015408695	1.81E+00	8.83	455	2	PTEN	MTOR
GO	regulation of peptidyl-threonine phosphorylation	5.01E-04	0.015975565	1.80E+00	7.20	147	3	APP	CAB39	MAPK1
GO	transcription initiation from RNA polymerase II promoter	5.71E-04	0.018103814	1.74E+00	5.80	56	5	YAP1	KAT2B	CCND1	PPM1D	ESR2
GO	inositol lipid-mediated signaling	5.86E-04	0.018446405	1.73E+00	7.09	136	3	RPS6KB1	IGF1R	FGFR1
GO	cellular response to amino acid starvation	5.86E-04	0.018333237	1.74E+00	7.09	136	3	MAPK8	MAPK1	MTOR
GO	positive regulation of cellular protein metabolic process	5.86E-04	0.018237014	1.74E+00	6.28	78	4	HDAC2	RPS6KB1	KLF4	MTOR
GO	cellular response to acid chemical	5.86E-04	0.018126486	1.74E+00	6.28	78	4	KDR	KLF2	MTOR	VEGFA
GO	negative regulation of intracellular signal transduction	5.88E-04	0.018062166	1.74E+00	5.78	55	5	PTEN	BCL2	TSC1	RFFL	SIRT1
GO	regulation of organ growth	6.16E-04	0.018810706	1.73E+00	8.61	391	2	PTEN	SLC6A4
GO	epithelial cell apoptotic process	6.16E-04	0.018698738	1.73E+00	8.61	391	2	BMPR2	HIPK1
GO	positive regulation of vascular endothelial cell proliferation	6.16E-04	0.018588094	1.73E+00	8.61	391	2	AKT3	FGFR1
GO	regulation of protein kinase B signaling	6.21E-04	0.018652479	1.73E+00	5.75	54	5	HGF	PTEN	RICTOR	SIRT1	FGFR1
GO	regulation of mitotic cell cycle	6.57E-04	0.019595759	1.71E+00	5.72	53	5	APP	MAP2K4	RPS6KB1	PIM1	SIRT1
GO	regulation of protein localization	6.79E-04	0.020143299	1.70E+00	6.99	127	3	MAPK8	RAB14	FBXW7
GO	positive regulation of protein localization to membrane	6.89E-04	0.020332776	1.69E+00	6.19	73	4	MAPK8	BCL2L11	BCL2	TP63
GO	regulation of cytoskeleton organization	6.89E-04	0.020215921	1.69E+00	6.19	73	4	MAPK1	TSC1	RICTOR	MTOR
GO	positive regulation of protein metabolic process	7.17E-04	0.020907802	1.68E+00	6.17	72	4	APP	MAPK8	KLF4	KLF2
GO	response to tumor necrosis factor	7.45E-04	0.021614387	1.67E+00	6.14	71	4	IKBKB	CHUK	ADAM10	SIRT1
GO	response to laminar fluid shear stress	7.67E-04	0.022124461	1.66E+00	8.42	342	2	KLF4	KLF2
GO	regulation of mitochondrial depolarization	7.67E-04	0.022000166	1.66E+00	8.42	342	2	KDR	BCL2
GO	astrocyte development	7.67E-04	0.02187726	1.66E+00	8.42	342	2	APP	CDK6
GO	mitotic G1/S transition checkpoint	7.67E-04	0.02175572	1.66E+00	8.42	342	2	CCND1	TP63
GO	mitotic G1 DNA damage checkpoint	7.67E-04	0.021635523	1.66E+00	8.42	342	2	CCND1	TP63
GO	G1 DNA damage checkpoint	7.67E-04	0.021516646	1.67E+00	8.42	342	2	CCND1	TP63
GO	response to UV	7.75E-04	0.021603457	1.67E+00	6.12	70	4	CDKN2D	MAPK8	CCND1	TP63
GO	cellular response to transforming growth factor beta stimulus	8.36E-04	0.023175993	1.63E+00	6.08	67	4	ZYX	SOX6	SIRT1	SOX5
GO	protein autophosphorylation	8.56E-04	0.023610432	1.63E+00	5.59	48	5	KDR	PIM1	MTOR	IGF1R	FGFR1
GO	positive regulation of MAP kinase activity	9.01E-04	0.024710889	1.61E+00	5.56	47	5	MAP2K4	MAPK1	RAF1	VEGFA	FGFR1
GO	regulation of angiogenesis	9.01E-04	0.024578746	1.61E+00	5.56	47	5	KDR	HIPK1	KLF4	SIRT1	VEGFA
GO	regulation of histone H3-K9 methylation	9.35E-04	0.02538943	1.60E+00	8.24	302	2	MYB	SIRT1
GO	positive regulation of chondrocyte differentiation	9.35E-04	0.025255095	1.60E+00	8.24	302	2	SOX6	SOX5
GO	negative regulation of intrinsic apoptotic signaling pathway in response to DNA damage by p53 class mediator	9.35E-04	0.025122173	1.60E+00	8.24	302	2	MIF	SIRT1
GO	negative regulation of JUN kinase activity	9.35E-04	0.024990643	1.60E+00	8.24	302	2	DUSP10	HIPK3
GO	regulation of long-term neuronal synaptic plasticity	9.35E-04	0.024860484	1.60E+00	8.24	302	2	APP	RAB5A
GO	brain morphogenesis	9.35E-04	0.024731673	1.61E+00	8.24	302	2	PTEN	SLC6A4
GO	regulation of chromatin silencing	9.35E-04	0.02460419	1.61E+00	8.24	302	2	HMGA1	SIRT1
GO	positive regulation of T-helper cell differentiation	9.35E-04	0.024478015	1.61E+00	8.24	302	2	MYB	SOCS5
GO	macrophage differentiation	9.35E-04	0.024353127	1.61E+00	8.24	302	2	SIRT1	VEGFA
GO	regulation of G1/S transition of mitotic cell cycle	9.52E-04	0.02466866	1.61E+00	6.76	108	3	CCND2	PTEN	KLF4
GO	regulation of cellular component movement	9.52E-04	0.024544071	1.61E+00	6.76	108	3	CDK6	RAF1	VEGFA
GO	positive regulation of vasculature development	9.68E-04	0.024811148	1.61E+00	5.99	64	4	KDR	HIPK1	SIRT1	VEGFA
GO	cellular response to fluid shear stress	0.00111939	0.028561237	1.54E+00	8.07	270	2	KLF4	KLF2
GO	regulation of intrinsic apoptotic signaling pathway in response to DNA damage by p53 class mediator	0.00111939	0.028419141	1.55E+00	8.07	270	2	MIF	SIRT1
GO	negative regulation of DNA damage response, signal transduction by p53 class mediator	0.00111939	0.028278453	1.55E+00	8.07	270	2	MIF	SIRT1
GO	regulation of vascular endothelial cell proliferation	0.00111939	0.02813915	1.55E+00	8.07	270	2	AKT3	FGFR1
GO	positive regulation of stem cell differentiation	0.00111939	0.028001213	1.55E+00	8.07	270	2	SOX6	SOX5
GO	regulation of sister chromatid cohesion	0.00111939	0.027864622	1.55E+00	8.07	270	2	RAD21	AXIN2
GO	histone H3 deacetylation	0.00111939	0.027729356	1.56E+00	8.07	270	2	HDAC2	SIRT1
GO	positive regulation of vascular endothelial growth factor receptor signaling pathway	0.00111939	0.027595398	1.56E+00	8.07	270	2	ITGA5	VEGFA
GO	DNA-templated transcription, initiation	0.001123894	0.027573225	1.56E+00	5.44	43	5	YAP1	KAT2B	CCND1	PPM1D	ESR2
GO	cellular response to insulin stimulus	0.001191901	0.029101781	1.54E+00	5.87	58	4	KAT2B	RPS6KB1	CPEB2	IGF1R
GO	regulation of cellular protein metabolic process	0.001214857	0.029521016	1.53E+00	6.58	96	3	APP	TSC1	KLF4
GO	DNA repair	0.00134395	0.032503214	1.49E+00	5.04	33	6	CDKN2D	RAD21	HMGA1	SIRT1	MTOR	UNG
GO	cellular response to oxidative stress	0.001404838	0.033815502	1.47E+00	5.77	54	4	MAPK8	CHUK	MAPK1	CPEB2
GO	positive regulation of peptidyl-tyrosine phosphorylation	0.001450405	0.03474843	1.46E+00	5.75	54	4	HGF	MIF	ITGA5	VEGFA
GO	regulation of phosphate metabolic process	0.001535005	0.036603411	1.44E+00	7.78	220	2	IKBKB	RICTOR
GO	negative regulation of intrinsic apoptotic signaling pathway by p53 class mediator	0.001535005	0.036433163	1.44E+00	7.78	220	2	MIF	SIRT1
GO	cell migration involved in sprouting angiogenesis	0.001535005	0.036264491	1.44E+00	7.78	220	2	KDR	VEGFA
GO	positive regulation of DNA biosynthetic process	0.001601763	0.037667256	1.42E+00	6.39	84	3	HGF	MAPK1	KLF4
GO	enzyme linked receptor protein signaling pathway	0.00164301	0.038459991	1.41E+00	5.67	51	4	BMPR2	BDNF	KDR	ACVR2A
GO	regulation of autophagy	0.001654068	0.038542042	1.41E+00	5.23	38	5	MAPK8	FBXW7	HGF	BCL2	MTOR
GO	chromosome organization	0.001687332	0.039138438	1.41E+00	6.35	81	3	HDAC2	AXIN2	SIRT1
GO	chordate embryonic development	0.001687332	0.038961341	1.41E+00	6.35	81	3	ADAM10	VEGFA	FGFR1
GO	phosphatidylinositol-mediated signaling	0.001687332	0.038785839	1.41E+00	6.35	81	3	RPS6KB1	IGF1R	FGFR1
GO	negative regulation of cellular catabolic process	0.001687332	0.038611912	1.41E+00	6.35	81	3	HGF	BCL2	MTOR
GO	stimulatory C-type lectin receptor signaling pathway	0.001693805	0.038587	1.41E+00	5.65	50	4	IKBKB	CHUK	KRAS	RAF1
GO	regulation of cell differentiation	0.001693805	0.038415502	1.42E+00	5.65	50	4	CDK6	RAF1	KLF4	FGFR1
GO	vasculature development	0.001766337	0.039883267	1.40E+00	7.65	201	2	BMPR2	FBXW7
GO	negative regulation of anoikis	0.001766337	0.03970757	1.40E+00	7.65	201	2	BCL2	ITGA5
GO	innate immune response activating cell surface receptor signaling pathway	0.001852731	0.041467039	1.38E+00	5.59	48	4	IKBKB	CHUK	KRAS	RAF1
GO	negative regulation of multicellular organismal process	0.001907925	0.04251591	1.37E+00	5.58	48	4	DUSP10	FBXW7	PTEN	SLC6A4
GO	regulation of intracellular signal transduction	0.001987318	0.044092543	1.36E+00	4.62	25	7	HDAC2	ARHGDIA	MAPK1	RICTOR	RFFL	HIPK1	TP63
GO	peptidyl-threonine dephosphorylation	0.002013176	0.044472894	1.35E+00	7.53	185	2	DUSP10	PPM1D
GO	artery development	0.002013176	0.0442812	1.35E+00	7.53	185	2	BMPR2	VEGFA
GO	negative regulation of striated muscle cell differentiation	0.002013176	0.044091152	1.36E+00	7.53	185	2	BDNF	SOX6
GO	positive regulation of positive chemotaxis	0.002013176	0.043902728	1.36E+00	7.53	185	2	KDR	VEGFA
GO	neuron apoptotic process	0.002013176	0.043715908	1.36E+00	7.53	185	2	APP	BCL2
GO	regulation of translation	0.002040997	0.044132243	1.36E+00	5.11	35	5	APP	RPS6KB1	CAPRIN1	TSC1	MTOR
GO	DNA metabolic process	0.00208005	0.044786889	1.35E+00	4.81	28	6	PURA	RAD21	AXIN2	SIRT1	MTOR	UNG
GO	regulation of macromolecule metabolic process	0.002140119	0.04588667	1.34E+00	5.50	45	4	APP	MAPK8	CDK6	MAPK1
GO	positive regulation of cellular amide metabolic process	0.002157963	0.046075678	1.34E+00	6.17	72	3	APP	RPS6KB1	MTOR
GO	regulation of actin filament-based process	0.002260869	0.048071727	1.32E+00	6.13	70	3	TSC1	RICTOR	MTOR
GO	negative regulation of intrinsic apoptotic signaling pathway	0.002260869	0.047872259	1.32E+00	6.13	70	3	CDKN2D	BCL2	SIRT1
GO	embryo development ending in birth or egg hatching	0.002275391	0.047980665	1.32E+00	7.41	170	2	RICTOR	FGFR1
GO	cellular response to hypoxia	0.002326581	0.048858211	1.31E+00	5.45	44	4	SIRT1	CPEB2	MTOR	VEGFA
GO	cellular response to organic substance	0.002391145	0.05000824	1.30E+00	5.43	43	4	MAPK8	RPS6KB1	MAPK1	KLF4
GO	positive regulation of protein polymerization	0.002475705	0.051565388	1.29E+00	6.07	67	3	TPPP3	ARL2	MAPRE1
GO	axonogenesis	0.002490336	0.051659288	1.29E+00	5.00	32	5	APP	BDNF	PTEN	MAPK1	KRAS
GO	regulation of transcription, DNA-templated	0.002500373	0.051657511	1.29E+00	3.74	13	15	YAP1	HDAC2	CHUK	HMGA1	IKZF1	KLF4	SIRT1	ESR2	KLF2	VEGFA	IKBKB	RAD21	MYB	SOX6	TP63
GO	membrane protein ectodomain proteolysis	0.002552851	0.052529033	1.28E+00	7.30	158	2	BACE1	ADAM10
GO	blood vessel endothelial cell migration	0.002552851	0.052318073	1.28E+00	7.30	158	2	KDR	VEGFA
GO	positive regulation of morphogenesis of an epithelium	0.002552851	0.052108801	1.28E+00	7.30	158	2	MTOR	VEGFA
GO	negative regulation of nucleic acid-templated transcription	0.002641499	0.053703454	1.27E+00	4.48	22	7	HDAC2	MYB	HMGA1	IKZF1	KLF4	SIRT1	TP63
GO	negative regulation of epithelial cell proliferation	0.002702768	0.054731049	1.26E+00	6.00	64	3	DUSP10	CDK6	FBXW7
GO	regulation of signal transduction by p53 class mediator	0.002732551	0.055115451	1.26E+00	5.35	41	4	HDAC2	RFFL	HIPK1	TP63
GO	extracellular matrix organization	0.002792224	0.056097323	1.25E+00	4.93	31	5	APP	KDR	ADAM10	ITGA5	RECK
GO	negative regulation of phosphate metabolic process	0.002845427	0.056942021	1.24E+00	7.20	147	2	CDKN2D	SIRT1
GO	negative regulation of cell junction assembly	0.002845427	0.056719591	1.25E+00	7.20	147	2	IKBKB	PTEN
GO	peptidyl-threonine phosphorylation	0.002942286	0.058422128	1.23E+00	5.94	61	3	MAPK8	MAPK1	HIPK3
GO	regulation of epithelial to mesenchymal transition	0.002942286	0.058195686	1.24E+00	5.94	61	3	PTEN	AXIN2	MTOR
GO	response to organic cyclic compound	0.003066785	0.060423952	1.22E+00	5.90	60	3	CDKN2D	BCL2	MAPK1
GO	regulation of endothelial cell migration	0.003066785	0.060191552	1.22E+00	5.90	60	3	BMPR2	KDR	VEGFA
GO	positive regulation of T cell migration	0.00315299	0.061646394	1.21E+00	7.10	137	2	APP	ADAM10
GO	intrinsic apoptotic signaling pathway in response to DNA damage by p53 class mediator	0.00315299	0.061411102	1.21E+00	7.10	137	2	SIRT1	TP63
GO	regulation of anoikis	0.00315299	0.0611776	1.21E+00	7.10	137	2	BCL2	ITGA5
GO	glial cell development	0.00315299	0.060945867	1.22E+00	7.10	137	2	APP	CDK6
GO	transmembrane receptor protein serine/threonine kinase signaling pathway	0.003184662	0.061325782	1.21E+00	5.25	38	4	BMPR2	ZYX	SIRT1	ACVR2A
GO	regulation of Notch signaling pathway	0.003194479	0.061283557	1.21E+00	5.87	59	3	KAT2B	FBXW7	TP63
GO	negative regulation of developmental process	0.003194479	0.06105403	1.21E+00	5.87	59	3	CDK6	FBXW7	MIF
GO	vascular endothelial growth factor receptor signaling pathway	0.003194479	0.060826217	1.22E+00	5.87	59	3	BMPR2	KDR	VEGFA
GO	regulation of epithelial cell proliferation	0.003459557	0.065628698	1.18E+00	5.81	56	3	DUSP10	CDK6	VEGFA
GO	response to nicotine	0.003475412	0.065685287	1.18E+00	7.00	128	2	BCL2	MAPK1
GO	mesoderm development	0.003475412	0.065442906	1.18E+00	7.00	128	2	IKZF1	VEGFA
GO	negative regulation of macroautophagy	0.003475412	0.065202307	1.19E+00	7.00	128	2	TSC1	MTOR
GO	positive regulation of translational initiation	0.003475412	0.064963471	1.19E+00	7.00	128	2	RPS6KB1	MTOR
GO	ERK1 and ERK2 cascade	0.003475412	0.064726378	1.19E+00	7.00	128	2	KDR	MAPK1
GO	negative regulation of cell cycle arrest	0.003475412	0.064491009	1.19E+00	7.00	128	2	CCND1	MIF
GO	positive regulation of cytokine secretion	0.003596992	0.066505255	1.18E+00	5.78	55	3	CHUK	CADM1	MIF
GO	heart development	0.00359844	0.066291839	1.18E+00	5.17	36	4	KAT2B	BMPR2	PTEN	VEGFA
GO	negative regulation of cell differentiation	0.003685368	0.06764904	1.17E+00	5.15	36	4	CDK6	PTEN	AXIN2	SIRT1
GO	regulation of vascular endothelial growth factor receptor signaling pathway	0.003812566	0.069733055	1.16E+00	6.91	121	2	ITGA5	VEGFA
GO	positive regulation of proteolysis involved in cellular protein catabolic process	0.003812566	0.069484008	1.16E+00	6.91	121	2	FBXW7	PTEN
GO	negative regulation of GTPase activity	0.003812566	0.069236734	1.16E+00	6.91	121	2	ARL2	CPEB2
GO	regulation of DNA biosynthetic process	0.003812566	0.068991214	1.16E+00	6.91	121	2	BMPR2	HGF
GO	negative regulation of cell cycle G1/S phase transition	0.003812566	0.068747429	1.16E+00	6.91	121	2	PTEN	KLF4
GO	negative regulation of sprouting angiogenesis	0.003812566	0.06850536	1.16E+00	6.91	121	2	KLF4	KLF2
GO	negative regulation of phosphorylation	0.003881777	0.069504246	1.16E+00	5.72	53	3	CDKN2D	PTEN	SIRT1
GO	regulation of dendritic spine morphogenesis	0.004164325	0.074302616	1.13E+00	6.83	113	2	CAPRIN1	PTEN
GO	TOR signaling	0.004164325	0.074043721	1.13E+00	6.83	113	2	RPS6KB1	MTOR
GO	response to alkaloid	0.004164325	0.073786625	1.13E+00	6.83	113	2	BCL2	MAPK1
GO	negative regulation of axonogenesis	0.004164325	0.073531308	1.13E+00	6.83	113	2	ARHGDIA	PTEN
GO	cellular response to amyloid-beta	0.004164325	0.073277752	1.14E+00	6.83	113	2	APP	IGF1R
GO	regulation of cell size	0.004164325	0.073025938	1.14E+00	6.83	113	2	PTEN	MTOR
GO	regulation of chondrocyte differentiation	0.004164325	0.07277585	1.14E+00	6.83	113	2	SOX6	SOX5
GO	fibroblast growth factor receptor signaling pathway	0.0043341	0.075484346	1.12E+00	5.64	50	3	RAB14	MAPK1	FGFR1
GO	regulation of cellular response to heat	0.0043341	0.075227596	1.12E+00	5.64	50	3	MAPK1	SIRT1	MTOR
GO	axon guidance	0.0044327	0.076678205	1.12E+00	5.03	33	4	BDNF	MAPK1	KRAS	VEGFA
GO	peptidyl-tyrosine phosphorylation	0.004491672	0.07743581	1.11E+00	5.61	49	3	KDR	IGF1R	FGFR1
GO	positive regulation of histone methylation	0.004530563	0.077843311	1.11E+00	6.74	107	2	MYB	SIRT1
GO	positive regulation of microtubule polymerization	0.004530563	0.077582092	1.11E+00	6.74	107	2	ARL2	MAPRE1
GO	dendritic spine organization	0.004530563	0.07732262	1.11E+00	6.74	107	2	PTEN	IGF1R
GO	negative regulation of G1/S transition of mitotic cell cycle	0.004530563	0.077064878	1.11E+00	6.74	107	2	PTEN	KLF4
GO	regulation of neuronal synaptic plasticity	0.004530563	0.076808849	1.11E+00	6.74	107	2	APP	RAB5A
GO	positive regulation of microtubule polymerization or depolymerization	0.004530563	0.076554515	1.12E+00	6.74	107	2	ARL2	MAPRE1
GO	cellular senescence	0.004530563	0.07630186	1.12E+00	6.74	107	2	HMGA1	SIRT1
GO	cytoplasmic pattern recognition receptor signaling pathway	0.004530563	0.076050867	1.12E+00	6.74	107	2	IKBKB	CHUK
GO	negative regulation of MAPK cascade	0.004652678	0.077844647	1.11E+00	5.58	48	3	DUSP10	PTEN	IGF1R
GO	negative regulation of cell cycle process	0.004817142	0.080332927	1.10E+00	5.56	47	3	CCND1	FBXW7	MIF
GO	cellular response to vascular endothelial growth factor stimulus	0.004911156	0.081633979	1.09E+00	6.66	101	2	KDR	VEGFA
GO	negative regulation of wound healing	0.004911156	0.081368933	1.09E+00	6.66	101	2	DUSP10	PTEN
GO	negative regulation of insulin receptor signaling pathway	0.004911156	0.081105603	1.09E+00	6.66	101	2	RPS6KB1	TSC1
GO	nucleotide-binding domain, leucine rich repeat containing receptor signaling pathway	0.004911156	0.080843972	1.09E+00	6.66	101	2	IKBKB	CHUK
GO	regulation of protein ubiquitination involved in ubiquitin-dependent protein catabolic process	0.004911156	0.080584024	1.09E+00	6.66	101	2	FBXW7	PTEN
GO	in utero embryonic development	0.004911156	0.080325742	1.10E+00	6.66	101	2	ADAM10	VEGFA
GO	response to amyloid-beta	0.004911156	0.08006911	1.10E+00	6.66	101	2	APP	IGF1R
GO	regulation of DNA damage response, signal transduction by p53 class mediator	0.004911156	0.079814113	1.10E+00	6.66	101	2	MIF	SIRT1
GO	positive regulation of nitric oxide biosynthetic process	0.004911156	0.079560735	1.10E+00	6.66	101	2	KLF4	KLF2
GO	positive regulation of nitric oxide metabolic process	0.004911156	0.07930896	1.10E+00	6.66	101	2	KLF4	KLF2
GO	modulation of excitatory postsynaptic potential	0.004911156	0.079058774	1.10E+00	6.66	101	2	APP	PTEN
GO	modulation of chemical synaptic transmission	0.004985084	0.079996484	1.10E+00	5.53	46	3	APP	BDNF	PTEN
GO	negative regulation of NF-kappaB transcription factor activity	0.004985084	0.079745712	1.10E+00	5.53	46	3	CHUK	KLF4	SIRT1
GO	positive regulation of DNA metabolic process	0.004985084	0.079496506	1.10E+00	5.53	46	3	HGF	SIRT1	IGF1R
GO	glycerophospholipid biosynthetic process	0.005056005	0.080376296	1.09E+00	4.94	31	4	RAB14	PTEN	RAB5A	CDS2
GO	negative regulation of cellular response to insulin stimulus	0.005305981	0.084088257	1.08E+00	6.58	96	2	RPS6KB1	TSC1
GO	response to growth factor	0.005305981	0.083827922	1.08E+00	6.58	96	2	RPS6KB1	KLF4
GO	response to gamma radiation	0.005305981	0.083569193	1.08E+00	6.58	96	2	YAP1	TP63
GO	regulation of p38MAPK cascade	0.005305981	0.083312057	1.08E+00	6.58	96	2	DUSP10	VEGFA
GO	regulation of neuron differentiation	0.005331483	0.083455694	1.08E+00	5.48	45	3	BDNF	PTEN	FGFR1
GO	positive regulation of supramolecular fiber organization	0.005331483	0.083200478	1.08E+00	5.48	45	3	APP	ARL2	MAPRE1
GO	regulation of programmed cell death	0.005435313	0.084562195	1.07E+00	4.53	23	5	MAP2K4	BCL2L11	RAF1	SIRT1	TP63
GO	negative regulation of osteoblast differentiation	0.005714912	0.088641932	1.05E+00	6.51	91	2	CDK6	AXIN2
GO	regulation of MAP kinase activity	0.005877666	0.090890094	1.04E+00	5.40	42	3	IGF1R	VEGFA	FGFR1
GO	negative regulation of translation	0.006066893	0.09353279	1.03E+00	5.37	41	3	CAPRIN1	TSC1	CPEB2
GO	negative regulation of JNK cascade	0.006137828	0.094341377	1.03E+00	6.44	87	2	DUSP10	HIPK3
GO	positive regulation of phosphate metabolic process	0.006137828	0.094058069	1.03E+00	6.44	87	2	APP	MIF
GO	nucleotide-binding oligomerization domain containing signaling pathway	0.006137828	0.093776458	1.03E+00	6.44	87	2	IKBKB	CHUK
GO	positive regulation of fibroblast proliferation	0.006137828	0.093496529	1.03E+00	6.44	87	2	CDK6	MIF
GO	regulation of neuron apoptotic process	0.006259732	0.095069681	1.02E+00	5.35	41	3	BDNF	BCL2	TP63
GO	peptidyl-threonine modification	0.006259732	0.094787575	1.02E+00	5.35	41	3	MAPK8	MAPK1	HIPK3
GO	regulation of cytokine-mediated signaling pathway	0.006456202	0.09747337	1.01E+00	5.32	40	3	IKBKB	CHUK	HIPK1
GO	regulation of JNK cascade	0.006456202	0.097185837	1.01E+00	5.32	40	3	APP	DUSP10	IGF1R
GO	TRIF-dependent toll-like receptor signaling pathway	0.006574607	0.098677121	1.01E+00	6.37	83	2	IKBKB	CHUK
GO	positive regulation of transcription from RNA polymerase II promoter in response to stress	0.006574607	0.098387746	1.01E+00	6.37	83	2	KLF2	VEGFA
GO	positive regulation of cellular metabolic process	0.006860102	0.102359944	9.90E-01	5.27	39	3	HDAC2	KLF4	VEGFA
GO	artery morphogenesis	0.007025128	0.104516707	9.81E-01	6.30	79	2	BMPR2	VEGFA
GO	positive regulation of B cell proliferation	0.007025128	0.104212879	9.82E-01	6.30	79	2	BCL2	MIF
GO	regulation of protein polymerization	0.007025128	0.103910813	9.83E-01	6.30	79	2	TPPP3	ARL2
GO	activation of protein kinase B activity	0.007025128	0.103610493	9.85E-01	6.30	79	2	RICTOR	MTOR
GO	negative regulation of cell morphogenesis involved in differentiation	0.007025128	0.103311903	9.86E-01	6.30	79	2	ARHGDIA	PTEN
GO	positive regulation of reactive oxygen species biosynthetic process	0.007025128	0.10301503	9.87E-01	6.30	79	2	KLF4	KLF2
GO	MyD88-independent toll-like receptor signaling pathway	0.007025128	0.102719858	9.88E-01	6.30	79	2	IKBKB	CHUK
GO	cellular response to fibroblast growth factor stimulus	0.007278726	0.106123819	9.74E-01	5.23	37	3	RAB14	MAPK1	FGFR1
GO	positive regulation of ubiquitin-protein transferase activity	0.007489271	0.108882481	9.63E-01	6.23	75	2	FBXW7	PTEN
GO	regulation of cytokine secretion	0.007489271	0.108573156	9.64E-01	6.23	75	2	CADM1	MIF
GO	positive regulation of bone mineralization	0.007489271	0.108265583	9.66E-01	6.23	75	2	BMPR2	ACVR2A
GO	negative regulation of cell motility	0.007934542	0.11437844	9.42E-01	5.15	36	3	DUSP10	PTEN	RECK
GO	protein deacetylation	0.007966916	0.114521612	9.41E-01	6.17	72	2	HDAC2	SIRT1
GO	regulation of erythrocyte differentiation	0.007966916	0.114199922	9.42E-01	6.17	72	2	CDK6	ACVR2A
GO	regulation of nitric oxide biosynthetic process	0.007966916	0.113880034	9.44E-01	6.17	72	2	KLF4	KLF2
GO	vasculogenesis	0.007966916	0.113561933	9.45E-01	6.17	72	2	KDR	VEGFA
GO	phosphatidylinositol biosynthetic process	0.008160642	0.115999322	9.36E-01	5.13	35	3	RAB14	PTEN	RAB5A
GO	positive regulation of cell growth	0.008160642	0.115677101	9.37E-01	5.13	35	3	BDNF	BCL2	ADAM10
GO	positive regulation of biomineral tissue development	0.008457944	0.119559247	9.22E-01	6.11	69	2	BMPR2	ACVR2A
GO	protein acetylation	0.008457944	0.119228973	9.24E-01	6.11	69	2	KAT2B	SIRT1
GO	regulation of cell-substrate adhesion	0.008457944	0.118900518	9.25E-01	6.11	69	2	ARL2	TSC1
GO	positive regulation of Notch signaling pathway	0.008457944	0.118573868	9.26E-01	6.11	69	2	KAT2B	TP63
GO	cellular glucose homeostasis	0.008457944	0.118249008	9.27E-01	6.11	69	2	SIRT1	IGF1R
GO	positive regulation of intrinsic apoptotic signaling pathway	0.008457944	0.117925924	9.28E-01	6.11	69	2	BCL2L11	BCL2
GO	cellular response to metal ion	0.008624169	0.119915899	9.21E-01	5.09	34	3	MAPK8	CHUK	MAPK1
GO	regulation of kinase activity	0.008861623	0.122882778	9.11E-01	5.06	33	3	KDR	IGF1R	FGFR1
GO	regulation of JUN kinase activity	0.008962237	0.123941182	9.07E-01	6.05	66	2	DUSP10	HIPK3
GO	macromolecule catabolic process	0.008962237	0.123606206	9.08E-01	6.05	66	2	BACE1	MTOR
GO	negative regulation of protein kinase B signaling	0.009479678	0.13039029	8.85E-01	5.99	63	2	PTEN	SIRT1
GO	regulation of microtubule polymerization	0.009479678	0.130039779	8.86E-01	5.99	63	2	ARL2	MAPRE1
GO	erythrocyte differentiation	0.009479678	0.129691147	8.87E-01	5.99	63	2	IKZF1	VEGFA
GO	negative regulation of epithelial cell migration	0.009479678	0.129344379	8.88E-01	5.99	63	2	DUSP10	PTEN
GO	membrane protein proteolysis	0.009479678	0.128999461	8.89E-01	5.99	63	2	BACE1	ADAM10
GO	regulation of phosphoprotein phosphatase activity	0.009479678	0.128656377	8.91E-01	5.99	63	2	TSC1	MTOR
GO	positive regulation of telomerase activity	0.009479678	0.128315113	8.92E-01	5.99	63	2	MAPK1	KLF4
GO	regulation of cellular response to stress	0.009596901	0.129558158	8.88E-01	5.00	32	3	MAPK1	SIRT1	MTOR
GO	histone deacetylation	0.01001015	0.134780468	8.70E-01	5.93	61	2	HDAC2	SIRT1
GO	positive regulation of cellular component organization	0.010106303	0.135717015	8.67E-01	4.95	31	3	BDNF	IGF1R	VEGFA
GO	base-excision repair	0.010553538	0.14135093	8.50E-01	5.87	59	2	HMGA1	UNG
GO	regulation of DNA repair	0.010553538	0.140980901	8.51E-01	5.87	59	2	AXIN2	SIRT1
GO	positive regulation of axonogenesis	0.010553538	0.140612805	8.52E-01	5.87	59	2	BDNF	ARHGDIA
GO	regulation of MAPK cascade	0.01057341	0.140510706	8.52E-01	4.42	21	4	KDR	MAPK1	IGF1R	FGFR1
GO	negative regulation of hydrolase activity	0.010631187	0.140911546	8.51E-01	4.91	30	3	ARL2	SIRT1	CPEB2
GO	regulation of cellular amide metabolic process	0.011109726	0.146872876	8.33E-01	5.82	56	2	APP	TSC1
GO	cellular response to peptide hormone stimulus	0.011171636	0.147309706	8.32E-01	4.87	29	3	KAT2B	RPS6KB1	CPEB2
GO	regulation of protein binding	0.011447722	0.150561151	8.22E-01	4.85	29	3	APP	MAPK8	BCL2
GO	mitotic DNA damage checkpoint	0.011678599	0.153202806	8.15E-01	5.76	54	2	CCND1	TP63
GO	DNA biosynthetic process	0.011678599	0.152809978	8.16E-01	5.76	54	2	CDKN2D	SIRT1
GO	phosphatidylinositol metabolic process	0.01172773	0.15306037	8.15E-01	4.83	28	3	RAB14	PTEN	RAB5A
GO	positive regulation of kinase activity	0.012011667	0.156366166	8.06E-01	4.80	28	3	KDR	IGF1R	FGFR1
GO	response to peptide hormone	0.012260045	0.159193404	7.98E-01	5.71	52	2	TSC1	SIRT1
GO	negative regulation of ERK1 and ERK2 cascade	0.012260045	0.158789359	7.99E-01	5.71	52	2	DUSP10	PTEN
GO	negative regulation of TOR signaling	0.012260045	0.158387361	8.00E-01	5.71	52	2	TSC1	SIRT1
GO	regulation of release of cytochrome c from mitochondria	0.012260045	0.157987393	8.01E-01	5.71	52	2	BCL2L11	HGF
GO	neuron migration	0.012260045	0.15758944	8.02E-01	5.71	52	2	VEGFA	FGFR1
GO	positive regulation of epithelial to mesenchymal transition	0.012260045	0.157193486	8.04E-01	5.71	52	2	AXIN2	MTOR
GO	positive regulation of mitotic cell cycle phase transition	0.012260045	0.156799518	8.05E-01	5.71	52	2	CCND2	CCND1
GO	odontogenesis	0.012853949	0.163984255	7.85E-01	5.66	51	2	HDAC2	AXIN2
GO	cellular response to peptide	0.012853949	0.163575317	7.86E-01	5.66	51	2	APP	IGF1R
GO	DNA duplex unwinding	0.012853949	0.163168413	7.87E-01	5.66	51	2	PURA	HMGA1
GO	regulation of stress-activated MAPK cascade	0.012853949	0.162763529	7.88E-01	5.66	51	2	MAPK1	IGF1R
GO	negative regulation of cell projection organization	0.012853949	0.162360649	7.90E-01	5.66	51	2	MYLIP	HDAC2
GO	chromatin remodeling	0.012887145	0.162378025	7.89E-01	4.74	27	3	KAT2B	HDAC2	MYB
GO	regulation of telomerase activity	0.0134602	0.169180792	7.72E-01	5.61	49	2	MAPK1	KLF4
GO	regulation of neuron projection development	0.013798288	0.173004094	7.62E-01	4.68	26	3	MYLIP	HDAC2	PTEN
GO	regulation of B cell proliferation	0.014078686	0.1760871	7.54E-01	5.56	47	2	BCL2	MIF
GO	intrinsic apoptotic signaling pathway by p53 class mediator	0.014078686	0.175656569	7.55E-01	5.56	47	2	SIRT1	TP63
GO	negative regulation of cell migration	0.014425629	0.179546303	7.46E-01	4.65	25	3	DUSP10	PTEN	RECK
GO	sprouting angiogenesis	0.014709297	0.182631488	7.38E-01	5.51	46	2	KDR	VEGFA
GO	positive regulation of macroautophagy	0.014709297	0.182188208	7.39E-01	5.51	46	2	KDR	SIRT1
GO	posttranscriptional regulation of gene expression	0.014709297	0.181747074	7.41E-01	5.51	46	2	APP	TSC1
GO	peptidyl-tyrosine autophosphorylation	0.015351921	0.189229116	7.23E-01	5.47	44	2	KDR	IGF1R
GO	negative regulation of ossification	0.015351921	0.188773142	7.24E-01	5.47	44	2	CDK6	AXIN2
GO	platelet degranulation	0.015396635	0.188867853	7.24E-01	4.59	24	3	APP	HGF	VEGFA
GO	dephosphorylation	0.015396635	0.188414933	7.25E-01	4.59	24	3	DUSP10	PTEN	PPM1D
GO	protein dephosphorylation	0.015728325	0.192013499	7.17E-01	4.57	24	3	DUSP10	PTEN	PPM1D
GO	cellular response to ionizing radiation	0.01600645	0.194942517	7.10E-01	5.42	43	2	YAP1	SIRT1
GO	regulation of fibroblast proliferation	0.01600645	0.194478368	7.11E-01	5.42	43	2	CDK6	MIF
GO	positive regulation of protein kinase B signaling	0.016403769	0.198832387	7.02E-01	4.53	23	3	HGF	RICTOR	FGFR1
GO	positive regulation of gene expression, epigenetic	0.016672774	0.201614143	6.95E-01	5.37	41	2	KAT2B	HMGA1
GO	regulation of intrinsic apoptotic signaling pathway	0.016672774	0.201137514	6.97E-01	5.37	41	2	BCL2L11	BCL2
GO	positive regulation of pathway-restricted SMAD protein phosphorylation	0.016672774	0.200663133	6.98E-01	5.37	41	2	BMPR2	ACVR2A
GO	positive regulation of NF-kappaB transcription factor activity	0.016747533	0.201088608	6.97E-01	4.51	23	3	IKBKB	APP	CHUK
GO	positive regulation of mitochondrion organization	0.016747533	0.200616569	6.98E-01	4.51	23	3	BCL2L11	FBXW7	KDR
GO	transcription, DNA-templated	0.01707329	0.20403981	6.90E-01	3.77	14	5	BMPR2	CCNT2	KLF4	HIPK3	SOX5
GO	post-translational protein modification	0.017260134	0.205790804	6.87E-01	3.76	14	5	APP	FBXW7	ADAM10	RAB5A	SOCS5
GO	regulation of cell cycle arrest	0.017350786	0.206389425	6.85E-01	5.33	40	2	CCND1	MIF
GO	positive regulation of chemotaxis	0.017350786	0.205909449	6.86E-01	5.33	40	2	KDR	VEGFA
GO	regulation of epithelial cell migration	0.017350786	0.205431701	6.87E-01	5.33	40	2	BMPR2	DUSP10
GO	cellular response to mechanical stimulus	0.017350786	0.204956165	6.88E-01	5.33	40	2	MAP2K4	MAPK8
GO	generation of neurons	0.017447162	0.205618635	6.87E-01	4.48	22	3	YAP1	CDK6	FGFR1
GO	lipid homeostasis	0.018040378	0.212119934	6.73E-01	5.29	39	2	FBXW7	SIRT1
GO	regulation of bone mineralization	0.018741444	0.219856522	6.58E-01	5.24	38	2	BMPR2	ACVR2A
GO	myeloid leukocyte differentiation	0.018741444	0.219352264	6.59E-01	5.24	38	2	SIRT1	VEGFA
GO	wound healing	0.018741444	0.218850314	6.60E-01	5.24	38	2	RAF1	DCBLD2
GO	peptidyl-tyrosine modification	0.019453876	0.226650981	6.45E-01	5.20	37	2	KDR	FGFR1
GO	positive regulation of cell-substrate adhesion	0.02017757	0.234547018	6.30E-01	5.16	36	2	CDK6	ARL2
GO	positive regulation of mitotic cell cycle	0.02017757	0.234013956	6.31E-01	5.16	36	2	APP	RPS6KB1
GO	regulation of cell-matrix adhesion	0.02017757	0.233483312	6.32E-01	5.16	36	2	CDK6	TSC1
GO	regulation of vesicle-mediated transport	0.020407549	0.235610235	6.28E-01	4.33	20	3	RAB14	MAPK1	RAB5A
GO	response to cytokine	0.020407549	0.235078383	6.29E-01	4.33	20	3	MAPK8	BCL2	ADAM10
GO	regulation of cellular component organization	0.021188212	0.243521275	6.13E-01	4.30	20	3	RAB14	RAB5A	MTOR
GO	positive regulation of immune response	0.021658325	0.248365018	6.05E-01	5.08	34	2	MYB	SIRT1
GO	positive regulation of response to stimulus	0.021658325	0.247808146	6.06E-01	5.08	34	2	HMGA1	SIRT1
GO	regulation of axonogenesis	0.022415178	0.255894083	5.92E-01	5.04	33	2	ARHGDIA	PTEN
GO	fat cell differentiation	0.022415178	0.255322891	5.93E-01	5.04	33	2	KLF4	SIRT1
GO	Notch signaling pathway	0.022415178	0.254754243	5.94E-01	5.04	33	2	KAT2B	ADAM10
GO	DNA-dependent DNA replication	0.023182878	0.262893839	5.80E-01	5.00	32	2	PURA	HMGA1
GO	organonitrogen compound catabolic process	0.023182878	0.262310925	5.81E-01	5.00	32	2	BACE1	MTOR
GO	I-kappaB kinase/NF-kappaB signaling	0.023961322	0.27051909	5.68E-01	4.96	31	2	IKBKB	CHUK
GO	regulation of neurogenesis	0.023961322	0.269921917	5.69E-01	4.96	31	2	YAP1	BDNF
GO	regulation of Rho protein signal transduction	0.023961322	0.269327376	5.70E-01	4.96	31	2	ARHGDIA	RAF1
GO	regulated exocytosis	0.024473417	0.274478781	5.61E-01	4.16	18	3	APP	HGF	VEGFA
GO	positive regulation of cell morphogenesis involved in differentiation	0.02475041	0.276976624	5.58E-01	4.92	30	2	ARHGDIA	CAPRIN1
GO	response to light stimulus	0.02475041	0.276370548	5.59E-01	4.92	30	2	CDKN2D	MAPK8
GO	integrin-mediated signaling pathway	0.02475041	0.275767119	5.59E-01	4.92	30	2	ZYX	ADAM10
GO	regulation of G2/M transition of mitotic cell cycle	0.024902355	0.276855598	5.58E-01	4.15	18	3	CDK6	CCND1	MAPRE1
GO	type B pancreatic cell development	0.024939792	0.276669044	5.58E-01	7.19	146	1	CDK6
GO	definitive hemopoiesis	0.024939792	0.276068894	5.59E-01	7.19	146	1	HIPK1
GO	regulation of oxidative stress-induced neuron intrinsic apoptotic signaling pathway	0.024939792	0.275471342	5.60E-01	7.19	146	1	FBXW7
GO	positive regulation of axon guidance	0.024939792	0.274876372	5.61E-01	7.19	146	1	VEGFA
GO	positive regulation of adaptive immune response	0.024939792	0.274283966	5.62E-01	7.19	146	1	SIRT1
GO	white fat cell differentiation	0.024939792	0.273694108	5.63E-01	7.19	146	1	SIRT1
GO	regulation of macrophage apoptotic process	0.024939792	0.273106781	5.64E-01	7.19	146	1	SIRT1
GO	neuron projection maintenance	0.024939792	0.27252197	5.65E-01	7.19	146	1	APP
GO	regulation of endothelial cell development	0.024939792	0.271939658	5.66E-01	7.19	146	1	IKBKB
GO	protein insertion into mitochondrial membrane involved in apoptotic signaling pathway	0.024939792	0.27135983	5.66E-01	7.19	146	1	BCL2L11
GO	mesodermal cell fate commitment	0.024939792	0.270782468	5.67E-01	7.19	146	1	KLF4
GO	negative regulation of cytoplasmic translation	0.024939792	0.270207559	5.68E-01	7.19	146	1	CPEB2
GO	intracellular pH elevation	0.024939792	0.269635085	5.69E-01	7.19	146	1	BCL2
GO	dosage compensation by inactivation of X chromosome	0.024939792	0.269065032	5.70E-01	7.19	146	1	PCGF5
GO	positive regulation of microglial cell activation	0.024939792	0.268497384	5.71E-01	7.19	146	1	APP
GO	prepulse inhibition	0.024939792	0.267932126	5.72E-01	7.19	146	1	PTEN
GO	negative regulation of systemic arterial blood pressure	0.024939792	0.267369244	5.73E-01	7.19	146	1	BMPR2
GO	cellular triglyceride homeostasis	0.024939792	0.266808721	5.74E-01	7.19	146	1	SIRT1
GO	positive regulation of activin receptor signaling pathway	0.024939792	0.266250544	5.75E-01	7.19	146	1	ACVR2A
GO	positive regulation of receptor binding	0.024939792	0.265694697	5.76E-01	7.19	146	1	BDNF
GO	positive regulation of extrinsic apoptotic signaling pathway via death domain receptors	0.024939792	0.265141167	5.77E-01	7.19	146	1	PTEN
GO	positive regulation of interferon-alpha secretion	0.024939792	0.264589938	5.77E-01	7.19	146	1	CHUK
GO	positive regulation of keratinocyte migration	0.024939792	0.264040996	5.78E-01	7.19	146	1	MTOR
GO	vascular smooth muscle cell development	0.024939792	0.263494327	5.79E-01	7.19	146	1	VEGFA
GO	rRNA transport	0.024939792	0.262949918	5.80E-01	7.19	146	1	TSC1
GO	monoamine transport	0.024939792	0.262407753	5.81E-01	7.19	146	1	SLC6A4
GO	venous blood vessel morphogenesis	0.024939792	0.261867819	5.82E-01	7.19	146	1	VEGFA
GO	regulation of histone deacetylase activity	0.024939792	0.261330103	5.83E-01	7.19	146	1	VEGFA
GO	surfactant homeostasis	0.024939792	0.26079459	5.84E-01	7.19	146	1	VEGFA
GO	positive regulation of intracellular estrogen receptor signaling pathway	0.024939792	0.260261268	5.85E-01	7.19	146	1	YAP1
GO	negative regulation of dendritic spine development	0.024939792	0.259730123	5.85E-01	7.19	146	1	PTEN
GO	astrocyte differentiation	0.024939792	0.259201141	5.86E-01	7.19	146	1	CDK6
GO	glandular epithelial cell development	0.024939792	0.258674309	5.87E-01	7.19	146	1	CDK6
GO	negative regulation of cell size	0.024939792	0.258149615	5.88E-01	7.19	146	1	PTEN
GO	chondrocyte development	0.024939792	0.257627045	5.89E-01	7.19	146	1	BMPR2
GO	astrocyte activation	0.024939792	0.257106586	5.90E-01	7.19	146	1	APP
GO	single strand break repair	0.024939792	0.256588226	5.91E-01	7.19	146	1	SIRT1
GO	chemical homeostasis within a tissue	0.024939792	0.256071952	5.92E-01	7.19	146	1	VEGFA
GO	regulation of interferon-alpha secretion	0.024939792	0.255557751	5.93E-01	7.19	146	1	CHUK
GO	regulation of osteoclast development	0.024939792	0.255045611	5.93E-01	7.19	146	1	FBXW7
GO	response to UV-A	0.024939792	0.25453552	5.94E-01	7.19	146	1	CCND1
GO	dendritic spine maintenance	0.024939792	0.254027465	5.95E-01	7.19	146	1	IGF1R
GO	neuron remodeling	0.024939792	0.253521434	5.96E-01	7.19	146	1	APP
GO	regulation of pathway-restricted SMAD protein phosphorylation	0.025550039	0.259208448	5.86E-01	4.89	30	2	BMPR2	ACVR2A
GO	protein stabilization	0.026213537	0.265412065	5.76E-01	4.10	17	3	FBXW7	PTEN	TSC1
GO	cell chemotaxis	0.02636011	0.266367609	5.75E-01	4.85	29	2	HGF	VEGFA
GO	positive regulation of protein binding	0.02636011	0.265841191	5.75E-01	4.85	29	2	APP	BDNF
GO	negative regulation of MAP kinase activity	0.027180524	0.273574385	5.63E-01	4.81	28	2	DUSP10	HIPK3
GO	positive regulation of leukocyte chemotaxis	0.027180524	0.273035852	5.64E-01	4.81	28	2	ADAM10	VEGFA
GO	cellular response to oxygen-containing compound	0.028327881	0.284002315	5.47E-01	3.63	12	4	MAPK8	CHUK	MAPK1	MTOR
GO	synapse assembly	0.028851983	0.288689546	5.40E-01	4.74	27	2	BDNF	PTEN
GO	negative regulation of protein modification process	0.028851983	0.288124596	5.40E-01	4.74	27	2	PTEN	SIRT1
GO	negative regulation of neuron apoptotic process	0.028851983	0.287561852	5.41E-01	4.74	27	2	BDNF	BCL2
GO	regulation of cyclic nucleotide metabolic process	0.02903626	0.288834373	5.39E-01	6.91	120	1	VEGFA
GO	inositol phosphate dephosphorylation	0.02903626	0.288272438	5.40E-01	6.91	120	1	PTEN
GO	regulation of collateral sprouting	0.02903626	0.287712686	5.41E-01	6.91	120	1	BDNF
GO	positive regulation of dendritic spine morphogenesis	0.02903626	0.287155103	5.42E-01	6.91	120	1	CAPRIN1
GO	venous blood vessel development	0.02903626	0.286599678	5.43E-01	6.91	120	1	BMPR2
GO	negative regulation of production of miRNAs involved in gene silencing by miRNA	0.02903626	0.286046396	5.44E-01	6.91	120	1	NCOR2
GO	positive regulation of protein kinase A signaling	0.02903626	0.285495247	5.44E-01	6.91	120	1	MIF
GO	progesterone receptor signaling pathway	0.02903626	0.284946218	5.45E-01	6.91	120	1	YAP1
GO	peptidyl-lysine deacetylation	0.02903626	0.284399296	5.46E-01	6.91	120	1	SIRT1
GO	regulation of myosin-light-chain-phosphatase activity	0.02903626	0.28385447	5.47E-01	6.91	120	1	IKBKB
GO	negative regulation of cardiocyte differentiation	0.02903626	0.283311727	5.48E-01	6.91	120	1	SOX6
GO	rRNA-containing ribonucleoprotein complex export from nucleus	0.02903626	0.282771056	5.49E-01	6.91	120	1	TSC1
GO	postsynaptic density assembly	0.02903626	0.282232445	5.49E-01	6.91	120	1	PTEN
GO	regulation of DNA endoreduplication	0.02903626	0.281695881	5.50E-01	6.91	120	1	FBXW7
GO	positive regulation of neuroblast proliferation	0.02903626	0.281161354	5.51E-01	6.91	120	1	VEGFA
GO	mitral valve development	0.02903626	0.280628851	5.52E-01	6.91	120	1	BMPR2
GO	regulation of endothelial cell chemotaxis to fibroblast growth factor	0.02903626	0.280098362	5.53E-01	6.91	120	1	FGFR1
GO	pri-miRNA transcription from RNA polymerase II promoter	0.02903626	0.279569874	5.54E-01	6.91	120	1	KLF4
GO	positive regulation of protein kinase C signaling	0.02903626	0.279043377	5.54E-01	6.91	120	1	VEGFA
GO	negative regulation of type 2 immune response	0.02903626	0.27851886	5.55E-01	6.91	120	1	SOCS5
GO	pharyngeal arch artery morphogenesis	0.02903626	0.27799631	5.56E-01	6.91	120	1	BMPR2
GO	wound healing, spreading of epidermal cells	0.02903626	0.277475718	5.57E-01	6.91	120	1	ITGA5
GO	negative regulation of cardiac muscle cell differentiation	0.02903626	0.276957072	5.58E-01	6.91	120	1	SOX6
GO	positive regulation of insulin receptor signaling pathway	0.02903626	0.276440361	5.58E-01	6.91	120	1	SIRT1
GO	cellular response to leptin stimulus	0.02903626	0.275925574	5.59E-01	6.91	120	1	SIRT1
GO	positive regulation of blood vessel endothelial cell proliferation involved in sprouting angiogenesis	0.02903626	0.275412701	5.60E-01	6.91	120	1	VEGFA
GO	lymphatic endothelial cell differentiation	0.02903626	0.274901732	5.61E-01	6.91	120	1	BMPR2
GO	regulation of T-helper 1 cell differentiation	0.02903626	0.274392654	5.62E-01	6.91	120	1	SOCS5
GO	negative regulation of dendrite morphogenesis	0.02903626	0.273885459	5.62E-01	6.91	120	1	PTEN
GO	central nervous system neuron axonogenesis	0.02903626	0.273380135	5.63E-01	6.91	120	1	PTEN
GO	positive regulation of membrane depolarization	0.02903626	0.272876673	5.64E-01	6.91	120	1	KDR
GO	regulation of microtubule binding	0.02903626	0.272375061	5.65E-01	6.91	120	1	MAPRE1
GO	regulation of microglial cell activation	0.02903626	0.271875291	5.66E-01	6.91	120	1	APP
GO	positive regulation of myeloid cell apoptotic process	0.02903626	0.27137735	5.66E-01	6.91	120	1	SIRT1
GO	phosphorylated carbohydrate dephosphorylation	0.02903626	0.270881231	5.67E-01	6.91	120	1	PTEN
GO	negative regulation of cardiac muscle tissue development	0.02903626	0.270386922	5.68E-01	6.91	120	1	SOX6
GO	regulation of protein heterodimerization activity	0.02903626	0.269894414	5.69E-01	6.91	120	1	BCL2
GO	vascular endothelial growth factor signaling pathway	0.02903626	0.269403697	5.70E-01	6.91	120	1	VEGFA
GO	negative regulation of neuron differentiation	0.029702832	0.275088119	5.61E-01	4.71	26	2	MYLIP	HDAC2
GO	positive regulation of cell adhesion	0.029702832	0.274589771	5.61E-01	4.71	26	2	ARL2	VEGFA
GO	DNA synthesis involved in DNA repair	0.030563632	0.282036555	5.50E-01	4.68	26	2	CDKN2D	SIRT1
GO	regulation of myeloid cell differentiation	0.030563632	0.281527464	5.50E-01	4.68	26	2	KAT2B	CDK6
GO	negative regulation of apoptotic signaling pathway	0.030563632	0.281020207	5.51E-01	4.68	26	2	HGF	BCL2
GO	negative regulation of cell adhesion	0.030563632	0.280514775	5.52E-01	4.68	26	2	ARHGDIA	ADAM10
GO	neuron projection morphogenesis	0.031333122	0.287060902	5.42E-01	3.92	15	3	APP	BDNF	PTEN
GO	positive regulation of I-kappaB kinase/NF-kappaB signaling	0.031333122	0.286546456	5.43E-01	3.92	15	3	IKBKB	APP	CHUK
GO	protein polyubiquitination	0.03136949	0.286365847	5.43E-01	3.54	12	4	MYLIP	FBXW7	BCL2	RFFL
GO	intracellular steroid hormone receptor signaling pathway	0.031434286	0.286444931	5.43E-01	4.64	25	2	YAP1	ESR2
GO	JNK cascade	0.031434286	0.285934334	5.44E-01	4.64	25	2	MAP2K4	MAPK8
GO	extrinsic apoptotic signaling pathway	0.032314698	0.293419757	5.33E-01	4.61	24	2	BCL2	HIPK1
GO	positive regulation of synaptic transmission	0.032314698	0.292898585	5.33E-01	4.61	24	2	APP	PTEN
GO	negative regulation of protein binding	0.032314698	0.292379261	5.34E-01	4.61	24	2	MAPK8	MAPRE1
GO	positive regulation of autophagy	0.032314698	0.291861776	5.35E-01	4.61	24	2	KDR	SIRT1
GO	cellular response to UV	0.032314698	0.291346119	5.36E-01	4.61	24	2	SIRT1	TP63
GO	protein insertion into mitochondrial membrane	0.033115722	0.298041499	5.26E-01	6.66	101	1	BCL2L11
GO	positive regulation of vasculogenesis	0.033115722	0.297516778	5.26E-01	6.66	101	1	KDR
GO	regulation of stress-activated protein kinase signaling cascade	0.033115722	0.296993901	5.27E-01	6.66	101	1	MAPK1
GO	histone H2A-K119 monoubiquitination	0.033115722	0.296472859	5.28E-01	6.66	101	1	PCGF5
GO	regulation of brown fat cell differentiation	0.033115722	0.295953642	5.29E-01	6.66	101	1	SIRT1
GO	stress-induced premature senescence	0.033115722	0.295436241	5.30E-01	6.66	101	1	SIRT1
GO	myelin maintenance	0.033115722	0.294920645	5.30E-01	6.66	101	1	PTEN
GO	establishment of integrated proviral latency	0.033115722	0.294406846	5.31E-01	6.66	101	1	HMGA1
GO	leptin-mediated signaling pathway	0.033115722	0.293894834	5.32E-01	6.66	101	1	SIRT1
GO	amyloid fibril formation	0.033115722	0.2933846	5.33E-01	6.66	101	1	APP
GO	negative regulation of potassium ion transmembrane transporter activity	0.033115722	0.292876135	5.33E-01	6.66	101	1	CAB39
GO	monocyte activation	0.033115722	0.292369429	5.34E-01	6.66	101	1	ADAM10
GO	coronary vasculature morphogenesis	0.033115722	0.291864473	5.35E-01	6.66	101	1	VEGFA
GO	negative regulation of T-helper cell differentiation	0.033115722	0.291361258	5.36E-01	6.66	101	1	SOCS5
GO	negative regulation of execution phase of apoptosis	0.033115722	0.290859776	5.36E-01	6.66	101	1	RFFL
GO	negative regulation of cAMP-dependent protein kinase activity	0.033115722	0.290360017	5.37E-01	6.66	101	1	SIRT1
GO	regulation of smooth muscle cell apoptotic process	0.033115722	0.289861972	5.38E-01	6.66	101	1	SIRT1
GO	protein localization to microtubule	0.033115722	0.289365633	5.39E-01	6.66	101	1	MAPRE1
GO	regulation of endodeoxyribonuclease activity	0.033115722	0.288870991	5.39E-01	6.66	101	1	SIRT1
GO	phagolysosome assembly	0.033115722	0.288378037	5.40E-01	6.66	101	1	RAB14
GO	regulation of T-helper 2 cell differentiation	0.033115722	0.287886763	5.41E-01	6.66	101	1	SOCS5
GO	regulation of amyloid fibril formation	0.033115722	0.287397159	5.42E-01	6.66	101	1	APP
GO	excitatory synapse assembly	0.033115722	0.286909219	5.42E-01	6.66	101	1	PTEN
GO	positive regulation of chromatin silencing	0.033115722	0.286422932	5.43E-01	6.66	101	1	SIRT1
GO	regulation of cytoplasmic transport	0.033115722	0.285938291	5.44E-01	6.66	101	1	MAPK1
GO	central nervous system myelination	0.033115722	0.285455287	5.44E-01	6.66	101	1	PTEN
GO	TORC1 signaling	0.033115722	0.284973912	5.45E-01	6.66	101	1	MTOR
GO	positive regulation of IRE1-mediated unfolded protein response	0.033115722	0.284494158	5.46E-01	6.66	101	1	BCL2L11
GO	depyrimidination	0.033115722	0.284016016	5.47E-01	6.66	101	1	UNG
GO	regulation of peroxisome proliferator activated receptor signaling pathway	0.033115722	0.283539479	5.47E-01	6.66	101	1	SIRT1
GO	protein localization to microtubule cytoskeleton	0.033115722	0.283064539	5.48E-01	6.66	101	1	MAPRE1
GO	negative regulation of centriole replication	0.033115722	0.282591187	5.49E-01	6.66	101	1	KAT2B
GO	histone H4 deacetylation	0.033115722	0.282119415	5.50E-01	6.66	101	1	HDAC2
GO	regulation of receptor binding	0.033115722	0.281649216	5.50E-01	6.66	101	1	BDNF
GO	response to vitamin D	0.033115722	0.281180582	5.51E-01	6.66	101	1	CDKN2D
GO	positive regulation of regulatory T cell differentiation	0.033115722	0.280713505	5.52E-01	6.66	101	1	DUSP10
GO	heterochromatin assembly	0.033115722	0.280247976	5.52E-01	6.66	101	1	HMGA1
GO	inositol phosphate catabolic process	0.033115722	0.27978399	5.53E-01	6.66	101	1	PTEN
GO	regulation of protein ADP-ribosylation	0.033115722	0.279321537	5.54E-01	6.66	101	1	KAT2B
GO	neuron projection development	0.033315776	0.280545221	5.52E-01	3.86	15	3	APP	BDNF	PTEN
GO	positive regulation of neurogenesis	0.034104416	0.286713071	5.43E-01	4.54	23	2	VEGFA	FGFR1
GO	regulation of endocytosis	0.034104416	0.286241504	5.43E-01	4.54	23	2	RAB14	RAB5A
GO	negative regulation of angiogenesis	0.034104416	0.285771485	5.44E-01	4.54	23	2	KLF4	KLF2
GO	Rab protein signal transduction	0.035013533	0.292908297	5.33E-01	4.51	23	2	RAB14	RAB5A
GO	positive regulation of protein kinase activity	0.035884214	0.299700727	5.23E-01	3.79	14	3	MAP2K4	CAB39	VEGFA
GO	actomyosin structure organization	0.035932032	0.299609737	5.23E-01	4.48	22	2	MYLIP	ZYX
GO	positive regulation of lymphocyte proliferation	0.035932032	0.299120977	5.24E-01	4.48	22	2	BCL2	MIF
GO	positive regulation of growth	0.035932032	0.29863381	5.25E-01	4.48	22	2	BCL2	ADAM10
GO	regulation of neuron death	0.036859819	0.305846593	5.14E-01	4.45	22	2	TSC1	TP63
GO	type B pancreatic cell differentiation	0.037178249	0.307987994	5.11E-01	6.44	87	1	CDK6
GO	positive regulation of transcription of nuclear large rRNA transcript from RNA polymerase I promoter	0.037178249	0.307488823	5.12E-01	6.44	87	1	MTOR
GO	negative regulation of leukocyte chemotaxis	0.037178249	0.306991269	5.13E-01	6.44	87	1	MIF
GO	regulation of protein acetylation	0.037178249	0.306495322	5.14E-01	6.44	87	1	SIRT1
GO	positive regulation of cell activation	0.037178249	0.306000974	5.14E-01	6.44	87	1	APP
GO	lactation	0.037178249	0.305508219	5.15E-01	6.44	87	1	VEGFA
GO	negative regulation of heterotypic cell-cell adhesion	0.037178249	0.305017048	5.16E-01	6.44	87	1	KLF4
GO	regulation of cell-cell adhesion involved in gastrulation	0.037178249	0.304527454	5.16E-01	6.44	87	1	KLF4
GO	neuron maturation	0.037178249	0.30403943	5.17E-01	6.44	87	1	APP
GO	regulation of bile acid biosynthetic process	0.037178249	0.303552966	5.18E-01	6.44	87	1	SIRT1
GO	anoikis	0.037178249	0.303068058	5.18E-01	6.44	87	1	MTOR
GO	endothelial cell chemotaxis	0.037178249	0.302584695	5.19E-01	6.44	87	1	VEGFA
GO	postsynaptic density organization	0.037178249	0.302102873	5.20E-01	6.44	87	1	PTEN
GO	negative regulation of catenin import into nucleus	0.037178249	0.301622582	5.21E-01	6.44	87	1	AXIN2
GO	regulation of leukocyte activation	0.037178249	0.301143816	5.21E-01	6.44	87	1	MIF
GO	cellular response to dopamine	0.037178249	0.300666567	5.22E-01	6.44	87	1	MAPK1
GO	positive regulation of nitric-oxide synthase biosynthetic process	0.037178249	0.300190829	5.23E-01	6.44	87	1	KDR
GO	ionotropic glutamate receptor signaling pathway	0.037178249	0.299716594	5.23E-01	6.44	87	1	APP
GO	positive regulation of long-term synaptic potentiation	0.037178249	0.299243855	5.24E-01	6.44	87	1	APP
GO	positive regulation of leukocyte apoptotic process	0.037178249	0.298772605	5.25E-01	6.44	87	1	SIRT1
GO	negative regulation of chromatin silencing	0.037178249	0.298302837	5.25E-01	6.44	87	1	HMGA1
GO	cellular response to leucine	0.037178249	0.297834543	5.26E-01	6.44	87	1	MTOR
GO	central nervous system neuron development	0.037178249	0.297367718	5.27E-01	6.44	87	1	PTEN
GO	response to dopamine	0.037178249	0.296902354	5.27E-01	6.44	87	1	MAPK1
GO	regulation of helicase activity	0.037178249	0.296438444	5.28E-01	6.44	87	1	SIRT1
GO	establishment of viral latency	0.037178249	0.295975981	5.29E-01	6.44	87	1	HMGA1
GO	mitral valve morphogenesis	0.037178249	0.29551496	5.29E-01	6.44	87	1	BMPR2
GO	positive regulation of protein homooligomerization	0.037178249	0.295055372	5.30E-01	6.44	87	1	BCL2L11
GO	negative regulation of potassium ion transmembrane transport	0.037178249	0.294597211	5.31E-01	6.44	87	1	CAB39
GO	response to leucine	0.037178249	0.294140471	5.31E-01	6.44	87	1	MTOR
GO	negative regulation of microtubule polymerization	0.037178249	0.293685146	5.32E-01	6.44	87	1	MAPRE1
GO	negative regulation of phosphatidylinositol 3-kinase signaling	0.037178249	0.293231227	5.33E-01	6.44	87	1	PTEN
GO	neuron projection organization	0.037178249	0.29277871	5.33E-01	6.44	87	1	APP
GO	positive regulation of T cell chemotaxis	0.037178249	0.292327587	5.34E-01	6.44	87	1	ADAM10
GO	fatty acid homeostasis	0.037178249	0.291877852	5.35E-01	6.44	87	1	SIRT1
GO	positive regulation of astrocyte differentiation	0.037178249	0.291429499	5.35E-01	6.44	87	1	APP
GO	positive regulation of phosphorylation of RNA polymerase II C-terminal domain	0.037178249	0.290982521	5.36E-01	6.44	87	1	CCNT2
GO	negative regulation of peptidyl-lysine acetylation	0.037178249	0.290536913	5.37E-01	6.44	87	1	SIRT1
GO	response to vitamin	0.037178249	0.290092667	5.37E-01	6.44	87	1	CDKN2D
GO	canonical Wnt signaling pathway	0.037796801	0.294468821	5.31E-01	4.42	21	2	PTEN	RAB5A
GO	regulation of protein complex assembly	0.037796801	0.294019936	5.32E-01	4.42	21	2	RAF1	VEGFA
GO	positive regulation of proteasomal protein catabolic process	0.037796801	0.293572417	5.32E-01	4.42	21	2	FBXW7	SOCS5
GO	regulation of gene expression, epigenetic	0.038742889	0.300463466	5.22E-01	4.39	21	2	KAT2B	PPM1D
GO	antigen processing and presentation of exogenous peptide antigen via MHC class I, TAP-dependent	0.039697989	0.307403398	5.12E-01	4.36	20	2	IKBKB	CHUK
GO	negative regulation of cellular amide metabolic process	0.039697989	0.306937636	5.13E-01	4.36	20	2	CAPRIN1	TSC1
GO	positive regulation of apoptotic process	0.040392231	0.311832914	5.06E-01	3.32	10	4	MAPK8	BCL2L11	SIRT1	TP63
GO	transforming growth factor beta receptor signaling pathway	0.040662013	0.313441469	5.04E-01	4.33	20	2	ZYX	SIRT1
GO	negative regulation of extrinsic apoptotic signaling pathway	0.040662013	0.312968707	5.04E-01	4.33	20	2	BCL2	RFFL
GO	regulation of hematopoietic stem cell differentiation	0.040662013	0.312497368	5.05E-01	4.33	20	2	YAP1	MYB
GO	positive regulation of apoptotic signaling pathway	0.040662013	0.312027447	5.06E-01	4.33	20	2	BCL2L11	BCL2
GO	hemopoiesis	0.040662013	0.311558938	5.06E-01	4.33	20	2	KDR	HIPK1
GO	positive regulation of epidermal growth factor-activated receptor activity	0.041223909	0.315390719	5.01E-01	6.25	76	1	FBXW7
GO	negative regulation of response to cytokine stimulus	0.041223909	0.314918578	5.02E-01	6.25	76	1	KLF4
GO	induction of positive chemotaxis	0.041223909	0.314447847	5.02E-01	6.25	76	1	VEGFA
GO	cardiovascular system development	0.041223909	0.313978522	5.03E-01	6.25	76	1	FBXW7
GO	regulation of phospholipase C activity	0.041223909	0.313510596	5.04E-01	6.25	76	1	FGFR1
GO	low-density lipoprotein particle receptor catabolic process	0.041223909	0.313044062	5.04E-01	6.25	76	1	MYLIP
GO	endothelium development	0.041223909	0.312578915	5.05E-01	6.25	76	1	KDR
GO	regulation of myeloid leukocyte differentiation	0.041223909	0.312115148	5.06E-01	6.25	76	1	MTOR
GO	negative regulation of centrosome duplication	0.041223909	0.311652755	5.06E-01	6.25	76	1	KAT2B
GO	positive regulation of transcription from RNA polymerase III promoter	0.041223909	0.31119173	5.07E-01	6.25	76	1	MTOR
GO	regulation of gene expression by genetic imprinting	0.041223909	0.310732068	5.08E-01	6.25	76	1	PCGF5
GO	regulation of cytoplasmic translational elongation	0.041223909	0.310273761	5.08E-01	6.25	76	1	CPEB2
GO	phosphatidylglycerol biosynthetic process	0.041223909	0.309816804	5.09E-01	6.25	76	1	CDS2
GO	presynaptic membrane assembly	0.041223909	0.309361191	5.10E-01	6.25	76	1	PTEN
GO	positive regulation of amyloid-beta formation	0.041223909	0.308906916	5.10E-01	6.25	76	1	APP
GO	contractile actin filament bundle assembly	0.041223909	0.308453973	5.11E-01	6.25	76	1	ZYX
GO	mesoderm morphogenesis	0.041223909	0.308002357	5.11E-01	6.25	76	1	BMPR2
GO	regulation of phospholipase activity	0.041223909	0.307552061	5.12E-01	6.25	76	1	FGFR1
GO	nerve growth factor signaling pathway	0.041223909	0.30710308	5.13E-01	6.25	76	1	BDNF
GO	I-kappaB phosphorylation	0.041223909	0.306655408	5.13E-01	6.25	76	1	CHUK
GO	cellular copper ion homeostasis	0.041223909	0.306209039	5.14E-01	6.25	76	1	APP
GO	base-excision repair, AP site formation	0.041223909	0.305763968	5.15E-01	6.25	76	1	UNG
GO	positive regulation of intracellular steroid hormone receptor signaling pathway	0.041223909	0.305320188	5.15E-01	6.25	76	1	YAP1
GO	stress fiber assembly	0.041223909	0.304877695	5.16E-01	6.25	76	1	ZYX
GO	positive regulation of lipase activity	0.041223909	0.304436483	5.17E-01	6.25	76	1	FGFR1
GO	negative regulation of gene silencing by miRNA	0.041223909	0.303996546	5.17E-01	6.25	76	1	NCOR2
GO	cellular response to leucine starvation	0.041223909	0.303557878	5.18E-01	6.25	76	1	MTOR
GO	regulation of neuroblast proliferation	0.041223909	0.303120475	5.18E-01	6.25	76	1	VEGFA
GO	regulation of cytoplasmic translation	0.041223909	0.302684331	5.19E-01	6.25	76	1	CPEB2
GO	insulin-like growth factor receptor signaling pathway	0.041223909	0.302249439	5.20E-01	6.25	76	1	IGF1R
GO	regulation of T cell chemotaxis	0.041223909	0.301815796	5.20E-01	6.25	76	1	ADAM10
GO	response to ionizing radiation	0.04163487	0.304387881	5.17E-01	4.30	20	2	SIRT1	TP63
GO	regulation of hematopoietic progenitor cell differentiation	0.04163487	0.30395242	5.17E-01	4.30	20	2	YAP1	MYB
GO	phosphate-containing compound metabolic process	0.041884015	0.305334466	5.15E-01	3.63	12	3	DUSP10	PTEN	MTOR
GO	antigen processing and presentation of exogenous peptide antigen via MHC class I	0.042616471	0.310230885	5.08E-01	4.27	19	2	IKBKB	CHUK
GO	positive regulation of translation	0.042616471	0.309788961	5.09E-01	4.27	19	2	RPS6KB1	MTOR
GO	nervous system development	0.042652122	0.309607078	5.09E-01	3.05	8	5	MYLIP	BDNF	PTEN	VEGFA	FGFR1
GO	negative regulation of mitotic cell cycle phase transition	0.043606727	0.31608683	5.00E-01	4.24	19	2	PTEN	KLF4
GO	positive regulation of stress-activated MAPK cascade	0.04460555	0.322868261	4.91E-01	4.21	19	2	APP	VEGFA
GO	ERBB signaling pathway	0.04460555	0.322410941	4.92E-01	4.21	19	2	MAPK1	KRAS
GO	negative regulation of morphogenesis of an epithelium	0.045252773	0.326626449	4.86E-01	6.07	67	1	PTEN
GO	atrial septum morphogenesis	0.045252773	0.326165112	4.87E-01	6.07	67	1	BMPR2
GO	negative regulation of potassium ion transport	0.045252773	0.325705077	4.87E-01	6.07	67	1	CAB39
GO	mononuclear cell differentiation	0.045252773	0.325246337	4.88E-01	6.07	67	1	VEGFA
GO	camera-type eye morphogenesis	0.045252773	0.324788888	4.88E-01	6.07	67	1	VEGFA
GO	UV-damage excision repair	0.045252773	0.324332724	4.89E-01	6.07	67	1	SIRT1
GO	photoreceptor cell development	0.045252773	0.323877839	4.90E-01	6.07	67	1	VEGFA
GO	regulation of synaptic vesicle cycle	0.045252773	0.323424229	4.90E-01	6.07	67	1	RAB5A
GO	negative regulation of fatty acid biosynthetic process	0.045252773	0.322971887	4.91E-01	6.07	67	1	SIRT1
GO	positive regulation of receptor biosynthetic process	0.045252773	0.322520809	4.91E-01	6.07	67	1	HDAC2
GO	chromatin silencing at rDNA	0.045252773	0.322070989	4.92E-01	6.07	67	1	SIRT1
GO	methylation-dependent chromatin silencing	0.045252773	0.321622423	4.93E-01	6.07	67	1	SIRT1
GO	positive regulation of histone deacetylation	0.045252773	0.321175104	4.93E-01	6.07	67	1	VEGFA
GO	low-density lipoprotein receptor particle metabolic process	0.045252773	0.320729027	4.94E-01	6.07	67	1	MYLIP
GO	regulation of protein kinase C signaling	0.045252773	0.320284188	4.94E-01	6.07	67	1	VEGFA
GO	internal protein amino acid acetylation	0.045252773	0.319840581	4.95E-01	6.07	67	1	KAT2B
GO	phosphatidylinositol dephosphorylation	0.045252773	0.319398201	4.96E-01	6.07	67	1	PTEN
GO	regulation of cardiac muscle cell differentiation	0.045252773	0.318957043	4.96E-01	6.07	67	1	SOX6
GO	embryonic hemopoiesis	0.045252773	0.318517103	4.97E-01	6.07	67	1	KDR
GO	negative regulation of myotube differentiation	0.045252773	0.318078374	4.97E-01	6.07	67	1	BDNF
GO	regulation of phosphorylation of RNA polymerase II C-terminal domain	0.045252773	0.317640852	4.98E-01	6.07	67	1	CCNT2
GO	monocyte differentiation	0.045252773	0.317204532	4.99E-01	6.07	67	1	VEGFA
GO	positive regulation of mesenchymal cell proliferation	0.045252773	0.316769409	4.99E-01	6.07	67	1	VEGFA
GO	positive regulation of chromosome segregation	0.045252773	0.316335479	5.00E-01	6.07	67	1	RAD21
GO	regulation of receptor biosynthetic process	0.045252773	0.315902735	5.00E-01	6.07	67	1	HDAC2
GO	presynaptic membrane organization	0.045252773	0.315471174	5.01E-01	6.07	67	1	PTEN
GO	negative regulation of histone acetylation	0.045252773	0.315040791	5.02E-01	6.07	67	1	SIRT1
GO	transcytosis	0.045252773	0.31461158	5.02E-01	6.07	67	1	RAB5A
GO	regulation of blood vessel endothelial cell proliferation involved in sprouting angiogenesis	0.045252773	0.314183537	5.03E-01	6.07	67	1	VEGFA
GO	hepatocyte growth factor receptor signaling pathway	0.045252773	0.313756657	5.03E-01	6.07	67	1	HGF
GO	protein catabolic process	0.045612854	0.315824141	5.01E-01	4.18	18	2	BACE1	MTOR
GO	BMP signaling pathway	0.045612854	0.315396195	5.01E-01	4.18	18	2	BMPR2	ACVR2A
GO	positive regulation of protein secretion	0.04662855	0.321983069	4.92E-01	4.15	18	2	CADM1	MIF
GO	positive regulation of transmembrane receptor protein serine/threonine kinase signaling pathway	0.04662855	0.321547957	4.93E-01	4.15	18	2	BMPR2	ACVR2A
GO	negative regulation of neuron death	0.047652552	0.328165954	4.84E-01	4.13	17	2	BDNF	BCL2
GO	positive regulation of protein ubiquitination	0.047652552	0.327723682	4.84E-01	4.13	17	2	FBXW7	PTEN
GO	cellular response to tumor necrosis factor	0.04835663	0.332118284	4.79E-01	3.48	11	3	IKBKB	CHUK	SIRT1
GO	regulation of cell cycle G2/M phase transition	0.048684775	0.333922587	4.76E-01	4.10	17	2	CDK6	MAPRE1
GO	regulation of systemic arterial blood pressure	0.049264908	0.337448086	4.72E-01	5.90	60	1	BMPR2
GO	regulation of mesenchymal cell proliferation	0.049264908	0.336995743	4.72E-01	5.90	60	1	VEGFA
GO	regulation of vasculogenesis	0.049264908	0.336544611	4.73E-01	5.90	60	1	KDR
GO	regulation of nitric-oxide synthase biosynthetic process	0.049264908	0.336094685	4.74E-01	5.90	60	1	KDR
GO	regulation of transcription of nuclear large rRNA transcript from RNA polymerase I promoter	0.049264908	0.33564596	4.74E-01	5.90	60	1	MTOR
GO	regulation of protein glycosylation	0.049264908	0.335198432	4.75E-01	5.90	60	1	KAT2B
GO	regulation of IRE1-mediated unfolded protein response	0.049264908	0.334752096	4.75E-01	5.90	60	1	BCL2L11
GO	regulation of protein import into nucleus, translocation	0.049264908	0.334306947	4.76E-01	5.90	60	1	SIRT1
GO	mitochondrial outer membrane permeabilization	0.049264908	0.33386298	4.76E-01	5.90	60	1	BCL2L11
GO	viral RNA genome replication	0.049264908	0.333420191	4.77E-01	5.90	60	1	RAB5A
GO	endochondral bone morphogenesis	0.049264908	0.332978575	4.78E-01	5.90	60	1	BMPR2
GO	cellular response to arsenic-containing substance	0.049264908	0.332538127	4.78E-01	5.90	60	1	CPEB2
GO	histone arginine methylation	0.049264908	0.332098843	4.79E-01	5.90	60	1	PRDM4
GO	cardiac muscle fiber development	0.049264908	0.331660718	4.79E-01	5.90	60	1	VEGFA
GO	positive regulation of endoplasmic reticulum unfolded protein response	0.049264908	0.331223747	4.80E-01	5.90	60	1	BCL2L11
GO	regulation of actomyosin structure organization	0.049264908	0.330787927	4.80E-01	5.90	60	1	TSC1
GO	positive regulation of T-helper 1 type immune response	0.049264908	0.330353251	4.81E-01	5.90	60	1	SOCS5
GO	positive regulation of cyclase activity	0.049264908	0.329919717	4.82E-01	5.90	60	1	MAPK8
GO	positive regulation of amyloid precursor protein catabolic process	0.049264908	0.329487319	4.82E-01	5.90	60	1	APP
GO	pyrimidine deoxyribonucleotide catabolic process	0.049264908	0.329056053	4.83E-01	5.90	60	1	UNG
GO	positive regulation of branching involved in ureteric bud morphogenesis	0.049264908	0.328625914	4.83E-01	5.90	60	1	VEGFA
GO	eye photoreceptor cell development	0.049264908	0.328196898	4.84E-01	5.90	60	1	VEGFA
GO	negative regulation of androgen receptor signaling pathway	0.049264908	0.327769001	4.84E-01	5.90	60	1	SIRT1
GO	regulation of interleukin-8 biosynthetic process	0.049264908	0.327342219	4.85E-01	5.90	60	1	KLF4
GO	regulation of establishment of endothelial barrier	0.049264908	0.326916546	4.86E-01	5.90	60	1	IKBKB
GO	eye photoreceptor cell differentiation	0.049264908	0.326491979	4.86E-01	5.90	60	1	VEGFA
GO	regulation of cellular macromolecule biosynthetic process	0.049549192	0.327950102	4.84E-01	2.77	7	6	APP	MYB	HMGA1	TSC1	SOX6	ESR2
GO	toll-like receptor signaling pathway	0.050773541	0.33561837	4.74E-01	4.04	17	2	IKBKB	CHUK
GO	neutrophil degranulation	0.051146424	0.337645801	4.72E-01	2.89	7	5	CAB39	RAB14	ADAM10	MAPK1	MIF
GO	cellular response to BMP stimulus	0.051829917	0.341715845	4.66E-01	4.02	16	2	BMPR2	ACVR2A
GO	positive regulation of cellular component biogenesis	0.051829917	0.341274922	4.67E-01	4.02	16	2	BDNF	VEGFA
GO	positive regulation of protein ubiquitination involved in ubiquitin-dependent protein catabolic process	0.051829917	0.340835134	4.67E-01	4.02	16	2	FBXW7	PTEN
GO	neutrophil activation involved in immune response	0.052652467	0.345798634	4.61E-01	2.86	7	5	CAB39	RAB14	ADAM10	MAPK1	MIF
GO	regulation of stem cell differentiation	0.052894175	0.346939553	4.60E-01	3.99	16	2	YAP1	MYB
GO	positive regulation of protein complex assembly	0.052894175	0.346494188	4.60E-01	3.99	16	2	TPPP3	VEGFA
GO	response to iron ion	0.053260383	0.348445812	4.58E-01	5.75	54	1	BCL2
GO	positive regulation of histone H3-K4 methylation	0.053260383	0.347999659	4.58E-01	5.75	54	1	MYB
GO	regulation of plasma membrane bounded cell projection organization	0.053260383	0.347554647	4.59E-01	5.75	54	1	PTEN
GO	mitochondrial genome maintenance	0.053260383	0.347110771	4.60E-01	5.75	54	1	AKT3
GO	prostanoid biosynthetic process	0.053260383	0.346668028	4.60E-01	5.75	54	1	MIF
GO	positive regulation of cardiac muscle cell proliferation	0.053260383	0.346226412	4.61E-01	5.75	54	1	PIM1
GO	regulation of NMDA receptor activity	0.053260383	0.345785921	4.61E-01	5.75	54	1	APP
GO	regulation of cell aging	0.053260383	0.345346548	4.62E-01	5.75	54	1	MIF
GO	Notch receptor processing, ligand-dependent	0.053260383	0.344908291	4.62E-01	5.75	54	1	ADAM10
GO	regulation of cAMP-dependent protein kinase activity	0.053260383	0.344471145	4.63E-01	5.75	54	1	SIRT1
GO	synaptic vesicle cycle	0.053260383	0.344035106	4.63E-01	5.75	54	1	RAB5A
GO	negative regulation of epidermal growth factor-activated receptor activity	0.053260383	0.343600169	4.64E-01	5.75	54	1	SOCS5
GO	negative regulation of blood pressure	0.053260383	0.34316633	4.64E-01	5.75	54	1	BMPR2
GO	regulation of triglyceride biosynthetic process	0.053260383	0.342733586	4.65E-01	5.75	54	1	FBXW7
GO	DNA damage response, signal transduction by p53 class mediator resulting in transcription of p21 class mediator	0.053260383	0.342301932	4.66E-01	5.75	54	1	TP63
GO	atrial septum development	0.053260383	0.341871363	4.66E-01	5.75	54	1	BMPR2
GO	regulation of production of miRNAs involved in gene silencing by miRNA	0.053260383	0.341441876	4.67E-01	5.75	54	1	NCOR2
GO	positive regulation of cholesterol efflux	0.053260383	0.341013468	4.67E-01	5.75	54	1	SIRT1
GO	regulation of axon guidance	0.053260383	0.340586132	4.68E-01	5.75	54	1	VEGFA
GO	positive regulation of protein complex disassembly	0.053260383	0.340159867	4.68E-01	5.75	54	1	IGF1R
GO	copper ion homeostasis	0.053260383	0.339734667	4.69E-01	5.75	54	1	APP
GO	regulation of leukocyte migration	0.053260383	0.339310529	4.69E-01	5.75	54	1	VEGFA
GO	negative regulation of chemokine production	0.053260383	0.338887448	4.70E-01	5.75	54	1	KLF4
GO	endothelial cell differentiation	0.053260383	0.338465422	4.70E-01	5.75	54	1	BMPR2
GO	leukocyte differentiation	0.053260383	0.338044445	4.71E-01	5.75	54	1	IKZF1
GO	regulation of synaptic vesicle transport	0.053260383	0.337624514	4.72E-01	5.75	54	1	RAB5A
GO	regulation of cellular carbohydrate metabolic process	0.053260383	0.337205625	4.72E-01	5.75	54	1	SIRT1
GO	negative regulation of cellular protein metabolic process	0.053966232	0.341251156	4.67E-01	3.97	16	2	CAPRIN1	TSC1
GO	neutrophil mediated immunity	0.054184393	0.34220663	4.66E-01	2.83	7	5	CAB39	RAB14	ADAM10	MAPK1	MIF
GO	regulation of I-kappaB kinase/NF-kappaB signaling	0.054642005	0.344670151	4.63E-01	3.35	10	3	IKBKB	CHUK	SIRT1
GO	cell-matrix adhesion	0.055046007	0.346789846	4.60E-01	3.94	15	2	ZYX	TSC1
GO	protein tetramerization	0.055046007	0.346362238	4.60E-01	3.94	15	2	TP63	IGF1R
GO	regulation of Ras protein signal transduction	0.055046007	0.345935683	4.61E-01	3.94	15	2	ARHGDIA	RAF1
GO	negative regulation of hydrogen peroxide-induced cell death	0.057239266	0.359276724	4.45E-01	5.60	49	1	HGF
GO	regulation of fibroblast migration	0.057239266	0.358835352	4.45E-01	5.60	49	1	RFFL
GO	branching involved in blood vessel morphogenesis	0.057239266	0.358395063	4.46E-01	5.60	49	1	VEGFA
GO	cellular response to osmotic stress	0.057239266	0.357955853	4.46E-01	5.60	49	1	CAB39
GO	positive regulation of neural precursor cell proliferation	0.057239266	0.357517719	4.47E-01	5.60	49	1	VEGFA
GO	regulation of Golgi organization	0.057239266	0.357080656	4.47E-01	5.60	49	1	MAPK1
GO	DNA damage response, signal transduction resulting in transcription	0.057239266	0.35664466	4.48E-01	5.60	49	1	TP63
GO	negative regulation of cell migration involved in sprouting angiogenesis	0.057239266	0.356209727	4.48E-01	5.60	49	1	KLF4
GO	DNA modification	0.057239266	0.355775854	4.49E-01	5.60	49	1	UNG
GO	gliogenesis	0.057239266	0.355343037	4.49E-01	5.60	49	1	CDK6
GO	regulation of activin receptor signaling pathway	0.057239266	0.354911271	4.50E-01	5.60	49	1	ACVR2A
GO	establishment or maintenance of actin cytoskeleton polarity	0.057239266	0.354480554	4.50E-01	5.60	49	1	RICTOR
GO	neurotransmitter biosynthetic process	0.057239266	0.35405088	4.51E-01	5.60	49	1	SLC6A4
GO	regulation of monocyte differentiation	0.057239266	0.353622247	4.51E-01	5.60	49	1	CDK6
GO	negative regulation of hemopoiesis	0.057239266	0.353194651	4.52E-01	5.60	49	1	CDK6
GO	negative regulation of focal adhesion assembly	0.057239266	0.352768087	4.53E-01	5.60	49	1	PTEN
GO	regulation of adaptive immune response	0.057239266	0.352342553	4.53E-01	5.60	49	1	SIRT1
GO	positive regulation of mitochondrial fission	0.057239266	0.351918044	4.54E-01	5.60	49	1	KDR
GO	negative regulation of cation transmembrane transport	0.057239266	0.351494556	4.54E-01	5.60	49	1	CAB39
GO	amyloid-beta metabolic process	0.057239266	0.351072087	4.55E-01	5.60	49	1	BACE1
GO	positive regulation of blood vessel diameter	0.057239266	0.350650632	4.55E-01	5.60	49	1	BMPR2
GO	regulation of transcription from RNA polymerase II promoter in response to stress	0.058330819	0.356909074	4.47E-01	3.86	15	2	KLF2	VEGFA
GO	interleukin-1-mediated signaling pathway	0.060557791	0.370091504	4.32E-01	3.81	14	2	IKBKB	CHUK
GO	atrioventricular valve morphogenesis	0.061201626	0.373578827	4.28E-01	5.47	44	1	BMPR2
GO	myeloid cell development	0.061201626	0.373132496	4.28E-01	5.47	44	1	APP
GO	N-terminal protein amino acid acetylation	0.061201626	0.372687231	4.29E-01	5.47	44	1	KAT2B
GO	regulation of branching involved in ureteric bud morphogenesis	0.061201626	0.372243027	4.29E-01	5.47	44	1	VEGFA
GO	maintenance of protein location in nucleus	0.061201626	0.37179988	4.30E-01	5.47	44	1	ARL2
GO	negative regulation of adherens junction organization	0.061201626	0.371357788	4.30E-01	5.47	44	1	PTEN
GO	regulation of protein homooligomerization	0.061201626	0.370916745	4.31E-01	5.47	44	1	BCL2L11
GO	regulation of macrophage chemotaxis	0.061201626	0.370476749	4.31E-01	5.47	44	1	MIF
GO	positive regulation of cellular response to insulin stimulus	0.061201626	0.370037796	4.32E-01	5.47	44	1	SIRT1
GO	body fluid secretion	0.061201626	0.369599881	4.32E-01	5.47	44	1	VEGFA
GO	positive regulation of mesonephros development	0.061201626	0.369163002	4.33E-01	5.47	44	1	VEGFA
GO	response to X-ray	0.061201626	0.368727154	4.33E-01	5.47	44	1	TP63
GO	negative regulation of DNA-dependent DNA replication	0.061201626	0.368292334	4.34E-01	5.47	44	1	FBXW7
GO	positive regulation of collagen metabolic process	0.061201626	0.367858539	4.34E-01	5.47	44	1	HDAC2
GO	positive regulation of NF-kappaB import into nucleus	0.061201626	0.367425764	4.35E-01	5.47	44	1	APP
GO	positive regulation of CREB transcription factor activity	0.061201626	0.366994007	4.35E-01	5.47	44	1	VEGFA
GO	transport along microtubule	0.061201626	0.366563262	4.36E-01	5.47	44	1	APP
GO	negative regulation of RNA metabolic process	0.061201626	0.366133528	4.36E-01	5.47	44	1	NCOR2
GO	JAK-STAT cascade involved in growth hormone signaling pathway	0.061201626	0.3657048	4.37E-01	5.47	44	1	MAPK1
GO	positive regulation of collagen biosynthetic process	0.061201626	0.365277075	4.37E-01	5.47	44	1	HDAC2
GO	regulation of protein complex disassembly	0.061201626	0.36485035	4.38E-01	5.47	44	1	IGF1R
GO	regulation of centriole replication	0.061201626	0.36442462	4.38E-01	5.47	44	1	KAT2B
GO	presynapse assembly	0.061201626	0.363999883	4.39E-01	5.47	44	1	PTEN
GO	negative regulation of release of cytochrome c from mitochondria	0.061201626	0.363576135	4.39E-01	5.47	44	1	HGF
GO	positive regulation of phosphoprotein phosphatase activity	0.061201626	0.363153372	4.40E-01	5.47	44	1	MTOR
GO	cellular response to virus	0.061201626	0.362731591	4.40E-01	5.47	44	1	CHUK
GO	cellular response to corticosteroid stimulus	0.061201626	0.362310788	4.41E-01	5.47	44	1	BCL2L11
GO	regulation of cell death	0.061682167	0.36473244	4.38E-01	3.79	14	2	TSC1	AXIN2
GO	epithelial cell differentiation	0.061682167	0.364310296	4.39E-01	3.79	14	2	HDAC2	VEGFA
GO	protein oligomerization	0.063367949	0.373834269	4.27E-01	3.18	9	3	IKZF1	IGF1R	SLC6A4
GO	histone modification	0.063952304	0.376845965	4.24E-01	3.74	13	2	HDAC2	SIRT1
GO	bone morphogenesis	0.065147531	0.383446192	4.16E-01	5.34	41	1	BMPR2
GO	Notch receptor processing	0.065147531	0.383004434	4.17E-01	5.34	41	1	ADAM10
GO	positive regulation of cardiac muscle tissue growth	0.065147531	0.382563693	4.17E-01	5.34	41	1	PIM1
GO	DNA alkylation	0.065147531	0.382123964	4.18E-01	5.34	41	1	PPM1D
GO	establishment of skin barrier	0.065147531	0.381685245	4.18E-01	5.34	41	1	TP63
GO	positive regulation of dendrite morphogenesis	0.065147531	0.381247533	4.19E-01	5.34	41	1	CAPRIN1
GO	positive regulation of G2/M transition of mitotic cell cycle	0.065147531	0.380810823	4.19E-01	5.34	41	1	CCND1
GO	embryonic digit morphogenesis	0.065147531	0.380375113	4.20E-01	5.34	41	1	HDAC2
GO	regulation of protein homodimerization activity	0.065147531	0.379940399	4.20E-01	5.34	41	1	BCL2
GO	odontogenesis of dentin-containing tooth	0.065147531	0.379506677	4.21E-01	5.34	41	1	HDAC2
GO	regulation of cell cycle phase transition	0.065147531	0.379073944	4.21E-01	5.34	41	1	FBXW7
GO	regulation of stem cell proliferation	0.065147531	0.378642197	4.22E-01	5.34	41	1	YAP1
GO	positive regulation of G1/S transition of mitotic cell cycle	0.065147531	0.378211432	4.22E-01	5.34	41	1	CCND2
GO	regulation of water loss via skin	0.065147531	0.377781646	4.23E-01	5.34	41	1	TP63
GO	protein deacylation	0.065147531	0.377352836	4.23E-01	5.34	41	1	SIRT1
GO	regulation of histone H3-K4 methylation	0.065147531	0.376924999	4.24E-01	5.34	41	1	MYB
GO	regulation of bicellular tight junction assembly	0.065147531	0.37649813	4.24E-01	5.34	41	1	IKBKB
GO	protein localization to chromatin	0.065147531	0.376072227	4.25E-01	5.34	41	1	RAD21
GO	DNA methylation or demethylation	0.065147531	0.375647287	4.25E-01	5.34	41	1	PPM1D
GO	positive regulation of immune system process	0.065147531	0.375223306	4.26E-01	5.34	41	1	VEGFA
GO	mesenchyme development	0.065147531	0.37480028	4.26E-01	5.34	41	1	BMPR2
GO	dendritic spine morphogenesis	0.065147531	0.374378208	4.27E-01	5.34	41	1	PTEN
GO	positive regulation of response to endoplasmic reticulum stress	0.065147531	0.373957085	4.27E-01	5.34	41	1	BCL2L11
GO	regulation of intrinsic apoptotic signaling pathway in response to DNA damage	0.065147531	0.373536909	4.28E-01	5.34	41	1	CDKN2D
GO	intrinsic apoptotic signaling pathway	0.067409807	0.386074351	4.13E-01	3.67	13	2	BCL2L11	BCL2
GO	Ras protein signal transduction	0.067600998	0.386735306	4.13E-01	3.11	9	3	RAB14	KRAS	RAB5A
GO	regulation of collagen biosynthetic process	0.069077047	0.394737031	4.04E-01	5.23	37	1	HDAC2
GO	regulation of multicellular organism growth	0.069077047	0.394295491	4.04E-01	5.23	37	1	APP
GO	positive regulation of cholesterol transport	0.069077047	0.393854937	4.05E-01	5.23	37	1	SIRT1
GO	pharyngeal system development	0.069077047	0.393415367	4.05E-01	5.23	37	1	BMPR2
GO	positive regulation of cell cycle G2/M phase transition	0.069077047	0.392976777	4.06E-01	5.23	37	1	CCND1
GO	positive regulation of lymphocyte migration	0.069077047	0.392539163	4.06E-01	5.23	37	1	APP
GO	cellular response to gamma radiation	0.069077047	0.392102523	4.07E-01	5.23	37	1	YAP1
GO	positive regulation of natural killer cell mediated cytotoxicity	0.069077047	0.391666854	4.07E-01	5.23	37	1	CADM1
GO	positive regulation of macrophage activation	0.069077047	0.391232152	4.08E-01	5.23	37	1	APP
GO	regulation of synaptic vesicle exocytosis	0.069077047	0.390798413	4.08E-01	5.23	37	1	RAB5A
GO	RNA stabilization	0.069077047	0.390365635	4.09E-01	5.23	37	1	AXIN2
GO	neurotrophin signaling pathway	0.069077047	0.389933815	4.09E-01	5.23	37	1	BDNF
GO	negative regulation of lipid biosynthetic process	0.069077047	0.389502949	4.09E-01	5.23	37	1	FBXW7
GO	regulation of T cell migration	0.069077047	0.389073034	4.10E-01	5.23	37	1	APP
GO	histone H2A monoubiquitination	0.069077047	0.388644067	4.10E-01	5.23	37	1	PCGF5
GO	negative regulation of cell development	0.069077047	0.388216045	4.11E-01	5.23	37	1	FBXW7
GO	negative regulation of interleukin-8 production	0.069077047	0.387788964	4.11E-01	5.23	37	1	KLF4
GO	positive chemotaxis	0.069077047	0.387362823	4.12E-01	5.23	37	1	VEGFA
GO	synaptic vesicle transport	0.069077047	0.386937616	4.12E-01	5.23	37	1	RAB5A
GO	cardiac atrium morphogenesis	0.069077047	0.386513343	4.13E-01	5.23	37	1	BMPR2
GO	positive regulation of telomere capping	0.069077047	0.386089998	4.13E-01	5.23	37	1	MAPK1
GO	regulation of early endosome to late endosome transport	0.069077047	0.38566758	4.14E-01	5.23	37	1	MAPK1
GO	positive regulation of transcription of Notch receptor target	0.069077047	0.385246086	4.14E-01	5.23	37	1	KAT2B
GO	negative regulation of tumor necrosis factor-mediated signaling pathway	0.069077047	0.384825511	4.15E-01	5.23	37	1	RFFL
GO	cellular response to glucocorticoid stimulus	0.069077047	0.384405854	4.15E-01	5.23	37	1	BCL2L11
GO	positive regulation of stem cell proliferation	0.069077047	0.383987112	4.16E-01	5.23	37	1	VEGFA
GO	negative regulation of phosphoprotein phosphatase activity	0.069077047	0.38356928	4.16E-01	5.23	37	1	IKBKB
GO	positive regulation of natural killer cell mediated immunity	0.069077047	0.383152357	4.17E-01	5.23	37	1	CADM1
GO	regulation of cardiac muscle cell proliferation	0.072990241	0.404418243	3.93E-01	5.11	35	1	PIM1
GO	regulation of cholesterol efflux	0.072990241	0.403979611	3.94E-01	5.11	35	1	SIRT1
GO	regulation of amyloid-beta formation	0.072990241	0.40354193	3.94E-01	5.11	35	1	APP
GO	response to nutrient levels	0.072990241	0.403105197	3.95E-01	5.11	35	1	MTOR
GO	negative regulation of osteoclast differentiation	0.072990241	0.402669407	3.95E-01	5.11	35	1	FBXW7
GO	positive regulation of p38MAPK cascade	0.072990241	0.402234559	3.96E-01	5.11	35	1	VEGFA
GO	release of cytochrome c from mitochondria	0.072990241	0.401800649	3.96E-01	5.11	35	1	BCL2
GO	calcium-mediated signaling using intracellular calcium source	0.072990241	0.401367674	3.96E-01	5.11	35	1	KDR
GO	endoplasmic reticulum calcium ion homeostasis	0.072990241	0.400935632	3.97E-01	5.11	35	1	BCL2
GO	maintenance of protein localization in organelle	0.072990241	0.400504518	3.97E-01	5.11	35	1	ARL2
GO	negative regulation of oxidative stress-induced intrinsic apoptotic signaling pathway	0.072990241	0.400074331	3.98E-01	5.11	35	1	SIRT1
GO	regulation of mitochondrial membrane permeability	0.072990241	0.399645066	3.98E-01	5.11	35	1	BCL2
GO	DNA methylation	0.072990241	0.399216722	3.99E-01	5.11	35	1	PPM1D
GO	regulation of microtubule polymerization or depolymerization	0.072990241	0.398789295	3.99E-01	5.11	35	1	ARL2
GO	anion homeostasis	0.072990241	0.398362783	4.00E-01	5.11	35	1	SIRT1
GO	regulation of oxidative stress-induced intrinsic apoptotic signaling pathway	0.072990241	0.397937181	4.00E-01	5.11	35	1	SIRT1
GO	prostaglandin biosynthetic process	0.072990241	0.397512489	4.01E-01	5.11	35	1	MIF
GO	response to endoplasmic reticulum stress	0.073306684	0.398810243	3.99E-01	3.55	12	2	BCL2L11	BCL2
GO	negative regulation of response to external stimulus	0.07450554	0.404900715	3.93E-01	3.53	12	2	PTEN	KLF4
GO	positive regulation of chromosome organization	0.076887182	0.417399245	3.79E-01	5.01	32	1	RAD21
GO	regulation of protein kinase A signaling	0.076887182	0.416955675	3.80E-01	5.01	32	1	MIF
GO	positive regulation of excitatory postsynaptic potential	0.076887182	0.416513047	3.80E-01	5.01	32	1	PTEN
GO	regulation of long-term synaptic potentiation	0.076887182	0.416071357	3.81E-01	5.01	32	1	APP
GO	positive regulation of phospholipase activity	0.076887182	0.415630604	3.81E-01	5.01	32	1	FGFR1
GO	regulation of myotube differentiation	0.076887182	0.415190783	3.82E-01	5.01	32	1	BDNF
GO	regulation of heterotypic cell-cell adhesion	0.076887182	0.414751892	3.82E-01	5.01	32	1	KLF4
GO	endocardial cushion development	0.076887182	0.414313928	3.83E-01	5.01	32	1	BMPR2
GO	regulation of mitochondrial fission	0.076887182	0.413876888	3.83E-01	5.01	32	1	KDR
GO	nucleosome disassembly	0.076887182	0.413440769	3.84E-01	5.01	32	1	HMGA1
GO	chromatin disassembly	0.076887182	0.413005569	3.84E-01	5.01	32	1	HMGA1
GO	intracellular estrogen receptor signaling pathway	0.076887182	0.412571283	3.85E-01	5.01	32	1	ESR2
GO	extrinsic apoptotic signaling pathway in absence of ligand	0.076887182	0.41213791	3.85E-01	5.01	32	1	BCL2
GO	mitochondrial membrane organization	0.076887182	0.411705446	3.85E-01	5.01	32	1	BCL2
GO	positive regulation of interferon-alpha production	0.076887182	0.411273889	3.86E-01	5.01	32	1	CHUK
GO	regulation of catenin import into nucleus	0.076887182	0.410843236	3.86E-01	5.01	32	1	AXIN2
GO	activin receptor signaling pathway	0.076887182	0.410413483	3.87E-01	5.01	32	1	ACVR2A
GO	positive regulation of neuron apoptotic process	0.076887182	0.409984629	3.87E-01	5.01	32	1	FBXW7
GO	positive regulation of axon extension	0.076887182	0.40955667	3.88E-01	5.01	32	1	VEGFA
GO	circulatory system development	0.076922145	0.409315646	3.88E-01	3.49	11	2	KAT2B	PTEN
GO	regulation of cell motility	0.076922145	0.408889276	3.88E-01	3.49	11	2	CDK6	RAF1
GO	Wnt signaling pathway	0.076922145	0.408463793	3.89E-01	3.49	11	2	PTEN	AXIN2
GO	negative regulation of protein kinase activity	0.076922145	0.408039194	3.89E-01	3.49	11	2	DUSP10	IGF1R
GO	regulation of vacuole organization	0.080767935	0.427994573	3.69E-01	4.90	30	1	RAB5A
GO	Golgi to endosome transport	0.080767935	0.427550595	3.69E-01	4.90	30	1	RAB14
GO	regulation of endoplasmic reticulum stress-induced intrinsic apoptotic signaling pathway	0.080767935	0.427107538	3.69E-01	4.90	30	1	BCL2L11
GO	mesoderm formation	0.080767935	0.426665397	3.70E-01	4.90	30	1	BMPR2
GO	proteoglycan metabolic process	0.080767935	0.426224172	3.70E-01	4.90	30	1	BMPR2
GO	covalent chromatin modification	0.080767935	0.425783857	3.71E-01	4.90	30	1	SIRT1
GO	positive regulation of dendritic spine development	0.080767935	0.425344452	3.71E-01	4.90	30	1	CAPRIN1
GO	negative regulation of macromolecule biosynthetic process	0.080767935	0.424905952	3.72E-01	4.90	30	1	HDAC2
GO	regulation of regulatory T cell differentiation	0.080767935	0.424468356	3.72E-01	4.90	30	1	DUSP10
GO	wound healing, spreading of cells	0.080767935	0.42403166	3.73E-01	4.90	30	1	ITGA5
GO	inactivation of MAPK activity	0.080767935	0.423595862	3.73E-01	4.90	30	1	DUSP10
GO	response to progesterone	0.080767935	0.423160959	3.73E-01	4.90	30	1	YAP1
GO	eye morphogenesis	0.080767935	0.422726948	3.74E-01	4.90	30	1	VEGFA
GO	regulation of cell development	0.080767935	0.422293826	3.74E-01	4.90	30	1	YAP1
GO	dopaminergic neuron differentiation	0.080767935	0.42186159	3.75E-01	4.90	30	1	VEGFA
GO	regulation of response to cytokine stimulus	0.080767935	0.421430239	3.75E-01	4.90	30	1	KLF4
GO	growth hormone receptor signaling pathway	0.080767935	0.420999769	3.76E-01	4.90	30	1	MAPK1
GO	peptidyl-lysine modification	0.084317919	0.439055452	3.57E-01	3.36	10	2	KAT2B	SIRT1
GO	epithelium development	0.084317919	0.438607892	3.58E-01	3.36	10	2	KDR	VEGFA
GO	positive regulation of transcription from RNA polymerase II promoter involved in cellular response to chemical stimulus	0.084632568	0.439796326	3.57E-01	4.81	28	1	VEGFA
GO	positive regulation of transcription from RNA polymerase I promoter	0.084632568	0.439348924	3.57E-01	4.81	28	1	MTOR
GO	negative regulation of protein tyrosine kinase activity	0.084632568	0.438902431	3.58E-01	4.81	28	1	SOCS5
GO	positive regulation of cellular component movement	0.084632568	0.438456845	3.58E-01	4.81	28	1	VEGFA
GO	mRNA transcription	0.084632568	0.438012162	3.59E-01	4.81	28	1	HIPK3
GO	positive regulation of BMP signaling pathway	0.084632568	0.437568381	3.59E-01	4.81	28	1	BMPR2
GO	ventricular septum morphogenesis	0.084632568	0.437125498	3.59E-01	4.81	28	1	BMPR2
GO	cortical actin cytoskeleton organization	0.084632568	0.436683511	3.60E-01	4.81	28	1	IKBKB
GO	meiosis I	0.084632568	0.436242416	3.60E-01	4.81	28	1	BCL2L11
GO	cellular response to hexose stimulus	0.084632568	0.435802212	3.61E-01	4.81	28	1	IGF1R
GO	protein-DNA complex disassembly	0.084632568	0.435362895	3.61E-01	4.81	28	1	HMGA1
GO	negative regulation of ion transmembrane transporter activity	0.084632568	0.434924463	3.62E-01	4.81	28	1	CAB39
GO	positive regulation of lipid metabolic process	0.084632568	0.434486913	3.62E-01	4.81	28	1	MTOR
GO	positive regulation of receptor internalization	0.084632568	0.434050243	3.62E-01	4.81	28	1	VEGFA
GO	negative regulation of cytokine biosynthetic process	0.084632568	0.43361445	3.63E-01	4.81	28	1	KLF4
GO	regulation of macrophage activation	0.084632568	0.433179531	3.63E-01	4.81	28	1	MIF
GO	activation of MAPK activity	0.086829949	0.443981193	3.53E-01	3.31	10	2	MAP2K4	MAPK1
GO	protein localization to cell periphery	0.086829949	0.443536767	3.53E-01	3.31	10	2	IKBKB	MAP7
GO	cytosolic transport	0.088094422	0.449545835	3.47E-01	3.29	10	2	RAB14	RAB5A
GO	regulation of natural killer cell mediated cytotoxicity	0.088481145	0.451068214	3.46E-01	4.71	26	1	CADM1
GO	positive regulation of protein autophosphorylation	0.088481145	0.450618046	3.46E-01	4.71	26	1	VEGFA
GO	negative regulation of protein polymerization	0.088481145	0.450168776	3.47E-01	4.71	26	1	MAPRE1
GO	positive regulation of biosynthetic process	0.088481145	0.4497204	3.47E-01	4.71	26	1	MTOR
GO	cellular response to nerve growth factor stimulus	0.088481145	0.449272917	3.47E-01	4.71	26	1	BDNF
GO	protein homotrimerization	0.088481145	0.448826324	3.48E-01	4.71	26	1	MIF
GO	negative regulation of protein import into nucleus	0.088481145	0.448380618	3.48E-01	4.71	26	1	AXIN2
GO	early endosome to late endosome transport	0.088481145	0.447935796	3.49E-01	4.71	26	1	RAB5A
GO	outflow tract septum morphogenesis	0.088481145	0.447491855	3.49E-01	4.71	26	1	BMPR2
GO	viral genome replication	0.088481145	0.447048794	3.50E-01	4.71	26	1	RAB5A
GO	nuclear transport	0.088481145	0.446606609	3.50E-01	4.71	26	1	HMGA1
GO	peripheral nervous system development	0.088481145	0.446165298	3.51E-01	4.71	26	1	BDNF
GO	regulation of transcription from RNA polymerase III promoter	0.088481145	0.445724859	3.51E-01	4.71	26	1	MTOR
GO	negative regulation of myeloid cell differentiation	0.088481145	0.445285288	3.51E-01	4.71	26	1	CDK6
GO	positive regulation of phosphatase activity	0.088481145	0.444846583	3.52E-01	4.71	26	1	MTOR
GO	positive regulation of erythrocyte differentiation	0.088481145	0.444408742	3.52E-01	4.71	26	1	ACVR2A
GO	phosphatidylglycerol metabolic process	0.088481145	0.443971762	3.53E-01	4.71	26	1	CDS2
GO	brain development	0.089364443	0.447963409	3.49E-01	3.27	10	2	PTEN	SLC6A4
GO	positive regulation of B cell activation	0.089364443	0.447523798	3.49E-01	3.27	10	2	BCL2	MIF
GO	macromolecular complex assembly	0.090639944	0.453466306	3.43E-01	3.25	10	2	YAP1	HMGA1
GO	phospholipid dephosphorylation	0.092313733	0.461387835	3.36E-01	4.62	25	1	PTEN
GO	regulation of axon extension involved in axon guidance	0.092313733	0.46093638	3.36E-01	4.62	25	1	VEGFA
GO	cellular response to catecholamine stimulus	0.092313733	0.460485806	3.37E-01	4.62	25	1	MAPK1
GO	cellular response to ammonium ion	0.092313733	0.460036113	3.37E-01	4.62	25	1	MAPK1
GO	positive regulation of cell cycle G1/S phase transition	0.092313733	0.459587297	3.38E-01	4.62	25	1	CCND2
GO	ammonium transport	0.092313733	0.459139357	3.38E-01	4.62	25	1	SLC6A4
GO	negative regulation of signal transduction in absence of ligand	0.092313733	0.458692288	3.38E-01	4.62	25	1	BCL2
GO	microtubule polymerization or depolymerization	0.092313733	0.458246089	3.39E-01	4.62	25	1	TPPP3
GO	regulation of telomere capping	0.092313733	0.457800758	3.39E-01	4.62	25	1	MAPK1
GO	negative regulation of extrinsic apoptotic signaling pathway in absence of ligand	0.092313733	0.457356291	3.40E-01	4.62	25	1	BCL2
GO	positive regulation of protein oligomerization	0.092313733	0.456912687	3.40E-01	4.62	25	1	BCL2L11
GO	vesicle-mediated transport between endosomal compartments	0.092313733	0.456469942	3.41E-01	4.62	25	1	RAB5A
GO	regulation of androgen receptor signaling pathway	0.092313733	0.456028054	3.41E-01	4.62	25	1	SIRT1
GO	membrane assembly	0.092313733	0.455587021	3.41E-01	4.62	25	1	PTEN
GO	antigen receptor-mediated signaling pathway	0.093896589	0.462951008	3.34E-01	2.72	7	3	IKBKB	CHUK	BCL2
GO	protein deubiquitination	0.093896589	0.462504144	3.35E-01	2.72	7	3	KAT2B	PTEN	AXIN2
GO	positive regulation of programmed cell death	0.093896589	0.462058142	3.35E-01	2.72	7	3	MAPK8	BCL2L11	SIRT1
GO	tumor necrosis factor-mediated signaling pathway	0.094498659	0.464572888	3.33E-01	3.19	9	2	IKBKB	CHUK
GO	membrane protein intracellular domain proteolysis	0.096130398	0.472139962	3.26E-01	4.54	23	1	ADAM10
GO	positive regulation of immune effector process	0.096130398	0.471685982	3.26E-01	4.54	23	1	MYB
GO	response to glucocorticoid	0.096130398	0.471232873	3.27E-01	4.54	23	1	BCL2L11
GO	DNA replication initiation	0.096130398	0.470780634	3.27E-01	4.54	23	1	PURA
GO	limb development	0.096130398	0.470329263	3.28E-01	4.54	23	1	KAT2B
GO	regulation of actin filament bundle assembly	0.096130398	0.469878756	3.28E-01	4.54	23	1	TSC1
GO	camera-type eye development	0.096130398	0.469429111	3.28E-01	4.54	23	1	VEGFA
GO	intrinsic apoptotic signaling pathway in response to endoplasmic reticulum stress	0.096130398	0.468980326	3.29E-01	4.54	23	1	BCL2
GO	receptor catabolic process	0.096130398	0.468532398	3.29E-01	4.54	23	1	MYLIP
GO	mammary gland development	0.096130398	0.468085325	3.30E-01	4.54	23	1	VEGFA
GO	regulation of transmembrane transport	0.096130398	0.467639105	3.30E-01	4.54	23	1	BCL2
GO	proteoglycan biosynthetic process	0.096130398	0.467193734	3.31E-01	4.54	23	1	BMPR2
GO	negative regulation of oxidative stress-induced cell death	0.096130398	0.466749211	3.31E-01	4.54	23	1	SIRT1
GO	negative regulation of endothelial cell apoptotic process	0.096130398	0.466305533	3.31E-01	4.54	23	1	KDR
GO	regulation of cell cycle G1/S phase transition	0.096130398	0.465862698	3.32E-01	4.54	23	1	FBXW7
GO	protein modification by small protein removal	0.097233534	0.470761599	3.27E-01	2.67	6	3	KAT2B	PTEN	AXIN2
GO	G2/M transition of mitotic cell cycle	0.09840431	0.475978381	3.22E-01	3.13	9	2	WEE1	MAPRE1
GO	endocytosis	0.098920115	0.478020215	3.21E-01	2.65	6	3	APP	MAPK1	RAB5A
GO	cell cycle G2/M phase transition	0.099716319	0.4814119	3.17E-01	3.11	9	2	WEE1	MAPRE1
GO	heterotypic cell-cell adhesion	0.099931205	0.481993325	3.17E-01	4.46	22	1	ITGA5
GO	regulation of apoptotic signaling pathway	0.099931205	0.481538185	3.17E-01	4.46	22	1	BCL2
GO	regulation of potassium ion transmembrane transporter activity	0.099931205	0.481083904	3.18E-01	4.46	22	1	CAB39
GO	respiratory tube development	0.099931205	0.480630479	3.18E-01	4.46	22	1	VEGFA
GO	negative regulation of gene expression, epigenetic	0.099931205	0.480177908	3.19E-01	4.46	22	1	PPM1D
GO	negative regulation of epithelial to mesenchymal transition	0.099931205	0.479726188	3.19E-01	4.46	22	1	PTEN
GO	prostaglandin metabolic process	0.099931205	0.479275318	3.19E-01	4.46	22	1	MIF
GO	regulation of nervous system development	0.099931205	0.478825294	3.20E-01	4.46	22	1	YAP1
GO	peptidyl-tyrosine dephosphorylation	0.099931205	0.478376115	3.20E-01	4.46	22	1	DUSP10
GO	positive regulation of leukocyte mediated cytotoxicity	0.099931205	0.477927777	3.21E-01	4.46	22	1	CADM1
GO	regulation of cellular protein localization	0.099931205	0.477480279	3.21E-01	4.46	22	1	BDNF
GO	regulation of glucose metabolic process	0.099931205	0.477033618	3.21E-01	4.46	22	1	SIRT1
GO	regulation of protein import into nucleus	0.099931205	0.476587793	3.22E-01	4.46	22	1	SIRT1
GO	protein localization to plasma membrane	0.103681833	0.494013438	3.06E-01	3.05	8	2	IKBKB	MAP7
GO	internal peptidyl-lysine acetylation	0.103716219	0.493716291	3.07E-01	4.38	21	1	KAT2B
GO	positive regulation of synapse assembly	0.103716219	0.493256164	3.07E-01	4.38	21	1	BDNF
GO	regulation of NF-kappaB import into nucleus	0.103716219	0.492796894	3.07E-01	4.38	21	1	APP
GO	positive regulation of release of cytochrome c from mitochondria	0.103716219	0.492338478	3.08E-01	4.38	21	1	BCL2L11
GO	positive regulation of wound healing	0.103716219	0.491880914	3.08E-01	4.38	21	1	MTOR
GO	response to ketone	0.103716219	0.4914242	3.09E-01	4.38	21	1	YAP1
GO	regulation of supramolecular fiber organization	0.103716219	0.490968334	3.09E-01	4.38	21	1	ARL2
GO	negative regulation of cell-matrix adhesion	0.107485504	0.508339693	2.94E-01	4.30	20	1	PTEN
GO	mRNA polyadenylation	0.107485504	0.507869008	2.94E-01	4.30	20	1	APP
GO	microtubule polymerization	0.107485504	0.507399194	2.95E-01	4.30	20	1	TPPP3
GO	negative regulation of synaptic transmission	0.107485504	0.506930249	2.95E-01	4.30	20	1	PTEN
GO	extrinsic apoptotic signaling pathway via death domain receptors	0.107485504	0.506462169	2.95E-01	4.30	20	1	BCL2
GO	endocytic recycling	0.107485504	0.505994953	2.96E-01	4.30	20	1	RAB14
GO	negative regulation of microtubule polymerization or depolymerization	0.107485504	0.505528598	2.96E-01	4.30	20	1	MAPRE1
GO	cardiac muscle cell development	0.107485504	0.505063102	2.97E-01	4.30	20	1	VEGFA
GO	regulation of neurotransmitter secretion	0.107485504	0.504598463	2.97E-01	4.30	20	1	RAB5A
GO	regulation of extrinsic apoptotic signaling pathway in absence of ligand	0.107485504	0.504134677	2.97E-01	4.30	20	1	BCL2
GO	negative regulation of myeloid leukocyte differentiation	0.107485504	0.503671744	2.98E-01	4.30	20	1	CDK6
GO	negative regulation of organelle assembly	0.107485504	0.50320966	2.98E-01	4.30	20	1	KAT2B
GO	muscle fiber development	0.107485504	0.502748423	2.99E-01	4.30	20	1	VEGFA
GO	protein localization to chromosome	0.107485504	0.50228803	2.99E-01	4.30	20	1	RAD21
GO	regulation of autophagy of mitochondrion	0.107485504	0.50182848	2.99E-01	4.30	20	1	FBXW7
GO	regulation of protein localization to cell surface	0.107485504	0.501369771	3.00E-01	4.30	20	1	BDNF
GO	cellular response to glucose stimulus	0.107485504	0.500911899	3.00E-01	4.30	20	1	IGF1R
GO	RNA polyadenylation	0.111239127	0.517931809	2.86E-01	4.22	19	1	APP
GO	negative regulation of intracellular steroid hormone receptor signaling pathway	0.111239127	0.517459675	2.86E-01	4.22	19	1	SIRT1
GO	cellular response to hydrogen peroxide	0.111239127	0.5169884	2.87E-01	4.22	19	1	SIRT1
GO	regulation of NIK/NF-kappaB signaling	0.111239127	0.516517983	2.87E-01	4.22	19	1	APP
GO	negative regulation of homeostatic process	0.111239127	0.516048421	2.87E-01	4.22	19	1	BCL2
GO	regulation of lipid biosynthetic process	0.111239127	0.515579712	2.88E-01	4.22	19	1	MTOR
GO	triglyceride homeostasis	0.111239127	0.515111854	2.88E-01	4.22	19	1	SIRT1
GO	regulation of receptor internalization	0.111239127	0.514644844	2.88E-01	4.22	19	1	VEGFA
GO	chondrocyte differentiation	0.111239127	0.51417868	2.89E-01	4.22	19	1	BMPR2
GO	positive regulation of lipid biosynthetic process	0.111239127	0.51371336	2.89E-01	4.22	19	1	MTOR
GO	ventricular septum development	0.111239127	0.513248882	2.90E-01	4.22	19	1	BMPR2
GO	positive regulation of protein tyrosine kinase activity	0.111239127	0.512785242	2.90E-01	4.22	19	1	FBXW7
GO	bicellular tight junction assembly	0.111239127	0.51232244	2.90E-01	4.22	19	1	ARL2
GO	lung development	0.114977149	0.52906077	2.76E-01	4.15	18	1	VEGFA
GO	negative regulation of epithelial cell apoptotic process	0.114977149	0.528584139	2.77E-01	4.15	18	1	KDR
GO	B cell proliferation	0.114977149	0.528108365	2.77E-01	4.15	18	1	BCL2
GO	regulation of vasoconstriction	0.114977149	0.527633448	2.78E-01	4.15	18	1	BMPR2
GO	cortical cytoskeleton organization	0.114977149	0.527159384	2.78E-01	4.15	18	1	IKBKB
GO	synaptic vesicle recycling	0.114977149	0.52668617	2.78E-01	4.15	18	1	RAB5A
GO	positive regulation of myeloid cell differentiation	0.114977149	0.526213806	2.79E-01	4.15	18	1	ACVR2A
GO	negative regulation of Notch signaling pathway	0.114977149	0.525742288	2.79E-01	4.15	18	1	FBXW7
GO	positive regulation of epidermal growth factor receptor signaling pathway	0.114977149	0.525271615	2.80E-01	4.15	18	1	FBXW7
GO	semaphorin-plexin signaling pathway	0.114977149	0.524801783	2.80E-01	4.15	18	1	ARHGDIA
GO	respiratory system development	0.114977149	0.524332792	2.80E-01	4.15	18	1	VEGFA
GO	regulation of cellular biosynthetic process	0.114977149	0.523864637	2.81E-01	4.15	18	1	SIRT1
GO	neuron differentiation	0.115829164	0.527275848	2.78E-01	2.88	7	2	MAPK8	VEGFA
GO	regulation of actin cytoskeleton reorganization	0.118699637	0.539861184	2.68E-01	4.08	17	1	ARHGDIA
GO	regulation of intracellular estrogen receptor signaling pathway	0.118699637	0.539380453	2.68E-01	4.08	17	1	YAP1
GO	regulation of developmental growth	0.118699637	0.538900577	2.68E-01	4.08	17	1	APP
GO	negative regulation of stress-activated MAPK cascade	0.118699637	0.538421554	2.69E-01	4.08	17	1	DUSP10
GO	beta-catenin-TCF complex assembly	0.118699637	0.537943382	2.69E-01	4.08	17	1	AXIN2
GO	hippo signaling	0.118699637	0.537466059	2.70E-01	4.08	17	1	YAP1
GO	positive regulation of phospholipase C activity	0.118699637	0.536989582	2.70E-01	4.08	17	1	FGFR1
GO	phosphatidylinositol 3-kinase signaling	0.118699637	0.536513949	2.70E-01	4.08	17	1	IGF1R
GO	ATP-dependent chromatin remodeling	0.118699637	0.536039158	2.71E-01	4.08	17	1	HDAC2
GO	negative regulation of DNA biosynthetic process	0.118699637	0.535565206	2.71E-01	4.08	17	1	BMPR2
GO	activation of JUN kinase activity	0.118699637	0.535092092	2.72E-01	4.08	17	1	MAP2K4
GO	negative regulation of cell-cell adhesion	0.122406653	0.55131611	2.59E-01	4.01	16	1	KLF4
GO	negative regulation of blood vessel endothelial cell migration	0.122406653	0.55082994	2.59E-01	4.01	16	1	KLF4
GO	regulation of ubiquitin-protein transferase activity	0.122406653	0.550344628	2.59E-01	4.01	16	1	FBXW7
GO	positive regulation of protein dephosphorylation	0.122406653	0.549860169	2.60E-01	4.01	16	1	MTOR
GO	regulation of protein tyrosine kinase activity	0.122406653	0.549376563	2.60E-01	4.01	16	1	APP
GO	skeletal system morphogenesis	0.122406653	0.548893807	2.61E-01	4.01	16	1	FGFR1
GO	negative regulation of extrinsic apoptotic signaling pathway via death domain receptors	0.122406653	0.548411898	2.61E-01	4.01	16	1	RFFL
GO	protein destabilization	0.122406653	0.547930835	2.61E-01	4.01	16	1	SIRT1
GO	regulation of protein autophosphorylation	0.122406653	0.547450616	2.62E-01	4.01	16	1	VEGFA
GO	neuron development	0.122728268	0.548408365	2.61E-01	2.79	7	2	APP	MAPK8
GO	proteasome-mediated ubiquitin-dependent protein catabolic process	0.123730797	0.552404422	2.58E-01	2.36	5	3	FBXW7	RFFL	SIRT1
GO	positive regulation of TOR signaling	0.126098262	0.562482019	2.50E-01	3.95	15	1	RICTOR
GO	activation of adenylate cyclase activity	0.126098262	0.561990768	2.50E-01	3.95	15	1	RAF1
GO	dendrite morphogenesis	0.126098262	0.561500375	2.51E-01	3.95	15	1	PTEN
GO	cellular response to amino acid stimulus	0.126098262	0.561010837	2.51E-01	3.95	15	1	MTOR
GO	endodermal cell differentiation	0.126098262	0.560522151	2.51E-01	3.95	15	1	ITGA5
GO	regulation of glutamate receptor signaling pathway	0.126098262	0.560034316	2.52E-01	3.95	15	1	APP
GO	positive regulation of dendrite development	0.126098262	0.55954733	2.52E-01	3.95	15	1	CAPRIN1
GO	oxoacid metabolic process	0.126098262	0.55906119	2.53E-01	3.95	15	1	MIF
GO	negative regulation of fat cell differentiation	0.126098262	0.558575894	2.53E-01	3.95	15	1	SIRT1
GO	positive regulation of telomere maintenance via telomerase	0.126098262	0.558091439	2.53E-01	3.95	15	1	MAPK1
GO	positive regulation of T cell differentiation	0.126098262	0.557607825	2.54E-01	3.95	15	1	DUSP10
GO	positive regulation of transcription factor import into nucleus	0.126098262	0.557125047	2.54E-01	3.95	15	1	APP
GO	protein trimerization	0.126098262	0.556643105	2.54E-01	3.95	15	1	MIF
GO	positive regulation of telomere maintenance	0.126098262	0.556161996	2.55E-01	3.95	15	1	MAPK1
GO	microtubule bundle formation	0.126098262	0.555681718	2.55E-01	3.95	15	1	TPPP3
GO	regulation of potassium ion transmembrane transport	0.126098262	0.555202269	2.56E-01	3.95	15	1	CAB39
GO	negative regulation of receptor activity	0.126098262	0.554723646	2.56E-01	3.95	15	1	SOCS5
GO	positive regulation of tumor necrosis factor superfamily cytokine production	0.126098262	0.554245848	2.56E-01	3.95	15	1	MIF
GO	positive regulation of adenylate cyclase activity	0.129774525	0.569913428	2.44E-01	3.88	15	1	RAF1
GO	activation of MAPKK activity	0.129774525	0.56942339	2.45E-01	3.88	15	1	RAF1
GO	negative regulation of mitochondrion organization	0.129774525	0.568934195	2.45E-01	3.88	15	1	HGF
GO	regulation of autophagosome assembly	0.129774525	0.56844584	2.45E-01	3.88	15	1	RAB5A
GO	regulation of neurotransmitter receptor activity	0.129774525	0.567958322	2.46E-01	3.88	15	1	APP
GO	mRNA stabilization	0.129774525	0.567471639	2.46E-01	3.88	15	1	AXIN2
GO	positive regulation of catalytic activity	0.129774525	0.56698579	2.46E-01	3.88	15	1	MAPK8
GO	carboxylic acid metabolic process	0.129774525	0.566500773	2.47E-01	3.88	15	1	MIF
GO	cellular response to interleukin-1	0.131136422	0.571956547	2.43E-01	2.69	6	2	IKBKB	CHUK
GO	epithelial tube morphogenesis	0.133435507	0.5814871	2.35E-01	3.82	14	1	VEGFA
GO	embryonic limb morphogenesis	0.133435507	0.580990951	2.36E-01	3.82	14	1	HDAC2
GO	apoptotic mitochondrial changes	0.133435507	0.580495647	2.36E-01	3.82	14	1	BCL2
GO	positive regulation of leukocyte migration	0.133435507	0.580001188	2.37E-01	3.82	14	1	VEGFA
GO	response to amino acid	0.133435507	0.57950757	2.37E-01	3.82	14	1	MTOR
GO	positive regulation of exocytosis	0.133435507	0.579014791	2.37E-01	3.82	14	1	RAB5A
GO	anterior/posterior pattern specification	0.133435507	0.57852285	2.38E-01	3.82	14	1	BMPR2
GO	positive regulation of telomere maintenance via telomere lengthening	0.133435507	0.578031744	2.38E-01	3.82	14	1	MAPK1
GO	positive regulation of NIK/NF-kappaB signaling	0.137081271	0.593321224	2.27E-01	3.76	14	1	APP
GO	regulation of synapse assembly	0.137081271	0.59281841	2.27E-01	3.76	14	1	BDNF
GO	regulation of endothelial cell apoptotic process	0.137081271	0.592316447	2.27E-01	3.76	14	1	KDR
GO	regulation of mitochondrial membrane potential	0.137081271	0.591815333	2.28E-01	3.76	14	1	BCL2
GO	positive regulation of DNA replication	0.137081271	0.591315066	2.28E-01	3.76	14	1	IGF1R
GO	negative regulation of protein complex assembly	0.137081271	0.590815645	2.29E-01	3.76	14	1	RAF1
GO	endothelial cell migration	0.137081271	0.590317066	2.29E-01	3.76	14	1	VEGFA
GO	apical junction assembly	0.137081271	0.589819329	2.29E-01	3.76	14	1	ARL2
GO	protein acylation	0.140711877	0.604930674	2.18E-01	3.70	13	1	KAT2B
GO	organic hydroxy compound transport	0.140711877	0.604421473	2.19E-01	3.70	13	1	SLC6A4
GO	lymphocyte proliferation	0.140711877	0.603913129	2.19E-01	3.70	13	1	BCL2
GO	endoderm formation	0.140711877	0.603405639	2.19E-01	3.70	13	1	ITGA5
GO	regulation of ubiquitin protein ligase activity	0.140711877	0.602899001	2.20E-01	3.70	13	1	PTEN
GO	regulation of filopodium assembly	0.140711877	0.602393213	2.20E-01	3.70	13	1	RAB5A
GO	glutamate receptor signaling pathway	0.140711877	0.601888273	2.20E-01	3.70	13	1	APP
GO	regulation of osteoclast differentiation	0.14432739	0.616836408	2.10E-01	3.64	12	1	MTOR
GO	epithelial to mesenchymal transition	0.14432739	0.616320227	2.10E-01	3.64	12	1	HGF
GO	positive regulation of receptor activity	0.14432739	0.615804909	2.11E-01	3.64	12	1	FBXW7
GO	regulation of metal ion transport	0.14432739	0.615290452	2.11E-01	3.64	12	1	BCL2
GO	response to steroid hormone	0.14432739	0.614776854	2.11E-01	3.64	12	1	YAP1
GO	protein localization to membrane	0.145432493	0.618967481	2.08E-01	2.52	6	2	IKBKB	MAP7
GO	regulation of ossification	0.14792787	0.629063269	2.01E-01	3.58	12	1	BMPR2
GO	positive regulation of DNA repair	0.14792787	0.628539486	2.02E-01	3.58	12	1	SIRT1
GO	chemical homeostasis	0.14792787	0.628016575	2.02E-01	3.58	12	1	FBXW7
GO	T cell receptor signaling pathway	0.149783658	0.635366591	1.97E-01	2.47	6	2	IKBKB	CHUK
GO	regulation of extrinsic apoptotic signaling pathway via death domain receptors	0.151513381	0.642170084	1.92E-01	3.53	12	1	RFFL
GO	regulation of proteasomal protein catabolic process	0.151513381	0.641637163	1.93E-01	3.53	12	1	FBXW7
GO	regulation of plasma membrane bounded cell projection assembly	0.151513381	0.641105125	1.93E-01	3.53	12	1	RAB5A
GO	ERBB2 signaling pathway	0.151513381	0.640573969	1.93E-01	3.53	12	1	KRAS
GO	negative regulation of transport	0.155083982	0.655127118	1.84E-01	3.47	11	1	PTEN
GO	negative regulation of cytokine-mediated signaling pathway	0.155083982	0.654585243	1.84E-01	3.47	11	1	RFFL
GO	negative regulation of epidermal growth factor receptor signaling pathway	0.155083982	0.654044264	1.84E-01	3.47	11	1	SOCS5
GO	regulation of protein dephosphorylation	0.155083982	0.653504178	1.85E-01	3.47	11	1	TSC1
GO	sensory organ development	0.155083982	0.652964983	1.85E-01	3.47	11	1	HIPK1
GO	JAK-STAT cascade	0.155083982	0.652426677	1.85E-01	3.47	11	1	MAPK1
GO	cellular protein localization	0.158540203	0.666417344	1.76E-01	2.01	4	3	RAB14	AXIN2	RAB5A
GO	mesenchymal cell differentiation	0.158639735	0.666286889	1.76E-01	3.42	11	1	HGF
GO	negative regulation of STAT cascade	0.158639735	0.665738955	1.77E-01	3.42	11	1	SOCS5
GO	positive regulation of receptor-mediated endocytosis	0.158639735	0.665191922	1.77E-01	3.42	11	1	VEGFA
GO	cellular response to radiation	0.162180702	0.679481218	1.68E-01	3.37	10	1	SIRT1
GO	protein ubiquitination	0.163615016	0.68492816	1.64E-01	1.77	3	4	MYLIP	FBXW7	BCL2	SIRT1
GO	eye development	0.165706943	0.693116829	1.59E-01	3.32	10	1	HIPK1
GO	histone H3 acetylation	0.165706943	0.692549166	1.60E-01	3.32	10	1	KAT2B
GO	negative regulation of DNA metabolic process	0.165706943	0.691982432	1.60E-01	3.32	10	1	BMPR2
GO	response to hydrogen peroxide	0.165706943	0.691416625	1.60E-01	3.32	10	1	SIRT1
GO	branching morphogenesis of an epithelial tube	0.165706943	0.690851742	1.61E-01	3.32	10	1	VEGFA
GO	adherens junction organization	0.169218519	0.704916002	1.52E-01	3.27	10	1	CADM1
GO	regulation of steroid biosynthetic process	0.169218519	0.70434103	1.52E-01	3.27	10	1	SIRT1
GO	regulation of dendrite morphogenesis	0.169218519	0.703766995	1.53E-01	3.27	10	1	CAPRIN1
GO	myeloid cell differentiation	0.169218519	0.703193894	1.53E-01	3.27	10	1	IKZF1
GO	protein polymerization	0.172715489	0.717141695	1.44E-01	3.22	9	1	TPPP3
GO	ubiquitin-dependent protein catabolic process	0.172823933	0.717008561	1.44E-01	1.88	4	3	MYLIP	RFFL	SIRT1
GO	interleukin-12-mediated signaling pathway	0.176197915	0.73041264	1.36E-01	3.17	9	1	MIF
GO	cellular response to interleukin-12	0.176197915	0.729819772	1.37E-01	3.17	9	1	MIF
GO	response to glucose	0.179665855	0.743580582	1.29E-01	3.12	9	1	IGF1R
GO	negative regulation of I-kappaB kinase/NF-kappaB signaling	0.179665855	0.742978004	1.29E-01	3.12	9	1	SIRT1
GO	polyol metabolic process	0.179665855	0.742376403	1.29E-01	3.12	9	1	PTEN
GO	negative regulation of cellular biosynthetic process	0.179665855	0.741775775	1.30E-01	3.12	9	1	FBXW7
GO	heterophilic cell-cell adhesion via plasma membrane cell adhesion molecules	0.179665855	0.741176118	1.30E-01	3.12	9	1	CADM1
GO	inositol phosphate metabolic process	0.179665855	0.740577429	1.30E-01	3.12	9	1	PTEN
GO	positive regulation of tumor necrosis factor production	0.179665855	0.739979707	1.31E-01	3.12	9	1	MIF
GO	regulation of organelle assembly	0.179665855	0.73938295	1.31E-01	3.12	9	1	RAB5A
GO	negative regulation of JAK-STAT cascade	0.179665855	0.738787153	1.31E-01	3.12	9	1	SOCS5
GO	regulation of mitotic cell cycle phase transition	0.180907271	0.743292917	1.29E-01	2.15	4	2	CDK6	MAPRE1
GO	protein K48-linked ubiquitination	0.183119369	0.75177646	1.24E-01	3.07	8	1	RFFL
GO	regulation of mitochondrion organization	0.183119369	0.751172139	1.24E-01	3.07	8	1	FBXW7
GO	regulation of megakaryocyte differentiation	0.186558517	0.764665149	1.17E-01	3.03	8	1	KAT2B
GO	protein heterooligomerization	0.186558517	0.764051453	1.17E-01	3.03	8	1	IKZF1
GO	positive regulation of response to DNA damage stimulus	0.186558517	0.763438742	1.17E-01	3.03	8	1	SIRT1
GO	regulation of GTPase activity	0.186946222	0.764412316	1.17E-01	2.09	4	2	ARL2	CPEB2
GO	protein complex assembly	0.18846055	0.76998734	1.14E-01	2.07	4	2	AXIN2	SLC6A4
GO	protein homooligomerization	0.189976632	0.775560603	1.10E-01	2.06	4	2	MIF	TP63
GO	heart morphogenesis	0.189983357	0.774968082	1.11E-01	2.98	8	1	VEGFA
GO	neurogenesis	0.189983357	0.774349098	1.11E-01	2.98	8	1	CDK6
GO	receptor internalization	0.189983357	0.773731102	1.11E-01	2.98	8	1	RAB5A
GO	positive regulation of JUN kinase activity	0.189983357	0.773114091	1.12E-01	2.98	8	1	MAP2K4
GO	regulation of telomere maintenance via telomerase	0.193393948	0.786365991	1.04E-01	2.94	8	1	MAPK1
GO	regulation of exocytosis	0.193393948	0.785739903	1.05E-01	2.94	8	1	RAB5A
GO	response to organonitrogen compound	0.193393948	0.785114812	1.05E-01	2.94	8	1	MTOR
GO	positive regulation of developmental growth	0.193393948	0.784490714	1.05E-01	2.94	8	1	BDNF
GO	positive regulation of proteolysis	0.19679035	0.797633959	9.82E-02	2.90	7	1	HDAC2
GO	plasma membrane bounded cell projection morphogenesis	0.19679035	0.797000916	9.85E-02	2.90	7	1	BDNF
GO	positive regulation of nervous system development	0.19679035	0.796368878	9.89E-02	2.90	7	1	BDNF
GO	regulation of DNA binding	0.19679035	0.795737841	9.92E-02	2.90	7	1	MAPK8
GO	triglyceride metabolic process	0.19679035	0.795107803	9.96E-02	2.90	7	1	SIRT1
GO	regulation of calcium ion transport	0.19679035	0.794478762	9.99E-02	2.90	7	1	BCL2
GO	positive regulation of secretion by cell	0.19679035	0.793850715	1.00E-01	2.90	7	1	RAB5A
GO	negative regulation of cellular response to transforming growth factor beta stimulus	0.200172619	0.806856932	9.32E-02	2.85	7	1	SIRT1
GO	regulation of calcium ion-dependent exocytosis	0.200172619	0.806220108	9.35E-02	2.85	7	1	RAB5A
GO	embryonic organ development	0.200172619	0.805584287	9.39E-02	2.85	7	1	KDR
GO	negative regulation of supramolecular fiber organization	0.203540815	0.818493916	8.70E-02	2.81	7	1	MAPRE1
GO	negative regulation of cellular component organization	0.203540815	0.817849433	8.73E-02	2.81	7	1	RAF1
GO	positive regulation of cysteine-type endopeptidase activity	0.206894995	0.830672825	8.06E-02	2.77	7	1	SIRT1
GO	negative regulation of transforming growth factor beta receptor signaling pathway	0.206894995	0.83001978	8.09E-02	2.77	7	1	SIRT1
GO	DNA recombination	0.206894995	0.829367762	8.13E-02	2.77	7	1	RAD21
GO	regulation of BMP signaling pathway	0.210235217	0.842096007	7.46E-02	2.73	7	1	BMPR2
GO	IRE1-mediated unfolded protein response	0.213561538	0.85474865	6.82E-02	2.69	6	1	HDGF
GO	positive regulation of cell death	0.213561538	0.854078784	6.85E-02	2.69	6	1	AXIN2
GO	epidermal growth factor receptor signaling pathway	0.213561538	0.853409968	6.88E-02	2.69	6	1	KRAS
GO	protein homotetramerization	0.213561538	0.852742198	6.92E-02	2.69	6	1	TP63
GO	response to retinoic acid	0.213561538	0.852075472	6.95E-02	2.69	6	1	CDKN2D
GO	sterol homeostasis	0.216874015	0.864615704	6.32E-02	2.65	6	1	SIRT1
GO	post-Golgi vesicle-mediated transport	0.216874015	0.86394075	6.35E-02	2.65	6	1	RAB14
GO	regulation of epidermal growth factor receptor signaling pathway	0.216874015	0.863266849	6.39E-02	2.65	6	1	APP
GO	cholesterol homeostasis	0.216874015	0.862593999	6.42E-02	2.65	6	1	SIRT1
GO	renal system development	0.220172706	0.87503218	5.80E-02	2.61	6	1	VEGFA
GO	regulation of stress fiber assembly	0.223457667	0.887396477	5.19E-02	2.57	6	1	TSC1
GO	muscle organ development	0.223457667	0.886706433	5.22E-02	2.57	6	1	SOX6
GO	actin cytoskeleton reorganization	0.226728953	0.898988228	4.62E-02	2.53	6	1	RICTOR
GO	regulation of DNA replication	0.226728953	0.898290256	4.66E-02	2.53	6	1	IGF1R
GO	regulation of cellular ketone metabolic process	0.226728953	0.897593367	4.69E-02	2.53	6	1	SIRT1
GO	regulation of tumor necrosis factor production	0.226728953	0.896897558	4.73E-02	2.53	6	1	MIF
GO	negative regulation of peptidase activity	0.229986623	0.90907958	4.14E-02	2.50	6	1	RECK
GO	cellular protein catabolic process	0.229986623	0.908375958	4.17E-02	2.50	6	1	MYLIP
GO	regulation of translational initiation	0.229986623	0.907673424	4.21E-02	2.50	6	1	RPS6KB1
GO	central nervous system development	0.231431719	0.912670835	3.97E-02	1.68	3	2	PTEN	FGFR1
GO	kidney development	0.233230731	0.919055152	3.67E-02	2.46	6	1	VEGFA
GO	regulation of proteolysis	0.233230731	0.918346004	3.70E-02	2.46	6	1	HDAC2
GO	protein modification by small protein conjugation	0.234222377	0.921539546	3.55E-02	1.38	3	3	MYLIP	FBXW7	SIRT1
GO	positive regulation of cytokine production	0.236082839	0.928143857	3.24E-02	1.64	3	2	CADM1	MIF
GO	homophilic cell adhesion via plasma membrane adhesion molecules	0.236461334	0.928916233	3.20E-02	2.42	5	1	CADM1
GO	positive regulation of protein modification by small protein conjugation or removal	0.239678487	0.940830244	2.65E-02	2.39	5	1	FBXW7
GO	regulation of JAK-STAT cascade	0.239678487	0.940107084	2.68E-02	2.39	5	1	SOCS5
GO	regulation of cell division	0.239678487	0.939385036	2.72E-02	2.39	5	1	TP63
GO	negative regulation of blood vessel morphogenesis	0.239678487	0.938664096	2.75E-02	2.39	5	1	KLF4
GO	cellular response to light stimulus	0.242882244	0.950481667	2.21E-02	2.35	5	1	TP63
GO	epidermal cell differentiation	0.246072663	0.962228964	1.67E-02	2.32	5	1	HDAC2
GO	negative regulation of protein serine/threonine kinase activity	0.246072663	0.961492188	1.71E-02	2.32	5	1	SIRT1
GO	insulin receptor signaling pathway	0.246072663	0.96075654	1.74E-02	2.32	5	1	IGF1R
GO	vesicle-mediated transport	0.247648226	0.966168881	1.49E-02	1.28	2	3	APP	RAB14	RAB5A
GO	regulation of endopeptidase activity	0.249249796	0.971674339	1.25E-02	2.28	5	1	RECK
GO	endosomal transport	0.250066426	0.974113721	1.14E-02	1.53	3	2	RAB14	RAB5A
GO	regulation of nucleic acid-templated transcription	0.251282067	0.978102508	9.62E-03	1.12	2	4	MYB	HMGA1	SOX6	ESR2
GO	snRNA transcription	0.255564428	0.994013166	2.61E-03	2.21	5	1	CCNT2
GO	snRNA transcription from RNA polymerase II promoter	0.255564428	0.993256111	2.94E-03	2.21	5	1	CCNT2
GO	calcium-mediated signaling	0.255564428	0.992500208	3.27E-03	2.21	5	1	KDR
GO	positive regulation of proteasomal ubiquitin-dependent protein catabolic process	0.255564428	0.991745455	3.60E-03	2.21	5	1	SOCS5
GO	protein ubiquitination involved in ubiquitin-dependent protein catabolic process	0.255564428	0.990991849	3.93E-03	2.21	5	1	MYLIP
GO	regulation of cation channel activity	0.258702034	1	0.00E+00	2.18	5	1	APP
GO	regulation of cell communication	0.258702034	1	0.00E+00	2.18	5	1	BDNF
GO	histone acetylation	0.258702034	1	0.00E+00	2.18	5	1	KAT2B
GO	response to metal ion	0.261826573	1	0.00E+00	2.15	4	1	BCL2
GO	regulation of phosphatase activity	0.261826573	1	0.00E+00	2.15	4	1	TSC1
GO	cell-cell junction organization	0.261826573	1	0.00E+00	2.15	4	1	CADM1
GO	glycoprotein biosynthetic process	0.261826573	1	0.00E+00	2.15	4	1	BMPR2
GO	SCF-dependent proteasomal ubiquitin-dependent protein catabolic process	0.261826573	1	0.00E+00	2.15	4	1	FBXW7
GO	regulation of fat cell differentiation	0.261826573	1	0.00E+00	2.15	4	1	SIRT1
GO	negative regulation of cell cycle	0.261826573	1	0.00E+00	2.15	4	1	CDK6
GO	proteasomal protein catabolic process	0.262520363	1	0.00E+00	1.43	3	2	RFFL	SIRT1
GO	B cell activation	0.264938098	1	0.00E+00	2.12	4	1	BCL2
GO	lymphocyte differentiation	0.264938098	1	0.00E+00	2.12	4	1	IKZF1
GO	regulation of peptide hormone secretion	0.264938098	1	0.00E+00	2.12	4	1	ARL2
GO	glucose homeostasis	0.268036663	1	0.00E+00	2.08	4	1	SIRT1
GO	mRNA 3'-end processing	0.268036663	1	0.00E+00	2.08	4	1	APP
GO	regulation of G-protein coupled receptor protein signaling pathway	0.268036663	1	0.00E+00	2.08	4	1	RGS5
GO	nitrogen compound transport	0.268036663	1	0.00E+00	2.08	4	1	SLC6A4
GO	C-terminal protein lipidation	0.271122322	1	0.00E+00	2.05	4	1	RECK
GO	positive regulation of JNK cascade	0.274195126	1	0.00E+00	2.02	4	1	APP
GO	negative regulation of transmembrane receptor protein serine/threonine kinase signaling pathway	0.27725513	1	0.00E+00	1.99	4	1	SIRT1
GO	regulation of transcription from RNA polymerase II promoter in response to hypoxia	0.280302386	1	0.00E+00	1.96	4	1	VEGFA
GO	extracellular matrix disassembly	0.280302386	1	0.00E+00	1.96	4	1	ADAM10
GO	negative regulation of inflammatory response	0.280302386	1	0.00E+00	1.96	4	1	KLF4
GO	nucleosome organization	0.283336946	1	0.00E+00	1.93	4	1	HMGA1
GO	cell-cell junction assembly	0.283336946	1	0.00E+00	1.93	4	1	ARL2
GO	regulation of transforming growth factor beta receptor signaling pathway	0.283336946	1	0.00E+00	1.93	4	1	SIRT1
GO	inflammatory response	0.285879654	1	0.00E+00	1.24	2	2	IKBKB	CHUK
GO	NIK/NF-kappaB signaling	0.286358863	1	0.00E+00	1.90	4	1	CHUK
GO	negative regulation of defense response	0.286358863	1	0.00E+00	1.90	4	1	KLF4
GO	positive regulation of binding	0.289368188	1	0.00E+00	1.87	4	1	APP
GO	positive regulation of protein targeting to mitochondrion	0.289368188	1	0.00E+00	1.87	4	1	FBXW7
GO	epidermis development	0.289368188	1	0.00E+00	1.87	4	1	HDAC2
GO	DNA damage response, signal transduction by p53 class mediator	0.292364974	1	0.00E+00	1.84	4	1	TP63
GO	C-terminal protein amino acid modification	0.292364974	1	0.00E+00	1.84	4	1	RECK
GO	positive regulation of ubiquitin protein ligase activity	0.292364974	1	0.00E+00	1.84	4	1	PTEN
GO	negative regulation of binding	0.292364974	1	0.00E+00	1.84	4	1	MAPK8
GO	negative regulation of endopeptidase activity	0.295349272	1	0.00E+00	1.81	3	1	RECK
GO	positive regulation of homeostatic process	0.295349272	1	0.00E+00	1.81	3	1	ACVR2A
GO	activation of GTPase activity	0.298321134	1	0.00E+00	1.78	3	1	TSC1
GO	cellular response to molecule of bacterial origin	0.298321134	1	0.00E+00	1.78	3	1	MAPK8
GO	organic substance transport	0.307162611	1	0.00E+00	1.69	3	1	SLC6A4
GO	regulation of proteasomal ubiquitin-dependent protein catabolic process	0.310085237	1	0.00E+00	1.66	3	1	SOCS5
GO	regulation of protein targeting to mitochondrion	0.310085237	1	0.00E+00	1.66	3	1	FBXW7
GO	cellular response to lipopolysaccharide	0.31878022	1	0.00E+00	1.58	3	1	MAPK8
GO	cellular transition metal ion homeostasis	0.324516629	1	0.00E+00	1.53	3	1	APP
GO	axon development	0.327366909	1	0.00E+00	1.50	3	1	APP
GO	skin development	0.327366909	1	0.00E+00	1.50	3	1	TP63
GO	transcription elongation from RNA polymerase II promoter	0.330205304	1	0.00E+00	1.47	3	1	CCNT2
GO	cellular protein metabolic process	0.33230056	1	0.00E+00	0.70	2	3	BACE1	APP	ADAM10
GO	ciliary basal body-plasma membrane docking	0.333031863	1	0.00E+00	1.45	3	1	MAPRE1
GO	protein localization to nucleus	0.333031863	1	0.00E+00	1.45	3	1	ARL2
GO	mRNA metabolic process	0.335846635	1	0.00E+00	1.42	3	1	HIPK3
GO	cell morphogenesis involved in neuron differentiation	0.335846635	1	0.00E+00	1.42	3	1	APP
GO	positive regulation of neuron projection development	0.335846635	1	0.00E+00	1.42	3	1	ARHGDIA
GO	cellular response to organonitrogen compound	0.335846635	1	0.00E+00	1.42	3	1	MTOR
GO	regulation of insulin secretion	0.33864967	1	0.00E+00	1.40	3	1	ARL2
GO	positive regulation of neuron differentiation	0.33864967	1	0.00E+00	1.40	3	1	FGFR1
GO	small GTPase mediated signal transduction	0.341441014	1	0.00E+00	1.37	3	1	KRAS
GO	chemical synaptic transmission	0.343063811	1	0.00E+00	0.82	2	2	PTEN	MAPK1
GO	regulation of lipid metabolic process	0.344220717	1	0.00E+00	1.34	3	1	NCOR2
GO	regulation of protein ubiquitination	0.346988825	1	0.00E+00	1.32	2	1	FBXW7
GO	B cell receptor signaling pathway	0.355224067	1	0.00E+00	1.24	2	1	BCL2
GO	peptide metabolic process	0.355224067	1	0.00E+00	1.24	2	1	BACE1
GO	regulation of protein secretion	0.363356672	1	0.00E+00	1.17	2	1	ARL2
GO	positive regulation of cell cycle process	0.363356672	1	0.00E+00	1.17	2	1	RAD21
GO	nucleotide-excision repair	0.366044952	1	0.00E+00	1.15	2	1	SIRT1
GO	DNA-templated transcription, elongation	0.366044952	1	0.00E+00	1.15	2	1	CCNT2
GO	positive regulation of cysteine-type endopeptidase activity involved in apoptotic process	0.368722015	1	0.00E+00	1.12	2	1	SIRT1
GO	regulation of Wnt signaling pathway	0.368722015	1	0.00E+00	1.12	2	1	APP
GO	viral transcription	0.379319018	1	0.00E+00	1.03	2	1	CCNT2
GO	regulation of organelle organization	0.379319018	1	0.00E+00	1.03	2	1	MAPK1
GO	positive regulation of canonical Wnt signaling pathway	0.379319018	1	0.00E+00	1.03	2	1	AXIN2
GO	plasma membrane bounded cell projection organization	0.392318385	1	0.00E+00	0.92	2	1	APP
GO	RNA export from nucleus	0.394885791	1	0.00E+00	0.89	2	1	TSC1
GO	DNA replication	0.397442478	1	0.00E+00	0.87	2	1	SIRT1
GO	protein transport	0.398802268	1	0.00E+00	0.43	1	2	RAB14	RAB5A
GO	cellular calcium ion homeostasis	0.40504867	1	0.00E+00	0.81	2	1	BCL2
GO	protein lipidation	0.415042862	1	0.00E+00	0.72	2	1	RECK
GO	regulation of mRNA stability	0.417515377	1	0.00E+00	0.70	2	1	AXIN2
GO	intracellular protein transport	0.429490222	1	0.00E+00	0.21	1	2	RAB14	RAB5A
GO	Fc-gamma receptor signaling pathway involved in phagocytosis	0.4297239	1	0.00E+00	0.60	2	1	MAPK1
GO	Fc-gamma receptor signaling pathway	0.432135089	1	0.00E+00	0.58	1	1	MAPK1
GO	Fc receptor mediated stimulatory signaling pathway	0.434536205	1	0.00E+00	0.56	1	1	MAPK1
GO	mitochondrial transport	0.434536205	1	0.00E+00	0.56	1	1	BCL2
GO	regulation of primary metabolic process	0.444040756	1	0.00E+00	0.48	1	1	NCOR2
GO	response to lipid	0.446392122	1	0.00E+00	0.46	1	1	CDKN2D
GO	regulation of small GTPase mediated signal transduction	0.446392122	1	0.00E+00	0.46	1	1	ARHGDIA
GO	positive regulation of Wnt signaling pathway	0.446392122	1	0.00E+00	0.46	1	1	AXIN2
GO	double-strand break repair	0.448733661	1	0.00E+00	0.44	1	1	RAD21
GO	modification-dependent protein catabolic process	0.448733661	1	0.00E+00	0.44	1	1	RFFL
GO	cell-cell adhesion via plasma-membrane adhesion molecules	0.451065414	1	0.00E+00	0.42	1	1	CADM1
GO	cellular protein complex assembly	0.455699721	1	0.00E+00	0.38	1	1	ARL2
GO	skeletal system development	0.460295366	1	0.00E+00	0.34	1	1	FGFR1
GO	regulation of protein kinase activity	0.46257879	1	0.00E+00	0.32	1	1	SIRT1
GO	negative regulation of canonical Wnt signaling pathway	0.464852667	1	0.00E+00	0.30	1	1	AXIN2
GO	positive regulation of intracellular protein transport	0.473853499	1	0.00E+00	0.23	1	1	FBXW7
GO	response to lipopolysaccharide	0.480505801	1	0.00E+00	0.17	1	1	MAPK8
GO	regulation of inflammatory response	0.504194209	1	0.00E+00	-0.03	1	1	KLF4
GO	mitochondrion organization	0.506294017	1	0.00E+00	-0.04	1	1	AKT3
GO	positive regulation of hydrolase activity	0.516661967	1	0.00E+00	-0.13	1	1	MAPK8
GO	negative regulation of Wnt signaling pathway	0.520748643	1	0.00E+00	-0.16	1	1	AXIN2
GO	cellular response to lipid	0.528819842	1	0.00E+00	-0.23	1	1	MAPK8
GO	negative regulation of protein phosphorylation	0.528819842	1	0.00E+00	-0.23	1	1	PTEN
GO	positive regulation of GTPase activity	0.556025535	1	0.00E+00	-0.46	1	1	TSC1
GO	regulation of canonical Wnt signaling pathway	0.593949378	1	0.00E+00	-0.78	1	1	AXIN2
GO	ion transmembrane transport	0.604184103	1	0.00E+00	-0.87	1	1	RAF1
GO	ribosome biogenesis	0.615802794	1	0.00E+00	-0.97	1	1	TSC1
GO	anterograde trans-synaptic signaling	0.638038507	1	0.00E+00	-1.17	0	1	MAPK1
GO	cilium assembly	0.705048462	1	0.00E+00	-1.79	0	1	MAPRE1
GO	ion transport	0.706305352	1	0.00E+00	-1.80	0	1	RAF1
GO	proteolysis	0.708803276	1	0.00E+00	-1.83	0	1	BACE1
GO	cellular macromolecule biosynthetic process	0.789649469	1	0.00E+00	-2.71	0	1	SIRT1
GO	transmembrane transport	0.799342582	1	0.00E+00	-2.83	0	1	RAF1

## Sheet: KEGG
	Term	P-value	Adj. P-value	neg.log10.padj	log2(c. score)	C. Score	n Genes	Genes
KEGG	PI3K-Akt signaling pathway	1.00E-22	3.09E-20	1.95E+01	9.68	818	24	CHUK	BDNF	HGF	PTEN	TSC1	MTOR	IGF1R	VEGFA	IKBKB	CCND3	CCND2	BCL2L11	CDK6	CCND1	RPS6KB1	AKT3	MYB	KDR	BCL2	MAPK1	KRAS	ITGA5	RAF1	FGFR1
KEGG	Pathways in cancer	1.26E-18	1.94E-16	1.57E+01	8.80	444	24	HDAC2	CHUK	HGF	PTEN	AXIN2	ESR2	MTOR	IGF1R	VEGFA	IKBKB	CCND3	MAPK8	CCND2	BCL2L11	CDK6	CCND1	RPS6KB1	AKT3	PIM1	BCL2	MAPK1	KRAS	RAF1	FGFR1
KEGG	FoxO signaling pathway	8.75E-18	8.98E-16	1.50E+01	10.05	1063	15	CDKN2D	CHUK	PTEN	SIRT1	KLF2	IGF1R	IKBKB	MAPK8	CCND2	BCL2L11	CCND1	AKT3	MAPK1	KRAS	RAF1
KEGG	Pancreatic cancer	2.81E-16	2.16E-14	1.37E+01	10.41	1364	12	IKBKB	MAPK8	CDK6	CCND1	CHUK	RPS6KB1	AKT3	MAPK1	KRAS	RAF1	MTOR	VEGFA
KEGG	MicroRNAs in cancer	3.26E-16	2.01E-14	1.37E+01	9.00	511	18	BMPR2	PTEN	SIRT1	MTOR	VEGFA	IKBKB	CCND2	BCL2L11	CDK6	CCND1	PIM1	BCL2	MAPK1	KRAS	ITGA5	RAF1	RECK	TP63
KEGG	Human papillomavirus infection	1.84E-15	9.42E-14	1.30E+01	8.78	441	18	HDAC2	CHUK	PTEN	TSC1	AXIN2	MTOR	VEGFA	IKBKB	CCND3	CCND2	CDK6	CCND1	RPS6KB1	AKT3	MAPK1	KRAS	ITGA5	RAF1
KEGG	Focal adhesion	4.42E-15	1.94E-13	1.27E+01	9.21	593	15	HGF	PTEN	IGF1R	VEGFA	CCND3	MAPK8	CCND2	CCND1	AKT3	KDR	BCL2	ZYX	MAPK1	ITGA5	RAF1
KEGG	Cellular senescence	4.83E-15	1.86E-13	1.27E+01	9.42	687	14	PTEN	TSC1	HIPK1	SIRT1	HIPK3	MTOR	CCND3	CCND2	CDK6	CCND1	AKT3	MAPK1	KRAS	RAF1
KEGG	Prostate cancer	7.11E-15	2.43E-13	1.26E+01	9.91	960	12	IKBKB	CCND1	CHUK	AKT3	PTEN	BCL2	MAPK1	KRAS	RAF1	MTOR	IGF1R	FGFR1
KEGG	Breast cancer	4.26E-14	1.31E-12	1.19E+01	9.34	648	13	PTEN	AXIN2	ESR2	MTOR	IGF1R	CDK6	CCND1	RPS6KB1	AKT3	MAPK1	KRAS	RAF1	FGFR1
KEGG	mTOR signaling pathway	6.60E-14	1.85E-12	1.17E+01	9.27	618	13	CHUK	CAB39	PTEN	TSC1	MTOR	IGF1R	IKBKB	RPS6KB1	AKT3	MAPK1	RICTOR	KRAS	RAF1
KEGG	Colorectal cancer	6.90E-14	1.77E-12	1.18E+01	9.85	923	11	MAPK8	BCL2L11	CCND1	RPS6KB1	AKT3	BCL2	MAPK1	KRAS	AXIN2	RAF1	MTOR
KEGG	Acute myeloid leukemia	1.71E-13	4.06E-12	1.14E+01	10.05	1060	10	IKBKB	CCND1	CHUK	RPS6KB1	AKT3	PIM1	MAPK1	KRAS	RAF1	MTOR
KEGG	Melanoma	4.26E-13	9.38E-12	1.10E+01	9.88	942	10	CDK6	CCND1	HGF	AKT3	PTEN	MAPK1	KRAS	RAF1	IGF1R	FGFR1
KEGG	Ras signaling pathway	8.34E-13	1.71E-11	1.08E+01	8.64	400	14	CHUK	BDNF	HGF	IGF1R	VEGFA	IKBKB	MAPK8	AKT3	KDR	MAPK1	KRAS	RAF1	RAB5A	FGFR1
KEGG	MAPK signaling pathway	1.42E-12	2.73E-11	1.06E+01	8.37	330	15	MAP2K4	CHUK	BDNF	HGF	IGF1R	VEGFA	IKBKB	MAPK8	DUSP10	AKT3	KDR	MAPK1	KRAS	RAF1	FGFR1
KEGG	Epstein-Barr virus infection	2.42E-12	4.38E-11	1.04E+01	8.69	412	13	MAP2K4	HDAC2	CHUK	IKBKB	NCOR2	CCND3	MAPK8	CCND2	BCL2L11	CDK6	CCND1	AKT3	BCL2
KEGG	Proteoglycans in cancer	2.42E-12	4.14E-11	1.04E+01	8.69	412	13	HGF	MTOR	IGF1R	VEGFA	CCND1	RPS6KB1	AKT3	KDR	MAPK1	KRAS	ITGA5	RAF1	FGFR1
KEGG	Hepatocellular carcinoma	5.56E-12	9.01E-11	1.00E+01	8.78	441	12	CDK6	CCND1	RPS6KB1	HGF	AKT3	PTEN	MAPK1	KRAS	AXIN2	RAF1	MTOR	IGF1R
KEGG	Autophagy	5.96E-12	9.18E-11	1.00E+01	9.05	529	11	MAPK8	RPS6KB1	AKT3	PTEN	BCL2	MAPK1	TSC1	KRAS	RAF1	MTOR	IGF1R
KEGG	Prolactin signaling pathway	1.38E-11	2.03E-10	9.69E+00	9.58	765	9	MAPK8	CCND2	CCND1	AKT3	MAPK1	KRAS	RAF1	ESR2	SOCS5
KEGG	Fluid shear stress and atherosclerosis	1.48E-11	2.07E-10	9.69E+00	8.88	470	11	IKBKB	MAP2K4	MAPK8	BMPR2	CHUK	AKT3	KDR	BCL2	ACVR2A	KLF2	VEGFA
KEGG	Signaling pathways regulating pluripotency of stem cells	1.48E-11	1.98E-10	9.70E+00	8.88	470	11	BMPR2	PCGF5	AKT3	MAPK1	KRAS	AXIN2	RAF1	KLF4	ACVR2A	IGF1R	FGFR1
KEGG	Kaposi sarcoma-associated herpesvirus infection	1.85E-11	2.37E-10	9.63E+00	8.57	380	12	IKBKB	MAP2K4	MAPK8	CDK6	CCND1	CHUK	AKT3	MAPK1	KRAS	RAF1	MTOR	VEGFA
KEGG	Glioma	2.63E-11	3.23E-10	9.49E+00	9.44	696	9	CDK6	CCND1	AKT3	PTEN	MAPK1	KRAS	RAF1	MTOR	IGF1R
KEGG	Chronic myeloid leukemia	2.97E-11	3.52E-10	9.45E+00	9.42	683	9	IKBKB	HDAC2	CDK6	CCND1	CHUK	AKT3	MAPK1	KRAS	RAF1
KEGG	Neurotrophin signaling pathway	7.22E-11	8.24E-10	9.08E+00	8.87	467	10	IKBKB	MAPK8	PRDM4	BDNF	ARHGDIA	AKT3	BCL2	MAPK1	KRAS	RAF1
KEGG	Human T-cell leukemia virus 1 infection	1.24E-10	1.37E-09	8.86E+00	8.22	298	12	IKBKB	MAP2K4	KAT2B	CCND3	MAPK8	CCND2	CCND1	CHUK	AKT3	PTEN	MAPK1	KRAS
KEGG	Human cytomegalovirus infection	1.70E-10	1.80E-09	8.74E+00	8.16	286	12	IKBKB	CDK6	CCND1	CHUK	RPS6KB1	AKT3	MAPK1	TSC1	KRAS	RAF1	MTOR	VEGFA
KEGG	Gastric cancer	6.69E-10	6.87E-09	8.16E+00	8.40	338	10	CCND1	RPS6KB1	HGF	AKT3	BCL2	MAPK1	KRAS	AXIN2	RAF1	MTOR
KEGG	Human immunodeficiency virus 1 infection	1.38E-09	1.37E-08	7.86E+00	7.98	252	11	IKBKB	MAPK8	WEE1	CHUK	RPS6KB1	AKT3	BCL2	MAPK1	KRAS	RAF1	MTOR
KEGG	AMPK signaling pathway	1.88E-09	1.81E-08	7.74E+00	8.49	359	9	CCND1	CAB39	RAB14	RPS6KB1	AKT3	TSC1	SIRT1	MTOR	IGF1R
KEGG	ErbB signaling pathway	2.55E-09	2.38E-08	7.62E+00	8.79	443	8	MAP2K4	MAPK8	RPS6KB1	AKT3	MAPK1	KRAS	RAF1	MTOR
KEGG	Endometrial cancer	4.52E-09	4.09E-08	7.39E+00	9.11	552	7	CCND1	AKT3	PTEN	MAPK1	KRAS	AXIN2	RAF1
KEGG	Insulin signaling pathway	6.07E-09	5.34E-08	7.27E+00	8.21	296	9	IKBKB	MAPK8	RPS6KB1	AKT3	MAPK1	TSC1	KRAS	RAF1	MTOR
KEGG	Measles	6.47E-09	5.54E-08	7.26E+00	8.19	293	9	IKBKB	CCND3	MAPK8	CCND2	CDK6	CCND1	CHUK	AKT3	BCL2
KEGG	Choline metabolism in cancer	8.65E-09	7.20E-08	7.14E+00	8.48	357	8	MAPK8	RPS6KB1	AKT3	MAPK1	TSC1	KRAS	RAF1	MTOR
KEGG	Apoptosis	8.85E-09	7.17E-08	7.14E+00	8.12	278	9	IKBKB	MAPK8	BCL2L11	CHUK	AKT3	BCL2	MAPK1	KRAS	RAF1
KEGG	AGE-RAGE signaling pathway in diabetic complications	9.37E-09	7.40E-08	7.13E+00	8.46	352	8	MAPK8	CCND1	AKT3	PIM1	BCL2	MAPK1	KRAS	VEGFA
KEGG	Central carbon metabolism in cancer	1.02E-08	7.87E-08	7.10E+00	8.88	472	7	AKT3	PTEN	MAPK1	KRAS	RAF1	MTOR	FGFR1
KEGG	Longevity regulating pathway	1.10E-08	8.24E-08	7.08E+00	8.42	342	8	HDAC2	RPS6KB1	AKT3	TSC1	KRAS	SIRT1	MTOR	IGF1R
KEGG	p53 signaling pathway	2.11E-08	1.55E-07	6.81E+00	8.68	409	7	CCND3	CCND2	CDK6	CCND1	PTEN	BCL2	PPM1D
KEGG	JAK-STAT signaling pathway	2.63E-08	1.88E-07	6.72E+00	7.85	231	9	CCND3	CCND2	CCND1	AKT3	PIM1	BCL2	RAF1	MTOR	SOCS5
KEGG	Hepatitis B	2.77E-08	1.94E-07	6.71E+00	7.84	229	9	IKBKB	MAP2K4	MAPK8	CHUK	AKT3	BCL2	MAPK1	KRAS	RAF1
KEGG	Thyroid hormone signaling pathway	3.03E-08	2.07E-07	6.68E+00	8.15	284	8	KAT2B	HDAC2	CCND1	AKT3	MAPK1	KRAS	RAF1	MTOR
KEGG	Cell cycle	5.11E-08	3.42E-07	6.47E+00	8.01	258	8	CDKN2D	CCND3	HDAC2	WEE1	CCND2	CDK6	CCND1	RAD21
KEGG	Apelin signaling pathway	1.11E-07	7.28E-07	6.14E+00	7.80	223	8	CCND1	RPS6KB1	AKT3	MAPK1	KRAS	RAF1	KLF2	MTOR
KEGG	Small cell lung cancer	1.27E-07	8.12E-07	6.09E+00	8.15	285	7	IKBKB	CDK6	CCND1	CHUK	AKT3	PTEN	BCL2
KEGG	VEGF signaling pathway	1.73E-07	1.09E-06	5.96E+00	8.56	377	6	AKT3	KDR	MAPK1	KRAS	RAF1	VEGFA
KEGG	Progesterone-mediated oocyte maturation	1.95E-07	1.20E-06	5.92E+00	8.02	260	7	MAPK8	AKT3	MAPK1	KRAS	RAF1	CPEB2	IGF1R
KEGG	Rap1 signaling pathway	2.07E-07	1.25E-06	5.90E+00	7.32	160	9	HGF	AKT3	KDR	MAPK1	KRAS	RAF1	IGF1R	VEGFA	FGFR1
KEGG	HIF-1 signaling pathway	2.09E-07	1.24E-06	5.91E+00	8.00	256	7	RPS6KB1	AKT3	BCL2	MAPK1	MTOR	IGF1R	VEGFA
KEGG	C-type lectin receptor signaling pathway	2.73E-07	1.59E-06	5.80E+00	7.92	242	7	IKBKB	MAPK8	CHUK	AKT3	MAPK1	KRAS	RAF1
KEGG	Hepatitis C	2.87E-07	1.64E-06	5.79E+00	7.53	185	8	IKBKB	CDK6	CCND1	CHUK	AKT3	MAPK1	KRAS	RAF1
KEGG	Non-small cell lung cancer	3.40E-07	1.90E-06	5.72E+00	8.33	322	6	CDK6	CCND1	AKT3	MAPK1	KRAS	RAF1
KEGG	Fc epsilon RI signaling pathway	4.07E-07	2.24E-06	5.65E+00	8.27	309	6	MAP2K4	MAPK8	AKT3	MAPK1	KRAS	RAF1
KEGG	Renal cell carcinoma	4.44E-07	2.40E-06	5.62E+00	8.24	303	6	HGF	AKT3	MAPK1	KRAS	RAF1	VEGFA
KEGG	B cell receptor signaling pathway	5.27E-07	2.80E-06	5.55E+00	8.18	291	6	IKBKB	CHUK	AKT3	MAPK1	KRAS	RAF1
KEGG	Sphingolipid signaling pathway	6.85E-07	3.58E-06	5.45E+00	7.64	199	7	MAPK8	AKT3	PTEN	BCL2	MAPK1	KRAS	RAF1
KEGG	Bladder cancer	7.71E-07	3.96E-06	5.40E+00	8.67	409	5	CCND1	MAPK1	KRAS	RAF1	VEGFA
KEGG	Relaxin signaling pathway	1.25E-06	6.29E-06	5.20E+00	7.45	174	7	MAP2K4	MAPK8	AKT3	MAPK1	KRAS	RAF1	VEGFA
KEGG	Viral carcinogenesis	2.05E-06	1.02E-05	4.99E+00	6.96	124	8	KAT2B	CCND3	HDAC2	CCND2	CDK6	CCND1	MAPK1	KRAS
KEGG	T cell receptor signaling pathway	4.22E-06	2.06E-05	4.69E+00	7.45	175	6	IKBKB	CHUK	AKT3	MAPK1	KRAS	RAF1
KEGG	Chagas disease (American trypanosomiasis	6/103	4.73E-06	5.33E+00	3.79	14	7	1700635511	IKBKB	MAP2K4	MAPK8	CHUK	AKT3	MAPK1
KEGG	Toll-like receptor signaling pathway	5.00E-06	2.37E-05	4.63E+00	7.39	168	6	IKBKB	MAP2K4	MAPK8	CHUK	AKT3	MAPK1
KEGG	Insulin resistance	6.23E-06	2.91E-05	4.54E+00	7.31	159	6	IKBKB	MAPK8	RPS6KB1	AKT3	PTEN	MTOR
KEGG	TNF signaling pathway	6.92E-06	3.18E-05	4.50E+00	7.27	154	6	IKBKB	MAP2K4	MAPK8	CHUK	AKT3	MAPK1
KEGG	Shigellosis	7.85E-06	3.56E-05	4.45E+00	7.75	215	5	IKBKB	MAPK8	CHUK	MAPK1	ITGA5
KEGG	Toxoplasmosis	8.08E-06	3.61E-05	4.44E+00	7.21	148	6	IKBKB	MAPK8	CHUK	AKT3	BCL2	MAPK1
KEGG	Epithelial cell signaling in Helicobacter pylori infection	9.81E-06	4.32E-05	4.36E+00	7.66	202	5	IKBKB	MAP2K4	MAPK8	CHUK	ADAM10
KEGG	Adipocytokine signaling pathway	1.05E-05	4.57E-05	4.34E+00	7.63	198	5	IKBKB	MAPK8	CHUK	AKT3	MTOR
KEGG	Estrogen signaling pathway	2.43E-05	1.04E-04	3.98E+00	6.79	111	6	AKT3	BCL2	MAPK1	KRAS	RAF1	ESR2
KEGG	Phospholipase D signaling pathway	3.75E-05	1.58E-04	3.80E+00	6.62	98	6	AKT3	MAPK1	TSC1	KRAS	RAF1	MTOR
KEGG	Type II diabetes mellitus	4.13E-05	1.72E-04	3.76E+00	7.71	209	4	IKBKB	MAPK8	MAPK1	MTOR
KEGG	GnRH signaling pathway	4.51E-05	1.85E-04	3.73E+00	7.00	128	5	MAP2K4	MAPK8	MAPK1	KRAS	RAF1
KEGG	Hippo signaling pathway	5.80E-05	2.35E-04	3.63E+00	6.44	87	6	YAP1	CCND3	BMPR2	CCND2	CCND1	AXIN2
KEGG	Influenza A	8.38E-05	3.35E-04	3.47E+00	6.29	78	6	IKBKB	MAP2K4	MAPK8	AKT3	MAPK1	RAF1
KEGG	Th17 cell differentiation	8.80E-05	3.48E-04	3.46E+00	6.70	104	5	IKBKB	MAPK8	CHUK	MAPK1	MTOR
KEGG	Tuberculosis	1.08E-04	4.20E-04	3.38E+00	6.19	73	6	MAPK8	AKT3	BCL2	MAPK1	RAF1	RAB5A
KEGG	Serotonergic synapse	1.14E-04	4.39E-04	3.36E+00	6.58	96	5	APP	MAPK1	KRAS	RAF1	SLC6A4
KEGG	Long-term depression	1.18E-04	4.49E-04	3.35E+00	7.17	144	4	MAPK1	KRAS	RAF1	IGF1R
KEGG	Chemokine signaling pathway	1.49E-04	5.61E-04	3.25E+00	6.05	66	6	IKBKB	CHUK	AKT3	MAPK1	KRAS	RAF1
KEGG	Osteoclast differentiation	1.97E-04	7.32E-04	3.14E+00	6.32	80	5	IKBKB	MAPK8	CHUK	AKT3	MAPK1
KEGG	Thyroid cancer	5.01E-04	0.001836632	2.74E+00	7.20	147	3	CCND1	MAPK1	KRAS
KEGG	Wnt signaling pathway	5.39E-04	0.001954683	2.71E+00	5.83	57	5	CCND3	MAPK8	CCND2	CCND1	AXIN2
KEGG	TGF-beta signaling pathway	5.62E-04	0.00201318	2.70E+00	6.31	79	4	BMPR2	RPS6KB1	MAPK1	ACVR2A
KEGG	Fc gamma R-mediated phagocytosis	5.86E-04	0.00207493	2.68E+00	6.28	78	4	RPS6KB1	AKT3	MAPK1	RAF1
KEGG	Th1 and Th2 cell differentiation	6.11E-04	0.002137789	2.67E+00	6.26	77	4	IKBKB	MAPK8	CHUK	MAPK1
KEGG	IL-17 signaling pathway	6.36E-04	0.002201762	2.66E+00	6.24	75	4	IKBKB	MAPK8	CHUK	MAPK1
KEGG	NOD-like receptor signaling pathway	9.24E-04	0.003161114	2.50E+00	5.55	47	5	IKBKB	MAPK8	CHUK	BCL2	MAPK1
KEGG	Alcoholism	9.71E-04	0.003286581	2.48E+00	5.52	46	5	HDAC2	BDNF	MAPK1	KRAS	RAF1
KEGG	Hedgehog signaling pathway	0.001014191	0.003395335	2.47E+00	6.71	105	3	CCND2	CCND1	BCL2
KEGG	Parathyroid hormone synthesis, secretion and action	0.001038703	0.003440004	2.46E+00	5.95	62	4	BCL2	MAPK1	RAF1	FGFR1
KEGG	Notch signaling pathway	0.001078542	0.003533945	2.45E+00	6.67	102	3	NCOR2	KAT2B	HDAC2
KEGG	Cholinergic synapse	0.001274144	0.004130911	2.38E+00	5.82	57	4	AKT3	BCL2	MAPK1	KRAS
KEGG	cAMP signaling pathway	0.001999588	0.006415345	2.19E+00	5.13	35	5	MAPK8	BDNF	AKT3	MAPK1	RAF1
KEGG	Regulation of actin cytoskeleton	0.002083031	0.00661416	2.18E+00	5.10	34	5	MAPK1	KRAS	ITGA5	RAF1	FGFR1
KEGG	Long-term potentiation	0.002820956	0.008865863	2.05E+00	5.97	63	3	MAPK1	KRAS	RAF1
KEGG	Thermogenesis	0.002898505	0.00901757	2.04E+00	4.91	30	5	RPS6KB1	TSC1	KRAS	MTOR	FGFR1
KEGG	RIG-I-like receptor signaling pathway	0.003194479	0.009838995	2.01E+00	5.87	59	3	IKBKB	MAPK8	CHUK
KEGG	Adherens junction	0.003459557	0.010549936	1.98E+00	5.81	56	3	MAPK1	IGF1R	FGFR1
KEGG	Non-alcoholic fatty liver disease (NAFLD	4/149	0.00359844	2.44E+00	2.68	6	5	359683915	IKBKB	MAPK8	BCL2L11	AKT3
KEGG	Oxytocin signaling pathway	0.003954695	0.01182569	1.93E+00	5.11	34	4	CCND1	MAPK1	KRAS	RAF1
KEGG	Pertussis	0.004029176	0.011932559	1.92E+00	5.70	52	3	MAPK8	MAPK1	ITGA5
KEGG	Cushing syndrome	0.004141474	0.012148325	1.92E+00	5.08	34	4	CDK6	CCND1	MAPK1	AXIN2
KEGG	Herpes simplex virus 1 infection	0.004636843	0.01347309	1.87E+00	4.19	18	7	IKBKB	CHUK	AKT3	BCL2	TSC1	ITGA5	MTOR
KEGG	Alzheimer disease	0.005854542	0.016852326	1.77E+00	4.84	29	4	BACE1	APP	ADAM10	MAPK1
KEGG	Gap junction	0.006066893	0.017301879	1.76E+00	5.37	41	3	MAPK1	KRAS	RAF1
KEGG	Axon guidance	0.007135083	0.020161519	1.70E+00	4.70	26	4	BMPR2	MAPK1	KRAS	RAF1
KEGG	NF-kappa B signaling pathway	0.007493598	0.020982075	1.68E+00	5.20	37	3	IKBKB	CHUK	BCL2
KEGG	Transcriptional misregulation in cancer	0.007839637	0.021753227	1.66E+00	4.63	25	4	HDAC2	CCNT2	CCND2	IGF1R
KEGG	Melanogenesis	0.008861623	0.024369463	1.61E+00	5.06	33	3	MAPK1	KRAS	RAF1
KEGG	Aldosterone-regulated sodium reabsorption	0.010553538	0.028765395	1.54E+00	5.87	59	2	MAPK1	KRAS
KEGG	Vasopressin-regulated water reabsorption	0.014709297	0.039740907	1.40E+00	5.51	46	2	ARHGDIA	RAB5A
KEGG	Oocyte meiosis	0.015728325	0.042124558	1.38E+00	4.57	24	3	MAPK1	CPEB2	IGF1R
KEGG	Natural killer cell mediated cytotoxicity	0.017803036	0.047270131	1.33E+00	4.46	22	3	MAPK1	KRAS	RAF1
KEGG	Amyotrophic lateral sclerosis (ALS	1951-02-01	0.019453876	1.71E+00	3.22	9	3	3678533094	BCL2	RAB5A
KEGG	Adrenergic signaling in cardiomyocytes	0.023210981	0.060584595	1.22E+00	4.21	19	3	AKT3	BCL2	MAPK1
KEGG	Cytosolic DNA-sensing pathway	0.028851983	0.07467572	1.13E+00	4.74	27	2	IKBKB	CHUK
KEGG	Mitophagy	0.030563632	0.078446656	1.11E+00	4.68	26	2	MAPK8	KRAS
KEGG	cGMP-PKG signaling pathway	0.03281409	0.083526774	1.08E+00	3.88	15	3	AKT3	MAPK1	RAF1
KEGG	Salmonella infection	0.050773541	0.128182383	8.92E-01	4.04	17	2	MAPK8	MAPK1
KEGG	Phosphatidylinositol signaling system	0.065097909	0.163009398	7.88E-01	3.72	13	2	PTEN	CDS2
KEGG	Phenylalanine metabolism	0.069077047	0.17157847	7.66E-01	5.23	37	1	MIF
KEGG	Glucagon signaling pathway	0.06974878	0.171860993	7.65E-01	3.62	12	2	AKT3	SIRT1
KEGG	Platelet activation	0.095795415	0.23416657	6.30E-01	3.17	9	2	AKT3	MAPK1
KEGG	Dopaminergic synapse	0.105013288	0.254677895	5.94E-01	3.03	8	2	MAPK8	AKT3
KEGG	Vascular smooth muscle contraction	0.106349448	0.255903359	5.92E-01	3.02	8	2	MAPK1	RAF1
KEGG	Retrograde endocannabinoid signaling	0.128318714	0.306373363	5.14E-01	2.72	7	2	MAPK8	MAPK1
KEGG	Base excision repair	0.129774525	0.307465799	5.12E-01	3.88	15	1	UNG
KEGG	Phagosome	0.133968534	0.314979455	5.02E-01	2.65	6	2	ITGA5	RAB5A
KEGG	Prion diseases	0.137081271	0.319856298	4.95E-01	3.76	14	1	MAPK1
KEGG	Tyrosine metabolism	0.140711877	0.325859084	4.87E-01	3.70	13	1	MIF
KEGG	Primary immunodeficiency	0.14432739	0.331737583	4.79E-01	3.64	12	1	UNG
KEGG	Necroptosis	0.148330277	0.33841278	4.71E-01	2.49	6	2	MAPK8	BCL2
KEGG	Protein processing in endoplasmic reticulum	0.152699152	0.345818668	4.61E-01	2.44	5	2	MAPK8	BCL2
KEGG	Tight junction	0.160036536	0.359790168	4.44E-01	2.36	5	2	MAPK8	CCND1
KEGG	Carbohydrate digestion and absorption	0.169218519	0.377676115	4.23E-01	3.27	10	1	AKT3
KEGG	Cocaine addiction	0.186558517	0.413381462	3.84E-01	3.03	8	1	BDNF
KEGG	Malaria	0.186558517	0.410428737	3.87E-01	3.03	8	1	HGF
KEGG	Ovarian steroidogenesis	0.186558517	0.407517895	3.90E-01	3.03	8	1	IGF1R
KEGG	Cholesterol metabolism	0.189983357	0.412076577	3.85E-01	2.98	8	1	MYLIP
KEGG	Huntington disease	0.194534994	0.418998448	3.78E-01	2.01	4	2	HDAC2	BDNF
KEGG	Regulation of lipolysis in adipocytes	0.206894995	0.442525407	3.54E-01	2.77	7	1	AKT3
KEGG	Viral myocarditis	0.220172706	0.467677196	3.30E-01	2.61	6	1	CCND1
KEGG	Basal cell carcinoma	0.233230731	0.492020995	3.08E-01	2.46	6	1	AXIN2
KEGG	Amphetamine addiction	0.249249796	0.522237668	2.82E-01	2.28	5	1	SIRT1
KEGG	Arrhythmogenic right ventricular cardiomyopathy (ARVC	1972-01-01	0.261826573	5.82E-01	1.73	3	2	4431458102	ITGA5
KEGG	Bacterial invasion of epithelial cells	0.268036663	0.554062364	2.56E-01	2.08	4	1	ITGA5
KEGG	Inositol phosphate metabolism	0.268036663	0.550368615	2.59E-01	2.08	4	1	PTEN
KEGG	Leishmaniasis	0.268036663	0.54672379	2.62E-01	2.08	4	1	MAPK1
KEGG	Endocytosis	0.273423874	0.554043113	2.56E-01	1.34	3	2	RAB5A	IGF1R
KEGG	Synaptic vesicle cycle	0.280302386	0.564268855	2.49E-01	1.96	4	1	SLC6A4
KEGG	ECM-receptor interaction	0.292364974	0.584729948	2.33E-01	1.84	4	1	ITGA5
KEGG	Hypertrophic cardiomyopathy (HCM	1985-01-01	0.30128061	5.21E-01	1.49	3	2	3360541142	ITGA5
KEGG	Dilated cardiomyopathy (DCM	1991-01-01	0.31878022	4.97E-01	1.39	3	2	2991243794	ITGA5
KEGG	Rheumatoid arthritis	0.31878022	0.625377757	2.04E-01	1.58	3	1	VEGFA
KEGG	Amoebiasis	0.333031863	0.649201353	1.88E-01	1.45	3	1	RAB5A
KEGG	Circadian entrainment	0.335846635	0.650570841	1.87E-01	1.42	3	1	MAPK1
KEGG	Glycerophospholipid metabolism	0.335846635	0.646504773	1.89E-01	1.42	3	1	CDS2
KEGG	Hematopoietic cell lineage	0.335846635	0.642489215	1.92E-01	1.42	3	1	ITGA5
KEGG	Inflammatory mediator regulation of TRP channels	0.344220717	0.654444325	1.84E-01	1.34	3	1	MAPK8
KEGG	Cytokine-cytokine receptor interaction	0.350700472	0.662673285	1.79E-01	0.76	2	2	BMPR2	ACVR2A
KEGG	Glutamatergic synapse	0.381940686	0.71730324	1.44E-01	1.01	2	1	MAPK1
KEGG	Ubiquitin mediated proteolysis	0.43930838	0.820042309	8.62E-02	0.52	1	1	FBXW7
KEGG	Cell adhesion molecules (CAMs	1/145	0.458002357	3.39E-01	0.72	2	2	1282234728	CADM1

## Sheet: Reactome
	Term	P-value	Adj. P-value	neg.log10.padj	log2(c. score)	C. Score	n Genes	Genes
Reactome	Signal Transduction	4.52E-13	6.92E-10	9.16E+00	6.67	1015868241	37	YAP1	APP	HDAC2	BMPR2	CCNT2	PRDM4	CAB39	PTEN	IGF1R	IKBKB	RGS5	CCND3	MAPK8	DUSP10	BCL2L11	CCND1	ARHGDIA	AKT3	KDR	MAPK1	RICTOR	SOX6	CHUK	FBXW7	ADAM10	TSC1	AXIN2	ACVR2A	MTOR	VEGFA	NCOR2	KAT2B	RPS6KB1	KRAS	MAPRE1	RAF1	FGFR1
Reactome	Signalling by NGF	5.20E-11	3.98E-08	7.40E+00	7.65	2004586645	16	HDAC2	PRDM4	CHUK	PTEN	MTOR	IKBKB	MAPK8	DUSP10	BCL2L11	ARHGDIA	AKT3	MAPK1	RICTOR	KRAS	RAF1	FGFR1
Reactome	Fc epsilon receptor (FCERI) signaling	1.01E-08	5.13E-06	5.29E+00	7.17	1442983179	13	MAP2K4	CHUK	PTEN	MTOR	IKBKB	MAPK8	DUSP10	AKT3	MAPK1	RICTOR	KRAS	RAF1	FGFR1
Reactome	Diseases of signal transduction	3.34E-08	1.28E-05	4.89E+00	7.29	1565550222	11	NCOR2	KAT2B	HDAC2	CHUK	FBXW7	AKT3	ADAM10	RICTOR	KRAS	MTOR	FGFR1
Reactome	Downstream signaling events of B Cell Receptor (BCR)	1.14E-07	3.48E-05	4.46E+00	7.48	1784639623	9	IKBKB	CHUK	AKT3	PTEN	MAPK1	RICTOR	KRAS	MTOR	FGFR1
Reactome	Activation of BH3-only proteins	1.27E-07	3.24E-05	4.49E+00	9.35	651826423	5	MAPK8	BCL2L11	AKT3	BCL2	TP63
Reactome	Signaling by ERBB4	1.33E-07	2.90E-05	4.54E+00	6.97	1256723688	11	YAP1	DUSP10	CHUK	AKT3	PTEN	MAPK1	RICTOR	KRAS	RAF1	MTOR	FGFR1
Reactome	Signaling by EGFR	2.76E-07	5.27E-05	4.28E+00	6.80	1114301453	11	DUSP10	CHUK	AKT3	PTEN	ADAM10	MAPK1	RICTOR	KRAS	RAF1	MTOR	FGFR1
Reactome	Disease	3.07E-07	5.22E-05	4.28E+00	6.21	7386905149	15	MAP2K4	HDAC2	CCNT2	CHUK	FBXW7	HMGA1	ADAM10	MTOR	IKBKB	NCOR2	KAT2B	AKT3	RICTOR	KRAS	FGFR1
Reactome	IGF1R signaling cascade	3.54E-07	5.42E-05	4.27E+00	6.94	1227987542	10	DUSP10	CAB39	RPS6KB1	MAPK1	TSC1	KRAS	RAF1	MTOR	IGF1R	FGFR1
Reactome	Signaling by Type 1 Insulin-like Growth Factor 1 Receptor (IGF1R)	3.54E-07	4.92E-05	4.31E+00	6.94	1227987542	10	DUSP10	CAB39	RPS6KB1	MAPK1	TSC1	KRAS	RAF1	MTOR	IGF1R	FGFR1
Reactome	IRS-related events triggered by IGF1R	3.54E-07	4.51E-05	4.35E+00	6.94	1227987542	10	DUSP10	CAB39	RPS6KB1	MAPK1	TSC1	KRAS	RAF1	MTOR	IGF1R	FGFR1
Reactome	Hemostasis	4.88E-07	5.75E-05	4.24E+00	6.35	8148673072	13	APP	HDAC2	HGF	MIF	VEGFA	WEE1	AKT3	MYB	MAPK1	KRAS	ITGA5	RAF1	RAB5A
Reactome	G1 Phase	5.21E-07	5.70E-05	4.24E+00	8.82	4532170094	5	CDKN2D	CCND3	CCND2	CDK6	CCND1
Reactome	Cyclin D associated events in G1	5.21E-07	5.32E-05	4.27E+00	8.82	4532170094	5	CDKN2D	CCND3	CCND2	CDK6	CCND1
Reactome	TRAF6 Mediated Induction of proinflammatory cytokines	5.73E-07	5.48E-05	4.26E+00	8.16	2851576726	6	IKBKB	APP	MAP2K4	MAPK8	CHUK	MAPK1
Reactome	Signaling by the B Cell Receptor (BCR)	5.84E-07	5.26E-05	4.28E+00	7.04	1320061918	9	IKBKB	CHUK	AKT3	PTEN	MAPK1	RICTOR	KRAS	MTOR	FGFR1
Reactome	PI-3K cascade:FGFR1	8.11E-07	6.90E-05	4.16E+00	7.58	1915941804	7	CHUK	AKT3	PTEN	MAPK1	RICTOR	MTOR	FGFR1
Reactome	PI-3K cascade:FGFR3	8.11E-07	6.53E-05	4.18E+00	7.58	1915941804	7	CHUK	AKT3	PTEN	MAPK1	RICTOR	MTOR	FGFR1
Reactome	PI3K events in ERBB4 signaling	8.11E-07	6.21E-05	4.21E+00	7.58	1915941804	7	CHUK	AKT3	PTEN	MAPK1	RICTOR	MTOR	FGFR1
Reactome	PIP3 activates AKT signaling	8.11E-07	5.91E-05	4.23E+00	7.58	1915941804	7	CHUK	AKT3	PTEN	MAPK1	RICTOR	MTOR	FGFR1
Reactome	PI-3K cascade:FGFR4	8.11E-07	5.64E-05	4.25E+00	7.58	1915941804	7	CHUK	AKT3	PTEN	MAPK1	RICTOR	MTOR	FGFR1
Reactome	PI-3K cascade:FGFR2	8.11E-07	5.40E-05	4.27E+00	7.58	1915941804	7	CHUK	AKT3	PTEN	MAPK1	RICTOR	MTOR	FGFR1
Reactome	Intrinsic Pathway for Apoptosis	8.72E-07	5.56E-05	4.25E+00	8.63	3954736478	5	MAPK8	BCL2L11	AKT3	BCL2	TP63
Reactome	VEGFA-VEGFR2 Pathway	9.26E-07	5.67E-05	4.25E+00	6.69	1033668997	10	DUSP10	AKT3	KDR	MAPK1	RICTOR	KRAS	RAF1	MTOR	VEGFA	FGFR1
Reactome	GAB1 signalosome	9.56E-07	5.63E-05	4.25E+00	7.53	1848063219	7	CHUK	AKT3	PTEN	MAPK1	RICTOR	MTOR	FGFR1
Reactome	PI3K/AKT activation	9.56E-07	5.42E-05	4.27E+00	7.53	1848063219	7	CHUK	AKT3	PTEN	MAPK1	RICTOR	MTOR	FGFR1
Reactome	Signaling by SCF-KIT	1.07E-06	5.82E-05	4.23E+00	6.65	1007486772	10	DUSP10	CHUK	AKT3	PTEN	MAPK1	RICTOR	KRAS	RAF1	MTOR	FGFR1
Reactome	Signaling by VEGF	1.16E-06	6.11E-05	4.21E+00	6.63	9922458104	10	DUSP10	AKT3	KDR	MAPK1	RICTOR	KRAS	RAF1	MTOR	VEGFA	FGFR1
Reactome	Innate Immune System	1.19E-06	6.04E-05	4.22E+00	5.92	6038940118	15	APP	MAP2K4	CHUK	PTEN	MTOR	IKBKB	MAPK8	DUSP10	AKT3	BCL2	MAPK1	RICTOR	KRAS	RAF1	FGFR1
Reactome	Downstream signaling of activated FGFR2	1.19E-06	5.87E-05	4.23E+00	6.63	987241154	10	DUSP10	CHUK	AKT3	PTEN	MAPK1	RICTOR	KRAS	RAF1	MTOR	FGFR1
Reactome	Downstream signaling of activated FGFR4	1.19E-06	5.69E-05	4.24E+00	6.63	987241154	10	DUSP10	CHUK	AKT3	PTEN	MAPK1	RICTOR	KRAS	RAF1	MTOR	FGFR1
Reactome	Downstream signaling of activated FGFR3	1.19E-06	5.52E-05	4.26E+00	6.63	987241154	10	DUSP10	CHUK	AKT3	PTEN	MAPK1	RICTOR	KRAS	RAF1	MTOR	FGFR1
Reactome	Toll Like Receptor 10 (TLR10) Cascade	1.24E-06	5.59E-05	4.25E+00	7.89	2369051486	6	IKBKB	APP	MAP2K4	MAPK8	CHUK	MAPK1
Reactome	Toll Like Receptor 5 (TLR5) Cascade	1.24E-06	5.43E-05	4.27E+00	7.89	2369051486	6	IKBKB	APP	MAP2K4	MAPK8	CHUK	MAPK1
Reactome	MyD88 cascade initiated on plasma membrane	1.24E-06	5.28E-05	4.28E+00	7.89	2369051486	6	IKBKB	APP	MAP2K4	MAPK8	CHUK	MAPK1
Reactome	Signaling by FGFR4	1.29E-06	5.34E-05	4.27E+00	6.60	9724488002	10	DUSP10	CHUK	AKT3	PTEN	MAPK1	RICTOR	KRAS	RAF1	MTOR	FGFR1
Reactome	Downstream signaling of activated FGFR1	1.29E-06	5.20E-05	4.28E+00	6.60	9724488002	10	DUSP10	CHUK	AKT3	PTEN	MAPK1	RICTOR	KRAS	RAF1	MTOR	FGFR1
Reactome	Signaling by FGFR3	1.33E-06	5.21E-05	4.28E+00	6.60	9675906405	10	DUSP10	CHUK	AKT3	PTEN	MAPK1	RICTOR	KRAS	RAF1	MTOR	FGFR1
Reactome	p75 NTR receptor-mediated signalling	1.33E-06	5.11E-05	4.29E+00	7.86	2328168964	6	IKBKB	HDAC2	MAPK8	BCL2L11	PRDM4	ARHGDIA
Reactome	TRAF6 mediated induction of NFkB and MAP kinases upon TLR7/8 or 9 activation	1.33E-06	4.98E-05	4.30E+00	7.86	2328168964	6	IKBKB	APP	MAP2K4	MAPK8	CHUK	MAPK1
Reactome	Signaling by FGFR1	1.44E-06	5.24E-05	4.28E+00	6.57	9532289348	10	DUSP10	CHUK	AKT3	PTEN	MAPK1	RICTOR	KRAS	RAF1	MTOR	FGFR1
Reactome	MyD88 dependent cascade initiated on endosome	1.54E-06	5.47E-05	4.26E+00	7.81	2249753398	6	IKBKB	APP	MAP2K4	MAPK8	CHUK	MAPK1
Reactome	Toll Like Receptor 7/8 (TLR7/8) Cascade	1.54E-06	5.34E-05	4.27E+00	7.81	2249753398	6	IKBKB	APP	MAP2K4	MAPK8	CHUK	MAPK1
Reactome	Downstream signal transduction	1.64E-06	5.59E-05	4.25E+00	6.54	9299809713	10	DUSP10	CHUK	AKT3	PTEN	MAPK1	RICTOR	KRAS	RAF1	MTOR	FGFR1
Reactome	DAP12 signaling	1.78E-06	5.91E-05	4.23E+00	6.52	9164302808	10	DUSP10	CHUK	AKT3	PTEN	MAPK1	RICTOR	KRAS	RAF1	MTOR	FGFR1
Reactome	Toll Like Receptor 9 (TLR9) Cascade	1.88E-06	6.14E-05	4.21E+00	7.74	2139879624	6	IKBKB	APP	MAP2K4	MAPK8	CHUK	MAPK1
Reactome	Transcriptional Regulation by TP53	1.97E-06	6.28E-05	4.20E+00	6.49	8988091235	10	HDAC2	CCNT2	AKT3	PTEN	TSC1	RICTOR	RFFL	HIPK1	TP63	MTOR
Reactome	MyD88:Mal cascade initiated on plasma membrane	2.45E-06	7.64E-05	4.12E+00	7.65	2006301711	6	IKBKB	APP	MAP2K4	MAPK8	CHUK	MAPK1
Reactome	Toll Like Receptor TLR1:TLR2 Cascade	2.45E-06	7.49E-05	4.13E+00	7.65	2006301711	6	IKBKB	APP	MAP2K4	MAPK8	CHUK	MAPK1
Reactome	Toll Like Receptor TLR6:TLR2 Cascade	2.45E-06	7.34E-05	4.13E+00	7.65	2006301711	6	IKBKB	APP	MAP2K4	MAPK8	CHUK	MAPK1
Reactome	Toll Like Receptor 2 (TLR2) Cascade	2.45E-06	7.20E-05	4.14E+00	7.65	2006301711	6	IKBKB	APP	MAP2K4	MAPK8	CHUK	MAPK1
Reactome	DAP12 interactions	2.60E-06	7.51E-05	4.12E+00	6.41	8528335683	10	DUSP10	CHUK	AKT3	PTEN	MAPK1	RICTOR	KRAS	RAF1	MTOR	FGFR1
Reactome	Signaling by FGFR2	2.73E-06	7.75E-05	4.11E+00	6.40	8448448578	10	DUSP10	CHUK	AKT3	PTEN	MAPK1	RICTOR	KRAS	RAF1	MTOR	FGFR1
Reactome	Signaling by PDGF	2.94E-06	8.19E-05	4.09E+00	6.38	8330649504	10	DUSP10	CHUK	AKT3	PTEN	MAPK1	RICTOR	KRAS	RAF1	MTOR	FGFR1
Reactome	IRS-mediated signalling	3.00E-06	8.20E-05	4.09E+00	6.58	9594950115	9	DUSP10	CAB39	RPS6KB1	MAPK1	TSC1	KRAS	RAF1	MTOR	FGFR1
Reactome	Signaling by FGFR	3.09E-06	8.30E-05	4.08E+00	6.37	8253441963	10	DUSP10	CHUK	AKT3	PTEN	MAPK1	RICTOR	KRAS	RAF1	MTOR	FGFR1
Reactome	Cellular responses to stress	3.17E-06	8.35E-05	4.08E+00	6.36	821522841	10	CDKN2D	MAP2K4	MAPK8	CDK6	HMGA1	MAPK1	TSC1	SIRT1	MTOR	VEGFA
Reactome	Insulin receptor signalling cascade	3.27E-06	8.48E-05	4.07E+00	6.56	9430625917	9	DUSP10	CAB39	RPS6KB1	MAPK1	TSC1	KRAS	RAF1	MTOR	FGFR1
Reactome	MyD88-independent TLR3/TLR4 cascade	3.34E-06	8.50E-05	4.07E+00	7.54	1857290792	6	IKBKB	APP	MAP2K4	MAPK8	CHUK	MAPK1
Reactome	Toll Like Receptor 3 (TLR3) Cascade	3.34E-06	8.37E-05	4.08E+00	7.54	1857290792	6	IKBKB	APP	MAP2K4	MAPK8	CHUK	MAPK1
Reactome	TRIF-mediated TLR3/TLR4 signaling	3.34E-06	8.23E-05	4.08E+00	7.54	1857290792	6	IKBKB	APP	MAP2K4	MAPK8	CHUK	MAPK1
Reactome	Regulation of TP53 Activity	3.39E-06	8.23E-05	4.08E+00	7.12	1390225991	7	HDAC2	AKT3	RICTOR	RFFL	HIPK1	TP63	MTOR
Reactome	Constitutive Signaling by AKT1 E17K in Cancer	3.42E-06	8.19E-05	4.09E+00	8.91	4794189406	4	CHUK	AKT3	RICTOR	MTOR
Reactome	NGF signalling via TRKA from the plasma membrane	3.74E-06	8.81E-05	4.05E+00	6.31	7954798046	10	DUSP10	CHUK	AKT3	PTEN	MAPK1	RICTOR	KRAS	RAF1	MTOR	FGFR1
Reactome	Constitutive Signaling by NOTCH1 HD+PEST Domain Mutants	4.09E-06	9.47E-05	4.02E+00	8.02	2591457949	5	NCOR2	KAT2B	HDAC2	FBXW7	ADAM10
Reactome	Signaling by NOTCH1 in Cancer	4.09E-06	9.33E-05	4.03E+00	8.02	2591457949	5	NCOR2	KAT2B	HDAC2	FBXW7	ADAM10
Reactome	Signaling by NOTCH1 PEST Domain Mutants in Cancer	4.09E-06	9.19E-05	4.04E+00	8.02	2591457949	5	NCOR2	KAT2B	HDAC2	FBXW7	ADAM10
Reactome	Constitutive Signaling by NOTCH1 PEST Domain Mutants	4.09E-06	9.06E-05	4.04E+00	8.02	2591457949	5	NCOR2	KAT2B	HDAC2	FBXW7	ADAM10
Reactome	Signaling by NOTCH1 HD+PEST Domain Mutants in Cancer	4.09E-06	8.93E-05	4.05E+00	8.02	2591457949	5	NCOR2	KAT2B	HDAC2	FBXW7	ADAM10
Reactome	Developmental Biology	4.61E-06	9.93E-05	4.00E+00	5.70	5210980093	14	ADAM10	KLF4	ACVR2A	VEGFA	NCOR2	CCND3	DUSP10	AKT3	KDR	MAPK1	KRAS	ITGA5	RAF1	FGFR1
Reactome	MAP kinase activation in TLR cascade	5.28E-06	1.12E-04	3.95E+00	7.91	2411120522	5	IKBKB	MAP2K4	MAPK8	CHUK	MAPK1
Reactome	Role of LAT2/NTAL/LAB on calcium mobilization	5.39E-06	1.13E-04	3.95E+00	6.96	1248001718	7	CHUK	AKT3	PTEN	MAPK1	RICTOR	MTOR	FGFR1
Reactome	Signaling by Insulin receptor	6.27E-06	1.30E-04	3.89E+00	6.37	825409155	9	DUSP10	CAB39	RPS6KB1	MAPK1	TSC1	KRAS	RAF1	MTOR	FGFR1
Reactome	Generic Transcription Pathway	6.69E-06	1.36E-04	3.87E+00	5.61	489131778	14	YAP1	HDAC2	CCNT2	PTEN	TSC1	HIPK1	ESR2	MTOR	NCOR2	KAT2B	AKT3	RICTOR	RFFL	TP63
Reactome	Activated TLR4 signalling	7.68E-06	1.55E-04	3.81E+00	7.23	1502155058	6	IKBKB	APP	MAP2K4	MAPK8	CHUK	MAPK1
Reactome	Signaling by NOTCH	1.25E-05	2.49E-04	3.60E+00	7.05	132152322	6	NCOR2	KAT2B	HDAC2	CCND1	FBXW7	ADAM10
Reactome	Toll Like Receptor 4 (TLR4) Cascade	1.25E-05	2.46E-04	3.61E+00	7.05	132152322	6	IKBKB	APP	MAP2K4	MAPK8	CHUK	MAPK1
Reactome	Signaling by NOTCH1	1.30E-05	2.52E-04	3.60E+00	7.54	1860244003	5	NCOR2	KAT2B	HDAC2	FBXW7	ADAM10
Reactome	Regulation of TP53 Degradation	1.37E-05	2.63E-04	3.58E+00	8.25	30465924	4	AKT3	RICTOR	RFFL	MTOR
Reactome	Regulation of TP53 Expression and Degradation	1.54E-05	2.91E-04	3.54E+00	8.20	2931650599	4	AKT3	RICTOR	RFFL	MTOR
Reactome	PI3K Cascade	2.05E-05	3.82E-04	3.42E+00	7.35	1627037436	5	CAB39	RPS6KB1	TSC1	MTOR	FGFR1
Reactome	mTOR signalling	2.13E-05	3.92E-04	3.41E+00	8.04	2626953311	4	CAB39	RPS6KB1	TSC1	MTOR
Reactome	Mitotic G1-G1/S phases	2.33E-05	4.24E-04	3.37E+00	6.81	1120555803	6	CDKN2D	CCND3	WEE1	CCND2	CDK6	CCND1
Reactome	PKB-mediated events	2.36E-05	4.24E-04	3.37E+00	7.99	2536954158	4	CAB39	RPS6KB1	TSC1	MTOR
Reactome	Negative regulation of MAPK pathway	2.36E-05	4.19E-04	3.38E+00	7.99	2536954158	4	DUSP10	MAPK1	KRAS	RAF1
Reactome	Toll-Like Receptors Cascades	2.74E-05	4.82E-04	3.32E+00	6.74	1071823657	6	IKBKB	APP	MAP2K4	MAPK8	CHUK	MAPK1
Reactome	TP53 Regulates Metabolic Genes	2.76E-05	4.79E-04	3.32E+00	7.22	1487920868	5	AKT3	PTEN	TSC1	TP63	MTOR
Reactome	PI3K/AKT Signaling in Cancer	3.09E-05	5.31E-04	3.27E+00	7.17	1437543309	5	CHUK	AKT3	RICTOR	MTOR	FGFR1
Reactome	MAP3K8 (TPL2)-dependent MAPK1/3 activation	3.85E-05	6.54E-04	3.18E+00	8.83	4538198168	3	IKBKB	MAP2K4	CHUK
Reactome	Signaling by Interleukins	3.92E-05	6.59E-04	3.18E+00	5.79	5546562576	9	IKBKB	MAP2K4	DUSP10	CHUK	HGF	MAPK1	KRAS	RAF1	FGFR1
Reactome	Oxidative Stress Induced Senescence	4.06E-05	6.75E-04	3.17E+00	7.05	1322874064	5	CDKN2D	MAP2K4	MAPK8	CDK6	MAPK1
Reactome	NOTCH1 Intracellular Domain Regulates Transcription	4.50E-05	7.40E-04	3.13E+00	7.66	2028138388	4	NCOR2	KAT2B	HDAC2	FBXW7
Reactome	Nucleotide-binding domain, leucine rich repeat containing receptor (NLR) signaling pathways	4.50E-05	7.32E-04	3.14E+00	7.66	2028138388	4	IKBKB	APP	CHUK	BCL2
Reactome	Cellular Senescence	6.00E-05	9.66E-04	3.01E+00	6.43	8625551827	6	CDKN2D	MAP2K4	MAPK8	CDK6	HMGA1	MAPK1
Reactome	Immune System	6.15E-05	9.80E-04	3.01E+00	4.75	2686271585	18	APP	MAP2K4	MYLIP	CHUK	FBXW7	HGF	PTEN	MTOR	IKBKB	MAPK8	DUSP10	AKT3	BCL2	MAPK1	RICTOR	KRAS	RAF1	FGFR1
Reactome	Adaptive Immune System	7.82E-05	0.001233395	2.91E+00	5.15	3545667979	12	IKBKB	MYLIP	CHUK	FBXW7	AKT3	PTEN	MAPK1	RICTOR	KRAS	RAF1	MTOR	FGFR1
Reactome	VEGFR2 mediated cell proliferation	8.33E-05	0.001300216	2.89E+00	5.98	6312688282	7	DUSP10	KDR	MAPK1	KRAS	RAF1	VEGFA	FGFR1
Reactome	Signal transduction by L1	9.00E-05	0.001390863	2.86E+00	8.31	3168617022	3	MAPK1	ITGA5	FGFR1
Reactome	RIP-mediated NFkB activation via ZBP1	9.00E-05	0.001376954	2.86E+00	8.31	3168617022	3	IKBKB	APP	CHUK
Reactome	CD28 dependent PI3K/Akt signaling	1.04E-04	0.001573803	2.80E+00	8.22	2977974962	3	AKT3	RICTOR	MTOR
Reactome	TRAF6 mediated NF-kB activation	1.36E-04	0.002035767	2.69E+00	8.05	265027764	3	IKBKB	APP	CHUK
Reactome	Cell Cycle, Mitotic	1.38E-04	0.002044223	2.69E+00	5.37	4123855062	9	CDKN2D	CCND3	WEE1	CCND2	CDK6	CCND1	RAD21	MAPK1	MAPRE1
Reactome	ZBP1(DAI) mediated induction of type I IFNs	1.73E-04	0.002549325	2.59E+00	7.89	2379274374	3	IKBKB	APP	CHUK
Reactome	TAK1 activates NFkB by phosphorylation and activation of IKKs complex	1.73E-04	0.002525046	2.60E+00	7.89	2379274374	3	IKBKB	APP	CHUK
Reactome	VEGFR2 mediated vascular permeability	1.94E-04	0.002805364	2.55E+00	7.82	2260795179	3	AKT3	RICTOR	MTOR
Reactome	FCERI mediated MAPK activation	2.14E-04	0.00306489	2.51E+00	5.61	4871936423	7	MAP2K4	MAPK8	DUSP10	MAPK1	KRAS	RAF1	FGFR1
Reactome	Energy dependent regulation of mTOR by LKB1-AMPK	2.17E-04	0.003074494	2.51E+00	7.75	2151914979	3	CAB39	TSC1	MTOR
Reactome	YAP1- and WWTR1 (TAZ)-stimulated gene expression	2.41E-04	0.003387506	2.47E+00	7.68	2051560736	3	YAP1	KAT2B	HIPK1
Reactome	p75NTR negatively regulates cell cycle via SC1	2.59E-04	0.003597011	2.44E+00	9.36	6555710118	2	HDAC2	PRDM4
Reactome	Negative feedback regulation of MAPK pathway	2.59E-04	0.003564605	2.45E+00	9.36	6555710118	2	MAPK1	RAF1
Reactome	Axon guidance	3.08E-04	0.004208372	2.38E+00	5.07	3364162387	9	DUSP10	KDR	ADAM10	MAPK1	KRAS	ITGA5	RAF1	VEGFA	FGFR1
Reactome	Oncogene Induced Senescence	3.25E-04	0.004395374	2.36E+00	7.49	1793044186	3	CDKN2D	CDK6	MAPK1
Reactome	CD28 co-stimulation	3.56E-04	0.004778013	2.32E+00	7.43	1718734856	3	AKT3	RICTOR	MTOR
Reactome	IkBA variant leads to EDA-ID	3.61E-04	0.004803727	2.32E+00	9.07	539214557	2	IKBKB	CHUK
Reactome	VEGF ligand-receptor interactions	4.80E-04	0.006332437	2.20E+00	8.83	4548513696	2	KDR	VEGFA
Reactome	VEGF binds to VEGFR leading to receptor dimerization	4.80E-04	0.006278313	2.20E+00	8.83	4548513696	2	KDR	VEGFA
Reactome	BH3-only proteins associate with and inactivate anti-apoptotic BCL-2 members	4.80E-04	0.006225107	2.21E+00	8.83	4548513696	2	BCL2L11	BCL2
Reactome	IKBKG deficiency causes anhidrotic ectodermal dysplasia with immunodeficiency (EDA-ID) (via TLR)	4.80E-04	0.006172795	2.21E+00	8.83	4548513696	2	IKBKB	CHUK
Reactome	MAP2K and MAPK activation	5.42E-04	0.006912939	2.16E+00	7.14	1413513476	3	MAPK1	KRAS	RAF1
Reactome	Negative regulation of the PI3K/AKT network	5.62E-04	0.00710782	2.15E+00	6.31	7919356854	4	AKT3	PTEN	MAPK1	FGFR1
Reactome	Cell Cycle	6.10E-04	0.007651199	2.12E+00	4.81	2802332726	9	CDKN2D	CCND3	WEE1	CCND2	CDK6	CCND1	RAD21	MAPK1	MAPRE1
Reactome	SHC-related events triggered by IGF1R	6.16E-04	0.007657417	2.12E+00	8.61	3911597441	2	KRAS	IGF1R
Reactome	Apoptosis	6.21E-04	0.007667074	2.12E+00	5.75	5392610046	5	MAPK8	BCL2L11	AKT3	BCL2	TP63
Reactome	Programmed Cell Death	6.75E-04	0.00825995	2.08E+00	5.71	5235976765	5	MAPK8	BCL2L11	AKT3	BCL2	TP63
Reactome	Platelet activation, signaling and aggregation	6.89E-04	0.008362805	2.08E+00	5.36	4111068604	6	APP	HGF	AKT3	MAPK1	RAF1	VEGFA
Reactome	Activation of the AP-1 family of transcription factors	7.67E-04	0.009245025	2.03E+00	8.42	3415478858	2	MAPK8	MAPK1
Reactome	IRAK1 recruits IKK complex	7.67E-04	0.009172799	2.04E+00	8.42	3415478858	2	IKBKB	CHUK
Reactome	IRAK1 recruits IKK complex upon TLR7/8 or 9 stimulation	7.67E-04	0.009101692	2.04E+00	8.42	3415478858	2	IKBKB	CHUK
Reactome	Interleukin-1 signaling	8.36E-04	0.009837976	2.01E+00	6.85	1150486009	3	IKBKB	MAP2K4	CHUK
Reactome	Physiological factors	0.00111939	0.013073792	1.88E+00	8.07	2696417199	2	KAT2B	HIPK1
Reactome	NF-kB activation through FADD/RIP-1 pathway mediated by caspase-8 and -10	0.00111939	0.012974748	1.89E+00	8.07	2696417199	2	IKBKB	CHUK
Reactome	Cytokine Signaling in Immune system	0.001160151	0.013346102	1.87E+00	4.55	2336130693	9	IKBKB	MAP2K4	DUSP10	CHUK	HGF	MAPK1	KRAS	RAF1	FGFR1
Reactome	MAPK family signaling cascades	0.001251347	0.014287765	1.85E+00	5.07	3361939079	6	CCND3	DUSP10	MAPK1	KRAS	RAF1	FGFR1
Reactome	AKT phosphorylates targets in the cytosol	0.001319312	0.014952198	1.83E+00	7.92	2428807763	2	CHUK	AKT3
Reactome	Advanced glycosylation endproduct receptor signaling	0.001319312	0.014842256	1.83E+00	7.92	2428807763	2	APP	MAPK1
Reactome	Regulation of TP53 Activity through Association with Co-factors	0.001535005	0.017142755	1.77E+00	7.78	2203816907	2	AKT3	TP63
Reactome	Activation of BAD and translocation to mitochondria	0.001766337	0.019583303	1.71E+00	7.65	2012332477	2	AKT3	BCL2
Reactome	C-type lectin receptors (CLRs)	0.001798654	0.019798132	1.70E+00	5.61	4894089655	4	IKBKB	CHUK	KRAS	RAF1
Reactome	JNK (c-Jun kinases) phosphorylation and activation mediated by activated human TAK1	0.002013176	0.022001141	1.66E+00	7.53	1847631422	2	MAP2K4	MAPK8
Reactome	Inflammasomes	0.002275391	0.024690414	1.61E+00	7.41	170465079	2	APP	BCL2
Reactome	Cytosolic sensors of pathogen-associated DNA	0.002702768	0.029121372	1.54E+00	6.00	6399868937	3	IKBKB	APP	CHUK
Reactome	Factors involved in megakaryocyte development and platelet production	0.002952685	0.03159166	1.50E+00	5.30	3934508947	4	HDAC2	WEE1	MYB	RAB5A
Reactome	Gene Expression	0.003041662	0.032317656	1.49E+00	3.67	1269017973	15	YAP1	HDAC2	CCNT2	PTEN	TSC1	HIPK1	SIRT1	ESR2	MTOR	NCOR2	KAT2B	AKT3	RICTOR	RFFL	TP63
Reactome	GRB2 events in EGFR signaling	0.003119812	0.0329194	1.48E+00	4.87	2922990072	5	DUSP10	MAPK1	KRAS	RAF1	FGFR1
Reactome	SHC1 events in EGFR signaling	0.003119812	0.032693925	1.49E+00	4.87	2922990072	5	DUSP10	MAPK1	KRAS	RAF1	FGFR1
Reactome	SOS-mediated signalling	0.003119812	0.032471517	1.49E+00	4.87	2922990072	5	DUSP10	MAPK1	KRAS	RAF1	FGFR1
Reactome	SHC1 events in ERBB4 signaling	0.003119812	0.032252115	1.49E+00	4.87	2922990072	5	DUSP10	MAPK1	KRAS	RAF1	FGFR1
Reactome	RAF/MAP kinase cascade	0.003119812	0.032035658	1.49E+00	4.87	2922990072	5	DUSP10	MAPK1	KRAS	RAF1	FGFR1
Reactome	FRS-mediated FGFR2 signaling	0.003176995	0.032405346	1.49E+00	4.86	2901442496	5	DUSP10	MAPK1	KRAS	RAF1	FGFR1
Reactome	FRS-mediated FGFR4 signaling	0.003176995	0.032190741	1.49E+00	4.86	2901442496	5	DUSP10	MAPK1	KRAS	RAF1	FGFR1
Reactome	FRS-mediated FGFR3 signaling	0.003176995	0.031978959	1.50E+00	4.86	2901442496	5	DUSP10	MAPK1	KRAS	RAF1	FGFR1
Reactome	FRS-mediated FGFR1 signaling	0.003176995	0.031769947	1.50E+00	4.86	2901442496	5	DUSP10	MAPK1	KRAS	RAF1	FGFR1
Reactome	ARMS-mediated activation	0.003353084	0.033313111	1.48E+00	4.83	2838152347	5	DUSP10	MAPK1	KRAS	RAF1	FGFR1
Reactome	Signalling to p38 via RIT and RIN	0.003353084	0.033098188	1.48E+00	4.83	2838152347	5	DUSP10	MAPK1	KRAS	RAF1	FGFR1
Reactome	Frs2-mediated activation	0.003413314	0.033476734	1.48E+00	4.82	281749583	5	DUSP10	MAPK1	KRAS	RAF1	FGFR1
Reactome	Costimulation by the CD28 family	0.003459557	0.033714155	1.47E+00	5.81	5621641576	3	AKT3	RICTOR	MTOR
Reactome	MAPK1/MAPK3 signaling	0.00347432	0.033643729	1.47E+00	4.81	2797054228	5	DUSP10	MAPK1	KRAS	RAF1	FGFR1
Reactome	CD209 (DC-SIGN) signaling	0.003475412	0.033442644	1.48E+00	7.00	1283909805	2	KRAS	RAF1
Reactome	SHC-mediated cascade:FGFR1	0.003475412	0.033233627	1.48E+00	7.00	1283909805	2	KRAS	FGFR1
Reactome	Prolonged ERK activation events	0.003536107	0.033603998	1.47E+00	4.80	2776824514	5	DUSP10	MAPK1	KRAS	RAF1	FGFR1
Reactome	Signaling by Leptin	0.003598682	0.033987548	1.47E+00	4.78	2756803714	5	DUSP10	MAPK1	KRAS	RAF1	FGFR1
Reactome	Interleukin receptor SHC signaling	0.003726215	0.034976127	1.46E+00	4.76	2717377233	5	DUSP10	MAPK1	KRAS	RAF1	FGFR1
Reactome	Signalling to RAS	0.003791185	0.035368981	1.45E+00	4.75	2697965867	5	DUSP10	MAPK1	KRAS	RAF1	FGFR1
Reactome	mTORC1-mediated signalling	0.003812566	0.035352881	1.45E+00	6.91	1205509291	2	RPS6KB1	MTOR
Reactome	Signaling by BMP	0.004164325	0.038382027	1.42E+00	6.83	1134824264	2	BMPR2	ACVR2A
Reactome	Regulation of TP53 Activity through Acetylation	0.004164325	0.038152195	1.42E+00	6.83	1134824264	2	HDAC2	AKT3
Reactome	RAF-independent MAPK1/3 activation	0.004164325	0.037925098	1.42E+00	6.83	1134824264	2	DUSP10	MAPK1
Reactome	Senescence-Associated Secretory Phenotype (SASP)	0.004179942	0.037842082	1.42E+00	5.67	5081129702	3	CDKN2D	CDK6	MAPK1
Reactome	Interleukin-2 signaling	0.004198207	0.037783863	1.42E+00	4.69	2585552599	5	DUSP10	MAPK1	KRAS	RAF1	FGFR1
Reactome	Signalling to ERKs	0.004268963	0.038195988	1.42E+00	4.68	2567468589	5	DUSP10	MAPK1	KRAS	RAF1	FGFR1
Reactome	Transcriptional regulation of white adipocyte differentiation	0.004491672	0.039954985	1.40E+00	5.61	4887459646	3	NCOR2	CCND3	KLF4
Reactome	RIG-I/MDA5 mediated induction of IFN-alpha/beta pathways	0.004491672	0.039724031	1.40E+00	5.61	4887459646	3	IKBKB	APP	CHUK
Reactome	Diseases associated with the TLR signaling cascade	0.004530563	0.03983771	1.40E+00	6.74	1070815286	2	IKBKB	CHUK
Reactome	Diseases of Immune System	0.004530563	0.039610066	1.40E+00	6.74	1070815286	2	IKBKB	CHUK
Reactome	IKK complex recruitment mediated by RIP1	0.004530563	0.039385009	1.40E+00	6.74	1070815286	2	IKBKB	CHUK
Reactome	Interleukin-3, 5 and GM-CSF signaling	0.004866049	0.042062453	1.38E+00	4.60	2429060874	5	DUSP10	MAPK1	KRAS	RAF1	FGFR1
Reactome	RAF activation	0.004911156	0.042213873	1.37E+00	6.66	1012618254	2	KRAS	RAF1
Reactome	NCAM signaling for neurite out-growth	0.005268087	0.045028902	1.35E+00	4.55	2347873222	5	DUSP10	MAPK1	KRAS	RAF1	FGFR1
Reactome	TNFR1-induced NFkappaB signaling pathway	0.005305981	0.045100835	1.35E+00	6.58	9595092843	2	IKBKB	CHUK
Reactome	CREB phosphorylation through the activation of Ras	0.005714912	0.048308372	1.32E+00	6.51	9108776699	2	MAPK1	RAF1
Reactome	MAPK targets/ Nuclear events mediated by MAP kinases	0.007025128	0.059057399	1.23E+00	6.30	7870256792	2	MAPK8	MAPK1
Reactome	NOD1/2 Signaling Pathway	0.007489271	0.062615218	1.20E+00	6.23	7518101064	2	IKBKB	CHUK
Reactome	Regulation of TNFR1 signaling	0.007489271	0.062274918	1.21E+00	6.23	7518101064	2	IKBKB	CHUK
Reactome	EPH-Ephrin signaling	0.007493598	0.061974084	1.21E+00	5.20	3679478327	3	KDR	ADAM10	VEGFA
Reactome	L1CAM interactions	0.007712199	0.063439055	1.20E+00	5.18	3619755902	3	MAPK1	ITGA5	FGFR1
Reactome	Cellular response to heat stress	0.007712199	0.063099809	1.20E+00	5.18	3619755902	3	MAPK1	SIRT1	MTOR
Reactome	Negative regulation of FGFR1 signaling	0.007966916	0.064837135	1.19E+00	6.17	7191157467	2	MAPK1	FGFR1
Reactome	Downstream TCR signaling	0.008390513	0.067923202	1.17E+00	5.11	3449245014	3	IKBKB	CHUK	PTEN
Reactome	Cell surface interactions at the vascular wall	0.008861623	0.071359385	1.15E+00	5.06	3342309297	3	KRAS	MIF	ITGA5
Reactome	EPHA-mediated growth cone collapse	0.008962237	0.071791743	1.14E+00	6.05	6603270869	2	KDR	VEGFA
Reactome	Post NMDA receptor activation events	0.009479678	0.075541185	1.12E+00	5.99	6338237975	2	MAPK1	RAF1
Reactome	Gastrin-CREB signalling pathway via PKC and MAPK	0.009679343	0.076732616	1.12E+00	3.94	1533651207	6	APP	DUSP10	MAPK1	KRAS	RAF1	FGFR1
Reactome	Platelet degranulation	0.009849672	0.077680406	1.11E+00	4.97	3143072848	3	APP	HGF	VEGFA
Reactome	Signaling by FGFR1 in disease	0.011109726	0.087168617	1.06E+00	5.82	5639015497	2	KRAS	FGFR1
Reactome	Response to elevated platelet cytosolic Ca2+	0.011171636	0.087207155	1.06E+00	4.87	2918426787	3	APP	HGF	VEGFA
Reactome	Activation of NMDA receptor upon glutamate binding and postsynaptic events	0.011678599	0.090701811	1.04E+00	5.76	543345207	2	MAPK1	RAF1
Reactome	Epigenetic regulation of gene expression	0.012591366	0.097296922	1.01E+00	4.76	2717232243	3	KAT2B	HDAC2	SIRT1
Reactome	Pre-NOTCH Transcription and Translation	0.012853949	0.098826845	1.01E+00	5.66	5057031586	2	KAT2B	CCND1
Reactome	TNF signaling	0.012853949	0.09833271	1.01E+00	5.66	5057031586	2	IKBKB	CHUK
Reactome	TCR signaling	0.013490599	0.102689631	9.88E-01	4.70	2606393607	3	IKBKB	CHUK	PTEN
Reactome	Transcriptional activity of SMAD2/SMAD3:SMAD4 heterotrimer	0.014709297	0.111412001	9.53E-01	5.51	4566315529	2	NCOR2	CCNT2
Reactome	Chromatin organization	0.01515902	0.114252716	9.42E-01	4.14	1765343242	4	NCOR2	KAT2B	HDAC2	CCND1
Reactome	Chromatin modifying enzymes	0.01515902	0.113692654	9.44E-01	4.14	1765343242	4	NCOR2	KAT2B	HDAC2	CCND1
Reactome	NRAGE signals death through JNK	0.015351921	0.114577753	9.41E-01	5.47	4419592226	2	MAPK8	BCL2L11
Reactome	Signaling by ERBB2	0.015351921	0.114021551	9.43E-01	5.47	4419592226	2	AKT3	KRAS
Reactome	S Phase	0.015396635	0.113801213	9.44E-01	4.59	2404151105	3	WEE1	CCND1	RAD21
Reactome	RNA Polymerase I Transcription Initiation	0.016672774	0.122641082	9.11E-01	5.37	4147900871	2	KAT2B	HDAC2
Reactome	Death Receptor Signalling	0.017350786	0.127017719	8.96E-01	5.33	402194191	2	IKBKB	CHUK
Reactome	APOBEC3G mediated resistance to HIV-1 infection	0.02082625	0.151734108	8.19E-01	7.53	1843590983	1	HMGA1
Reactome	Loss of Function of FBXW7 in Cancer and NOTCH1 Signaling	0.02082625	0.151014989	8.21E-01	7.53	1843590983	1	FBXW7
Reactome	FBXW7 Mutants and NOTCH1 in Cancer	0.02082625	0.150302654	8.23E-01	7.53	1843590983	1	FBXW7
Reactome	Activation of RAS in B cells	0.02082625	0.149597008	8.25E-01	7.53	1843590983	1	KRAS
Reactome	G2/M DNA replication checkpoint	0.02082625	0.148897956	8.27E-01	7.53	1843590983	1	WEE1
Reactome	Pre-NOTCH Expression and Processing	0.023961322	0.170515457	7.68E-01	4.96	3117221648	2	KAT2B	CCND1
Reactome	Fibronectin matrix formation	0.024939792	0.176656862	7.53E-01	7.19	1464797884	1	ITGA5
Reactome	RSK activation	0.024939792	0.175842775	7.55E-01	7.19	1464797884	1	MAPK1
Reactome	PTK6 Regulates Cell Cycle	0.024939792	0.175036157	7.57E-01	7.19	1464797884	1	CCND1
Reactome	FGFR1b ligand binding and activation	0.024939792	0.174236905	7.59E-01	7.19	1464797884	1	FGFR1
Reactome	HDACs deacetylate histones	0.02636011	0.183322585	7.37E-01	4.85	2885637609	2	NCOR2	HDAC2
Reactome	Cell death signalling via NRAGE, NRIF and NADE	0.027180524	0.188172857	7.25E-01	4.81	28144064	2	MAPK8	BCL2L11
Reactome	Signaling by FGFR in disease	0.028851983	0.198844747	7.01E-01	4.74	2679952048	2	KRAS	FGFR1
Reactome	Nectin/Necl trans heterodimerization	0.02903626	0.199217387	7.01E-01	6.91	1203812889	1	CADM1
Reactome	Binding of TCF/LEF:CTNNB1 to target gene promoters	0.02903626	0.198328024	7.03E-01	6.91	1203812889	1	AXIN2
Reactome	2-LTR circle formation	0.02903626	0.197446566	7.05E-01	6.91	1203812889	1	HMGA1
Reactome	Signaling by NOTCH1 t(7	2020-07-01	0.02903626	1.54E+00	5.09	3401360544	2	1203812889	ADAM10
Reactome	Constitutive Signaling by NOTCH1 t(7	2020-07-01	0.02903626	1.54E+00	5.09	3401360544	2	1203812889	ADAM10
Reactome	Activation of NF-kappaB in B cells	0.031434286	0.210940603	6.76E-01	4.64	2496288652	2	IKBKB	CHUK
Reactome	Integrin cell surface interactions	0.032314698	0.215901693	6.66E-01	4.61	2439398088	2	KDR	ITGA5
Reactome	Macroautophagy	0.032314698	0.21496299	6.68E-01	4.61	2439398088	2	TSC1	MTOR
Reactome	Signaling by PTK6	0.032314698	0.214032415	6.70E-01	4.61	2439398088	2	CCND1	KRAS
Reactome	Cleavage of the damaged pyrimidine	0.033115722	0.218392477	6.61E-01	6.66	1014210453	1	UNG
Reactome	Recognition and association of DNA glycosylase with site containing an affected pyrimidine	0.033115722	0.217455171	6.63E-01	6.66	1014210453	1	UNG
Reactome	Depyrimidination	0.033115722	0.216525875	6.64E-01	6.66	1014210453	1	UNG
Reactome	Axonal growth inhibition (RHOA activation)	0.033115722	0.215604488	6.66E-01	6.66	1014210453	1	ARHGDIA
Reactome	Activation of PUMA and translocation to mitochondria	0.033115722	0.21469091	6.68E-01	6.66	1014210453	1	TP63
Reactome	Synthesis of PG	0.033115722	0.213785041	6.70E-01	6.66	1014210453	1	CDS2
Reactome	Formyl peptide receptors bind formyl peptides and many other ligands	0.033115722	0.212886785	6.72E-01	6.66	1014210453	1	APP
Reactome	Amyloid fiber formation	0.033204773	0.212566118	6.73E-01	4.58	2384496958	2	BACE1	APP
Reactome	Cyclin E associated events during G1/S transition	0.033204773	0.211680426	6.74E-01	4.58	2384496958	2	WEE1	CCND1
Reactome	Cyclin A:Cdk2-associated events at S phase entry	0.034104416	0.216513512	6.65E-01	4.54	2331489582	2	WEE1	CCND1
Reactome	Displacement of DNA glycosylase by APEX1	0.037178249	0.235052565	6.29E-01	6.44	8709077768	1	UNG
Reactome	Cohesin Loading onto Chromatin	0.037178249	0.234085271	6.31E-01	6.44	8709077768	1	RAD21
Reactome	Integration of provirus	0.037178249	0.233125905	6.32E-01	6.44	8709077768	1	HMGA1
Reactome	p75NTR regulates axonogenesis	0.037178249	0.232174371	6.34E-01	6.44	8709077768	1	ARHGDIA
Reactome	AKT phosphorylates targets in the nucleus	0.037178249	0.231230572	6.36E-01	6.44	8709077768	1	AKT3
Reactome	MAPK1 (ERK2) activation	0.037178249	0.230294416	6.38E-01	6.44	8709077768	1	MAPK1
Reactome	EGFR Transactivation by Gastrin	0.037178249	0.22936581	6.39E-01	6.44	8709077768	1	KRAS
Reactome	Positive epigenetic regulation of rRNA expression	0.037796801	0.232245407	6.34E-01	4.42	2136680233	2	KAT2B	HDAC2
Reactome	Signaling by TGF-beta Receptor Complex	0.037796801	0.231316425	6.36E-01	4.42	2136680233	2	NCOR2	CCNT2
Reactome	Negative epigenetic regulation of rRNA expression	0.040662013	0.247860079	6.06E-01	4.33	2006554488	2	HDAC2	SIRT1
Reactome	RNA Polymerase I Promoter Clearance	0.040662013	0.246876508	6.08E-01	4.33	2006554488	2	KAT2B	HDAC2
Reactome	GP1b-IX-V activation signalling	0.041223909	0.249298741	6.03E-01	6.25	7592230631	1	RAF1
Reactome	Base-Excision Repair, AP Site Formation	0.041223909	0.24831725	6.05E-01	6.25	7592230631	1	UNG
Reactome	Establishment of Sister Chromatid Cohesion	0.041223909	0.247343457	6.07E-01	6.25	7592230631	1	RAD21
Reactome	Regulation of signaling by NODAL	0.041223909	0.246377271	6.08E-01	6.25	7592230631	1	ACVR2A
Reactome	Signal attenuation	0.041223909	0.245418605	6.10E-01	6.25	7592230631	1	MAPK1
Reactome	Regulation of gene expression by Hypoxia-inducible Factor	0.041223909	0.24446737	6.12E-01	6.25	7592230631	1	VEGFA
Reactome	Signaling by FGFR3 fusions in cancer	0.041223909	0.24352348	6.13E-01	6.25	7592230631	1	KRAS
Reactome	RNA Polymerase I Transcription	0.043606727	0.256608817	5.91E-01	4.24	1888212086	2	KAT2B	HDAC2
Reactome	Regulation of HSF1-mediated heat shock response	0.04460555	0.261480813	5.83E-01	4.21	1851129153	2	MAPK1	SIRT1
Reactome	Uptake and function of anthrax toxins	0.045252773	0.264262375	5.78E-01	6.07	6700197693	1	MAP2K4
Reactome	Interleukin-7 signaling	0.045252773	0.263257575	5.80E-01	6.07	6700197693	1	HGF
Reactome	Signaling by NOTCH3	0.045252773	0.262260388	5.81E-01	6.07	6700197693	1	ADAM10
Reactome	Signaling by NOTCH4	0.045252773	0.261270726	5.83E-01	6.07	6700197693	1	ADAM10
Reactome	FGFR1c ligand binding and activation	0.045252773	0.260288505	5.85E-01	6.07	6700197693	1	FGFR1
Reactome	Signaling by activated point mutants of FGFR1	0.045252773	0.259313642	5.86E-01	6.07	6700197693	1	FGFR1
Reactome	Signaling by FGFR4 in disease	0.045252773	0.258346054	5.88E-01	6.07	6700197693	1	KRAS
Reactome	DSCAM interactions	0.045252773	0.257385659	5.89E-01	6.07	6700197693	1	MAPK8
Reactome	PI5P, PP2A and IER3 Regulate PI3K/AKT Signaling	0.047652552	0.270031127	5.69E-01	4.13	1746310441	2	MAPK1	FGFR1
Reactome	TP53 Regulates Transcription of Caspase Activators and Caspases	0.049264908	0.278137671	5.56E-01	5.90	5973300123	1	TP63
Reactome	TP53 Regulates Transcription of Death Receptors and Ligands	0.049264908	0.277115106	5.57E-01	5.90	5973300123	1	TP63
Reactome	Chk1/Chk2(Cds1) mediated inactivation of Cyclin B:Cdk1 complex	0.049264908	0.276100032	5.59E-01	5.90	5973300123	1	WEE1
Reactome	The NLRP3 inflammasome	0.049264908	0.275092368	5.61E-01	5.90	5973300123	1	APP
Reactome	ERKs are inactivated	0.049264908	0.274092032	5.62E-01	5.90	5973300123	1	MAPK1
Reactome	Mitotic Telophase/Cytokinesis	0.053260383	0.295247774	5.30E-01	5.75	5370993609	1	RAD21
Reactome	Signaling by Activin	0.053260383	0.294181898	5.31E-01	5.75	5370993609	1	ACVR2A
Reactome	NICD traffics to nucleus	0.053260383	0.29312369	5.33E-01	5.75	5370993609	1	KAT2B
Reactome	Notch-HLH transcription pathway	0.053260383	0.292073067	5.35E-01	5.75	5370993609	1	KAT2B
Reactome	p75NTR recruits signalling complexes	0.053260383	0.291029949	5.36E-01	5.75	5370993609	1	IKBKB
Reactome	NF-kB is activated and signals survival	0.053260383	0.289994255	5.38E-01	5.75	5370993609	1	IKBKB
Reactome	Downregulation of ERBB2:ERBB3 signaling	0.053260383	0.288965907	5.39E-01	5.75	5370993609	1	AKT3
Reactome	p38MAPK events	0.053260383	0.287944826	5.41E-01	5.75	5370993609	1	KRAS
Reactome	DEx/H-box helicases activate type I IFN and inflammatory cytokines production	0.053260383	0.286930936	5.42E-01	5.75	5370993609	1	APP
Reactome	Repression of WNT target genes	0.057239266	0.307284483	5.12E-01	5.60	4864821668	1	AXIN2
Reactome	Early Phase of HIV Life Cycle	0.057239266	0.306210061	5.14E-01	5.60	4864821668	1	HMGA1
Reactome	TP53 regulates transcription of several additional cell death genes whose specific roles in p53-dependent apoptosis remain uncertain	0.057239266	0.305143127	5.15E-01	5.60	4864821668	1	TP63
Reactome	Receptor-ligand binding initiates the second proteolytic cleavage of Notch receptor	0.057239266	0.304083603	5.17E-01	5.60	4864821668	1	ADAM10
Reactome	Golgi Cisternae Pericentriolar Stack Reorganization	0.057239266	0.30303141	5.19E-01	5.60	4864821668	1	MAPK1
Reactome	Constitutive Signaling by NOTCH1 HD Domain Mutants	0.061201626	0.322891339	4.91E-01	5.47	4434256372	1	ADAM10
Reactome	Signaling by NOTCH1 HD Domain Mutants in Cancer	0.061201626	0.321781747	4.92E-01	5.47	4434256372	1	ADAM10
Reactome	NRIF signals cell death from the nucleus	0.061201626	0.320679755	4.94E-01	5.47	4434256372	1	MAPK8
Reactome	FGFR1 ligand binding and activation	0.061201626	0.319585285	4.95E-01	5.47	4434256372	1	FGFR1
Reactome	Signaling by EGFRvIII in Cancer	0.061201626	0.31849826	4.97E-01	5.47	4434256372	1	KRAS
Reactome	Constitutive Signaling by EGFRvIII	0.061201626	0.317418605	4.98E-01	5.47	4434256372	1	KRAS
Reactome	CLEC7A (Dectin-1) signaling	0.065097909	0.336485814	4.73E-01	3.72	1314027344	2	IKBKB	CHUK
Reactome	Resolution of Sister Chromatid Cohesion	0.065097909	0.335352865	4.74E-01	3.72	1314027344	2	RAD21	MAPRE1
Reactome	Rap1 signalling	0.065147531	0.334482288	4.76E-01	5.34	4064138213	1	RAF1
Reactome	p75NTR signals via NF-kB	0.065147531	0.333363618	4.77E-01	5.34	4064138213	1	IKBKB
Reactome	Spry regulation of FGF signaling	0.065147531	0.332252406	4.79E-01	5.34	4064138213	1	MAPK1
Reactome	GRB2 events in ERBB2 signaling	0.065147531	0.331148578	4.80E-01	5.34	4064138213	1	KRAS
Reactome	Polo-like kinase mediated events	0.065147531	0.330052059	4.81E-01	5.34	4064138213	1	WEE1
Reactome	Protein folding	0.067409807	0.340386156	4.68E-01	3.67	1271553401	2	FBXW7	ARL2
Reactome	Synthesis, secretion, and deacylation of Ghrelin	0.069077047	0.347657504	4.59E-01	5.23	374304311	1	KLF4
Reactome	Formation of Senescence-Associated Heterochromatin Foci (SAHF)	0.069077047	0.346517643	4.60E-01	5.23	374304311	1	HMGA1
Reactome	SHC-mediated cascade:FGFR3	0.072990241	0.364951207	4.38E-01	5.11	3462208368	1	KRAS
Reactome	SHC1 events in ERBB2 signaling	0.072990241	0.363762441	4.39E-01	5.11	3462208368	1	KRAS
Reactome	Tie2 Signaling	0.072990241	0.362581394	4.41E-01	5.11	3462208368	1	KRAS
Reactome	Mitotic Prometaphase	0.07450554	0.368910927	4.33E-01	3.53	1155710633	2	RAD21	MAPRE1
Reactome	TP53 Regulates Transcription of Genes Involved in Cytochrome C Release	0.076887182	0.379475447	4.21E-01	5.01	3214807142	1	TP63
Reactome	Signaling by NODAL	0.076887182	0.378255269	4.22E-01	5.01	3214807142	1	ACVR2A
Reactome	Constitutive Signaling by Ligand-Responsive EGFR Cancer Variants	0.076887182	0.377042912	4.24E-01	5.01	3214807142	1	KRAS
Reactome	Signaling by Ligand-Responsive EGFR Variants in Cancer	0.076887182	0.375838302	4.25E-01	5.01	3214807142	1	KRAS
Reactome	Signaling by EGFR in Cancer	0.076887182	0.374641365	4.26E-01	5.01	3214807142	1	KRAS
Reactome	FCERI mediated NF-kB activation	0.079363456	0.385479645	4.14E-01	3.44	1086965793	2	IKBKB	CHUK
Reactome	G1/S Transition	0.080593198	0.390213903	4.09E-01	3.42	1070723224	2	WEE1	CCND1
Reactome	Signaling by Hippo	0.080767935	0.389826312	4.09E-01	4.90	2995446705	1	YAP1
Reactome	Regulation of gene expression in beta cells	0.080767935	0.388600443	4.10E-01	4.90	2995446705	1	AKT3
Reactome	NOTCH2 Activation and Transmission of Signal to the Nucleus	0.084632568	0.405917957	3.92E-01	4.81	2799814204	1	ADAM10
Reactome	ERK/MAPK targets	0.084632568	0.404649463	3.93E-01	4.81	2799814204	1	MAPK1
Reactome	Regulation of lipid metabolism by Peroxisome proliferator-activated receptor alpha (PPARalpha)	0.085571092	0.407862215	3.89E-01	3.34	1009198588	2	NCOR2	YAP1
Reactome	RNA Polymerase I, RNA Polymerase III, and Mitochondrial Transcription	0.085571092	0.406595562	3.91E-01	3.34	1009198588	2	KAT2B	HDAC2
Reactome	Post-chaperonin tubulin folding pathway	0.088481145	0.419121212	3.78E-01	4.71	2624421865	1	ARL2
Reactome	CTLA4 inhibitory signaling	0.088481145	0.417827628	3.79E-01	4.71	2624421865	1	AKT3
Reactome	Signaling by FGFR3 point mutants in cancer	0.088481145	0.416542005	3.80E-01	4.71	2624421865	1	KRAS
Reactome	Signaling by FGFR3 in disease	0.088481145	0.415264269	3.82E-01	4.71	2624421865	1	KRAS
Reactome	Cyclin A/B1 associated events during G2/M transition	0.088481145	0.413994347	3.83E-01	4.71	2624421865	1	WEE1
Reactome	Downregulation of SMAD2/3:SMAD4 transcriptional activity	0.092313733	0.430609791	3.66E-01	4.62	2466420664	1	NCOR2
Reactome	SHC-mediated cascade:FGFR4	0.092313733	0.429300947	3.67E-01	4.62	2466420664	1	KRAS
Reactome	Growth hormone receptor signaling	0.096130398	0.445695481	3.51E-01	4.54	2323462001	1	MAPK1
Reactome	Nuclear Events (kinase and transcription factor activation)	0.096130398	0.444348969	3.52E-01	4.54	2323462001	1	MAPK1
Reactome	Synthesis of IP3 and IP4 in the cytosol	0.099931205	0.460526335	3.37E-01	4.46	2193593602	1	PTEN
Reactome	M Phase	0.103188464	0.474109159	3.24E-01	2.60	6053300147	3	RAD21	MAPK1	MAPRE1
Reactome	Recycling pathway of L1	0.103716219	0.475107229	3.23E-01	4.38	2075180198	1	MAPK1
Reactome	Regulation of Hypoxia-inducible Factor (HIF) by oxygen	0.103716219	0.473688999	3.25E-01	4.38	2075180198	1	VEGFA
Reactome	Cellular response to hypoxia	0.103716219	0.47227921	3.26E-01	4.38	2075180198	1	VEGFA
Reactome	SHC-mediated cascade:FGFR2	0.103716219	0.470877788	3.27E-01	4.38	2075180198	1	KRAS
Reactome	PTK6 Regulates RHO GTPases, RAS GTPase and MAP kinases	0.103716219	0.469484659	3.28E-01	4.38	2075180198	1	KRAS
Reactome	Cell-Cell communication	0.105013288	0.473953777	3.24E-01	3.03	8192178791	2	MAPK8	CADM1
Reactome	Uptake and actions of bacterial toxins	0.107485504	0.48368477	3.15E-01	4.30	1966842401	1	MAP2K4
Reactome	RORA activates gene expression	0.107485504	0.482266339	3.17E-01	4.30	1966842401	1	SIRT1
Reactome	Cardiac conduction	0.110385541	0.493830052	3.06E-01	2.96	7773460753	2	KAT2B	HIPK1
Reactome	Ca-dependent events	0.111239127	0.496197853	3.04E-01	4.22	18674091	1	MAPK1
Reactome	Negative regulation of FGFR3 signaling	0.114977149	0.511380927	2.91E-01	4.15	1775880025	1	MAPK1
Reactome	Extracellular matrix organization	0.116422355	0.516307835	2.87E-01	2.44	5427891745	3	KDR	ADAM10	ITGA5
Reactome	HIV Life Cycle	0.118576546	0.524341375	2.80E-01	2.85	7200934034	2	CCNT2	HMGA1
Reactome	Activated NOTCH1 Transmits Signal to the Nucleus	0.118699637	0.52337304	2.81E-01	4.08	1691396059	1	ADAM10
Reactome	Neurotransmitter Receptor Binding And Downstream Transmission In The Postsynaptic Cell	0.119956425	0.527394625	2.78E-01	2.83	7111424314	2	MAPK1	RAF1
Reactome	Adherens junctions interactions	0.122406653	0.536625157	2.70E-01	4.01	1613215478	1	CADM1
Reactome	Negative regulation of FGFR4 signaling	0.122406653	0.535091942	2.72E-01	4.01	1613215478	1	MAPK1
Reactome	FGFR1 mutant receptor activation	0.122406653	0.533567464	2.73E-01	4.01	1613215478	1	FGFR1
Reactome	Thrombin signalling through proteinase activated receptors (PARs)	0.126098262	0.548097558	2.61E-01	3.95	1540694807	1	MAPK1
Reactome	Regulation of beta-cell development	0.126098262	0.546544874	2.62E-01	3.95	1540694807	1	AKT3
Reactome	Vpr-mediated nuclear import of PICs	0.126098262	0.545000962	2.64E-01	3.95	1540694807	1	HMGA1
Reactome	HIV elongation arrest and recovery	0.126098262	0.543465748	2.65E-01	3.95	1540694807	1	CCNT2
Reactome	Pausing and recovery of HIV elongation	0.126098262	0.541939159	2.66E-01	3.95	1540694807	1	CCNT2
Reactome	Elongation arrest and recovery	0.126098262	0.540421122	2.67E-01	3.95	1540694807	1	CCNT2
Reactome	Signaling by NOTCH2	0.126098262	0.538911565	2.68E-01	3.95	1540694807	1	ADAM10
Reactome	SMAD2/SMAD3:SMAD4 heterotrimer regulates transcription	0.126098262	0.537410419	2.70E-01	3.95	1540694807	1	CCNT2
Reactome	Synthesis of PIPs at the plasma membrane	0.133435507	0.567100907	2.46E-01	3.82	141046009	1	PTEN
Reactome	HSF1-dependent transactivation	0.133435507	0.56552999	2.48E-01	3.82	141046009	1	MTOR
Reactome	Negative regulation of FGFR2 signaling	0.133435507	0.563967752	2.49E-01	3.82	141046009	1	MAPK1
Reactome	Lysosome Vesicle Biogenesis	0.137081271	0.577780562	2.38E-01	3.76	1351824023	1	APP
Reactome	Interactions of Vpr with host cellular proteins	0.137081271	0.576193253	2.39E-01	3.76	1351824023	1	HMGA1
Reactome	SIRT1 negatively regulates rRNA Expression	0.137081271	0.574614641	2.41E-01	3.76	1351824023	1	SIRT1
Reactome	Base Excision Repair	0.137081271	0.573044656	2.42E-01	3.76	1351824023	1	UNG
Reactome	Resolution of Abasic Sites (AP sites)	0.137081271	0.571483226	2.43E-01	3.76	1351824023	1	UNG
Reactome	RHO GTPases Activate WASPs and WAVEs	0.140711877	0.585024925	2.33E-01	3.70	1296984724	1	MAPK1
Reactome	Phospholipid metabolism	0.146879872	0.609014102	2.15E-01	2.50	5673292594	2	PTEN	CDS2
Reactome	Separation of Sister Chromatids	0.148330277	0.61336574	2.12E-01	2.49	5609388274	2	RAD21	MAPRE1
Reactome	Association of TriC/CCT with target proteins during biosynthesis	0.151513381	0.624839548	2.04E-01	3.53	1152064308	1	FBXW7
Reactome	Collagen degradation	0.151513381	0.623159872	2.05E-01	3.53	1152064308	1	ADAM10
Reactome	Nuclear signaling by ERBB4	0.151513381	0.621489202	2.07E-01	3.53	1152064308	1	YAP1
Reactome	Elastic fibre formation	0.158639735	0.648980736	1.88E-01	3.42	1069175066	1	ITGA5
Reactome	Transcriptional regulation of pluripotent stem cells	0.162180702	0.661697265	1.79E-01	3.37	1031204149	1	KLF4
Reactome	Deactivation of the beta-catenin transactivating complex	0.162180702	0.659937432	1.80E-01	3.37	1031204149	1	SOX6
Reactome	Mitotic Anaphase	0.164470412	0.667479391	1.76E-01	2.31	4968413407	2	RAD21	MAPRE1
Reactome	G2/M Transition	0.164470412	0.665713573	1.77E-01	2.31	4968413407	2	WEE1	MAPRE1
Reactome	Metabolism of proteins	0.164542593	0.664248461	1.78E-01	1.49	2800412509	7	BACE1	APP	FBXW7	RAD21	ARL2	HDGF	KLF4
Reactome	TP53 Regulates Transcription of Cell Death Genes	0.165706943	0.667188482	1.76E-01	3.32	9953125428	1	TP63
Reactome	ERCC6 (CSB) and EHMT2 (G9a) positively regulate rRNA expression	0.165706943	0.665437332	1.77E-01	3.32	9953125428	1	HDAC2
Reactome	Signaling by FGFR2 in disease	0.165706943	0.663695349	1.78E-01	3.32	9953125428	1	KRAS
Reactome	Mitotic Metaphase and Anaphase	0.16595333	0.662946724	1.79E-01	2.30	491529467	2	RAD21	MAPRE1
Reactome	Mitotic G2-G2/M phases	0.167438652	0.667138378	1.76E-01	2.28	4862961234	2	WEE1	MAPRE1
Reactome	PLC beta mediated events	0.169218519	0.67247879	1.72E-01	3.27	9613443656	1	MAPK1
Reactome	Inositol phosphate metabolism	0.169218519	0.670736617	1.73E-01	3.27	9613443656	1	PTEN
Reactome	Formation of HIV elongation complex in the absence of HIV Tat	0.169218519	0.669003447	1.75E-01	3.27	9613443656	1	CCNT2
Reactome	RNA Polymerase II Transcription Elongation	0.169218519	0.667279211	1.76E-01	3.27	9613443656	1	CCNT2
Reactome	Formation of RNA Pol II elongation complex	0.169218519	0.665563841	1.77E-01	3.27	9613443656	1	CCNT2
Reactome	G-protein mediated events	0.172715489	0.677576151	1.69E-01	3.22	9291585227	1	MAPK1
Reactome	RMTs methylate histone arginines	0.172715489	0.67584322	1.70E-01	3.22	9291585227	1	CCND1
Reactome	Signaling by GPCR	0.175133726	0.683557657	1.65E-01	1.36	2566501596	8	APP	RGS5	DUSP10	AKT3	MAPK1	KRAS	RAF1	FGFR1
Reactome	Phospholipase C-mediated cascade: FGFR1	0.179665855	0.699462488	1.55E-01	3.12	869633493	1	FGFR1
Reactome	Infectious disease	0.18010157	0.699379193	1.55E-01	1.81	3518543328	3	MAP2K4	CCNT2	HMGA1
Reactome	EPH-ephrin mediated repulsion of cells	0.183119369	0.709297809	1.49E-01	3.07	8420719488	1	ADAM10
Reactome	G beta:gamma signalling through PI3Kgamma	0.183119369	0.707506653	1.50E-01	3.07	8420719488	1	AKT3
Reactome	Ubiquitin-dependent degradation of Cyclin D1	0.189983357	0.732177673	1.35E-01	2.98	790866098	1	CCND1
Reactome	Ubiquitin-dependent degradation of Cyclin D	0.189983357	0.73033803	1.36E-01	2.98	790866098	1	CCND1
Reactome	G-protein beta:gamma signalling	0.193393948	0.741585817	1.30E-01	2.94	7670522816	1	AKT3
Reactome	Nuclear Receptor transcription pathway	0.193393948	0.739731853	1.31E-01	2.94	7670522816	1	ESR2
Reactome	Muscle contraction	0.199107688	0.759687687	1.19E-01	1.97	3921062817	2	KAT2B	HIPK1
Reactome	GPVI-mediated activation cascade	0.200172619	0.761851014	1.18E-01	2.85	722630363	1	AKT3
Reactome	XBP1(S) activates chaperone genes	0.200172619	0.759960565	1.19E-01	2.85	722630363	1	HDGF
Reactome	Signaling by Rho GTPases	0.200262577	0.758420156	1.20E-01	1.65	3129867434	3	ARHGDIA	MAPK1	MAPRE1
Reactome	Degradation of AXIN	0.203540815	0.768931969	1.14E-01	2.81	7018909736	1	AXIN2
Reactome	TCF dependent signaling in response to WNT	0.203693654	0.767614017	1.15E-01	1.93	3807461374	2	AXIN2	SOX6
Reactome	IRE1alpha activates chaperones	0.206894995	0.777762513	1.09E-01	2.77	6820536293	1	HDGF
Reactome	Meiotic synapsis	0.213561538	0.800855768	9.64E-02	2.69	6448747925	1	RAD21
Reactome	Formation of the beta-catenin:TCF transactivating complex	0.216874015	0.811289104	9.08E-02	2.65	6274378769	1	AXIN2
Reactome	B-WICH complex positively regulates rRNA expression	0.216874015	0.80931035	9.19E-02	2.65	6274378769	1	KAT2B
Reactome	Recruitment and ATM-mediated phosphorylation of repair and signaling proteins at DNA double strand breaks	0.216874015	0.807341225	9.29E-02	2.65	6274378769	1	MAPK8
Reactome	NIK-->noncanonical NF-kB signaling	0.216874015	0.805381659	9.40E-02	2.65	6274378769	1	CHUK
Reactome	DNA Damage/Telomere Stress Induced Senescence	0.220172706	0.815651913	8.85E-02	2.61	6107114662	1	HMGA1
Reactome	DNA Double Strand Break Response	0.220172706	0.81368174	8.95E-02	2.61	6107114662	1	MAPK8
Reactome	The role of GTSE1 in G2/M progression after G2 checkpoint	0.220172706	0.811721061	9.06E-02	2.61	6107114662	1	MAPRE1
Reactome	SCF(Skp2)-mediated degradation of p27/p21	0.220172706	0.809769808	9.16E-02	2.61	6107114662	1	CCND1
Reactome	Transmission across Chemical Synapses	0.222149853	0.815082196	8.88E-02	1.76	3395177408	2	MAPK1	RAF1
Reactome	PI Metabolism	0.223457667	0.81791921	8.73E-02	2.57	5946560692	1	PTEN
Reactome	Translocation of GLUT4 to the plasma membrane	0.223457667	0.815967136	8.83E-02	2.57	5946560692	1	RAB14
Reactome	Cell-cell junction organization	0.226728953	0.825941188	8.31E-02	2.53	5792349775	1	CADM1
Reactome	Ca2+ pathway	0.226728953	0.823979332	8.41E-02	2.53	5792349775	1	AXIN2
Reactome	TP53 Regulates Transcription of DNA Repair Genes	0.226728953	0.822026775	8.51E-02	2.53	5792349775	1	CCNT2
Reactome	Constitutive Signaling by Aberrant PI3K in Cancer	0.226728953	0.820083449	8.61E-02	2.53	5792349775	1	FGFR1
Reactome	Dectin-1 mediated noncanonical NF-kB signaling	0.226728953	0.81814929	8.72E-02	2.53	5792349775	1	CHUK
Reactome	Fatty acid, triacylglycerol, and ketone body metabolism	0.231431719	0.833154188	7.93E-02	1.68	3211477727	2	NCOR2	YAP1
Reactome	Circadian Clock	0.233230731	0.837659669	7.69E-02	2.46	5501613955	1	SIRT1
Reactome	RNA Polymerase II Pre-transcription Events	0.236461334	0.847273632	7.20E-02	2.42	5364473874	1	CCNT2
Reactome	HIV Infection	0.239186755	0.855036764	6.80E-02	1.62	3068448372	2	CCNT2	HMGA1
Reactome	Transcription of the HIV genome	0.246072663	0.877601804	5.67E-02	2.32	4982688024	1	CCNT2
Reactome	Regulation of RAS by GAPs	0.246072663	0.87556087	5.77E-02	2.32	4982688024	1	KRAS
Reactome	Loss of Nlp from mitotic centrosomes	0.2524137	0.896039352	4.77E-02	2.25	4750468847	1	MAPRE1
Reactome	Loss of proteins required for interphase microtubule organization?from the centrosome	0.2524137	0.893965187	4.87E-02	2.25	4750468847	1	MAPRE1
Reactome	trans-Golgi Network Vesicle Budding	0.255564428	0.903033658	4.43E-02	2.21	4640410675	1	APP
Reactome	Clathrin derived vesicle budding	0.255564428	0.900952936	4.53E-02	2.21	4640410675	1	APP
Reactome	AURKA Activation by TPX2	0.261826573	0.920907256	3.58E-02	2.15	4431458102	1	MAPRE1
Reactome	NoRC negatively regulates rRNA expression	0.264938098	0.929713968	3.17E-02	2.12	4332221371	1	HDAC2
Reactome	G alpha (i) signalling events	0.267193191	0.935481883	2.90E-02	1.39	2618617697	2	APP	RGS5
Reactome	SUMOylation of DNA damage response and repair proteins	0.271122322	0.947071123	2.36E-02	2.05	4143445044	1	RAD21
Reactome	RNA polymerase II transcribes snRNA genes	0.27725513	0.966287811	1.49E-02	1.99	3966657853	1	CCNT2
Reactome	G2/M DNA damage checkpoint	0.280302386	0.974687842	1.11E-02	1.96	3882436841	1	WEE1
Reactome	Centrosome maturation	0.283336946	0.983005731	7.44E-03	1.93	3800839264	1	MAPRE1
Reactome	Recruitment of mitotic centrosome proteins and complexes	0.283336946	0.980781736	8.43E-03	1.93	3800839264	1	MAPRE1
Reactome	Regulation of insulin secretion	0.286358863	0.98900465	4.80E-03	1.90	3721754434	1	ARL2
Reactome	Peptide hormone metabolism	0.289368188	0.997147135	1.24E-03	1.87	3645077584	1	KLF4
Reactome	Opioid Signalling	0.289368188	0.994906355	2.22E-03	1.87	3645077584	1	MAPK1
Reactome	RHO GTPase Effectors	0.290546524	0.996717896	1.43E-03	1.21	2308107496	2	MAPK1	MAPRE1
Reactome	Degradation of beta-catenin by the destruction complex	0.292364974	1	0.00E+00	1.84	3570709481	1	AXIN2
Reactome	Antigen processing: Ubiquitination & Proteasome degradation	0.298317098	1	0.00E+00	1.15	2215381447	2	MYLIP	FBXW7
Reactome	Metabolism of lipids and lipoproteins	0.299887054	1	0.00E+00	0.80	1740515013	4	NCOR2	YAP1	PTEN	CDS2
Reactome	Meiosis	0.30128061	1	0.00E+00	1.75	3360541142	1	RAD21
Reactome	Cell junction organization	0.304227753	1	0.00E+00	1.72	3294514595	1	CADM1
Reactome	Unfolded Protein Response (UPR)	0.304227753	1	0.00E+00	1.72	3294514595	1	HDGF
Reactome	Regulation of PLK1 Activity at G2/M Transition	0.307162611	1	0.00E+00	1.69	3230372175	1	MAPRE1
Reactome	Regulation of TP53 Activity through Phosphorylation	0.312995681	1	0.00E+00	1.64	3107452885	1	HIPK1
Reactome	MAPK6/MAPK4 signaling	0.321654416	1	0.00E+00	1.55	2935500908	1	CCND3
Reactome	Chaperonin-mediated protein folding	0.330205304	1	0.00E+00	1.47	2777044326	1	FBXW7
Reactome	TNFR2 non-canonical NF-kB pathway	0.330205304	1	0.00E+00	1.47	2777044326	1	CHUK
Reactome	SUMO E3 ligases SUMOylate target proteins	0.333031863	1	0.00E+00	1.45	2726976958	1	RAD21
Reactome	Regulation of actin dynamics for phagocytic cup formation	0.335846635	1	0.00E+00	1.42	2678204875	1	MAPK1
Reactome	Anchoring of the basal body to the plasma membrane	0.335846635	1	0.00E+00	1.42	2678204875	1	MAPRE1
Reactome	DNA Repair	0.336935028	1	0.00E+00	0.86	1817652735	2	MAPK8	UNG
Reactome	Stimuli-sensing channels	0.344220717	1	0.00E+00	1.34	2539219547	1	RAF1
Reactome	SUMOylation	0.346988825	1	0.00E+00	1.32	2495197319	1	RAD21
Reactome	Glycerophospholipid biosynthesis	0.349745388	1	0.00E+00	1.29	2452263891	1	CDS2
Reactome	Signaling by Wnt	0.352224386	1	0.00E+00	0.75	168440169	2	AXIN2	SOX6
Reactome	Degradation of the extracellular matrix	0.360657129	1	0.00E+00	1.20	2290717772	1	ADAM10
Reactome	Neuronal System	0.361342506	1	0.00E+00	0.69	1610392343	2	MAPK1	RAF1
Reactome	Mitotic Prophase	0.363356672	1	0.00E+00	1.17	2252715529	1	MAPK1
Reactome	HATs acetylate histones	0.363356672	1	0.00E+00	1.17	2252715529	1	KAT2B
Reactome	Class I MHC mediated antigen processing & presentation	0.367395898	1	0.00E+00	0.64	1563333756	2	MYLIP	FBXW7
Reactome	Integration of energy metabolism	0.371387907	1	0.00E+00	1.10	2143957126	1	ARL2
Reactome	PPARA activates gene expression	0.379319018	1	0.00E+00	1.03	2042515153	1	YAP1
Reactome	RHO GTPases Activate Formins	0.381940686	1	0.00E+00	1.01	2010212938	1	MAPRE1
Reactome	Fcgamma receptor (FCGR) dependent phagocytosis	0.397442478	1	0.00E+00	0.87	1830764018	1	MAPK1
Reactome	Rho GTPase cycle	0.402523874	1	0.00E+00	0.83	1775957983	1	ARHGDIA
Reactome	RNA Polymerase II Transcription	0.407562923	1	0.00E+00	0.79	1723425393	1	CCNT2
Reactome	Late Phase of HIV Life Cycle	0.417515377	1	0.00E+00	0.70	162469104	1	CCNT2
Reactome	Host Interactions of HIV factors	0.419977566	1	0.00E+00	0.68	1601243971	1	HMGA1
Reactome	Beta-catenin independent WNT signaling	0.455699721	1	0.00E+00	0.38	1299472871	1	AXIN2
Reactome	DNA Double-Strand Break Repair	0.458002357	1	0.00E+00	0.36	1282234728	1	MAPK8
Reactome	G2/M Checkpoints	0.46937194	1	0.00E+00	0.26	1200571072	1	WEE1
Reactome	Membrane Trafficking	0.529294634	1	0.00E+00	-0.47	0.721326574	2	APP	RAB14
Reactome	Cell Cycle Checkpoints	0.536756703	1	0.00E+00	-0.30	0.813985288	1	WEE1
Reactome	Assembly of the primary cilium	0.546492228	1	0.00E+00	-0.38	0.769334343	1	MAPRE1
Reactome	G alpha (q) signalling events	0.554134851	1	0.00E+00	-0.44	0.735910258	1	APP
Reactome	Peptide ligand-binding receptors	0.557908297	1	0.00E+00	-0.47	0.719912005	1	APP
Reactome	Ion channel transport	0.576307336	1	0.00E+00	-0.63	0.646392436	1	RAF1
Reactome	Vesicle-mediated transport	0.615722865	1	0.00E+00	-1.09	0.46937506	2	APP	RAB14
Reactome	Class A/1 (Rhodopsin-like receptors)	0.746030012	1	0.00E+00	-2.21	0.215973351	1	APP
Reactome	Organelle biogenesis and maintenance	0.749268843	1	0.00E+00	-2.25	0.210821957	1	MAPRE1
Reactome	GPCR downstream signaling	0.788068317	1	0.00E+00	-2.53	0.173063868	3	APP	RGS5	AKT3
Reactome	GPCR ligand binding	0.850832495	1	0.00E+00	-3.54	0.086044531	1	APP
Reactome	Post-translational protein modification	0.891593631	1	0.00E+00	-4.25	0.052437995	1	RAD21
Reactome	Metabolism	0.912671278	1	0.00E+00	-4.13	0.057015268	5	NCOR2	YAP1	PTEN	ARL2	CDS2
Reactome	Transmembrane transport of small molecules	0.920970095	1	0.00E+00	-4.92	0.032999725	1	RAF1
