# Supplementary figures and images for: Circulating miR-16-5p, miR-92a-3p, and miR-451a in Plasma from Lung Cancer Patients: Potential Application in Early Detection and a Regulatory Role in Tumorigenesis Pathways
Source: MDPI journal article supplement (doi:10.3390/cancers12082071), 2020-07-27

Normalized by miRNA 93

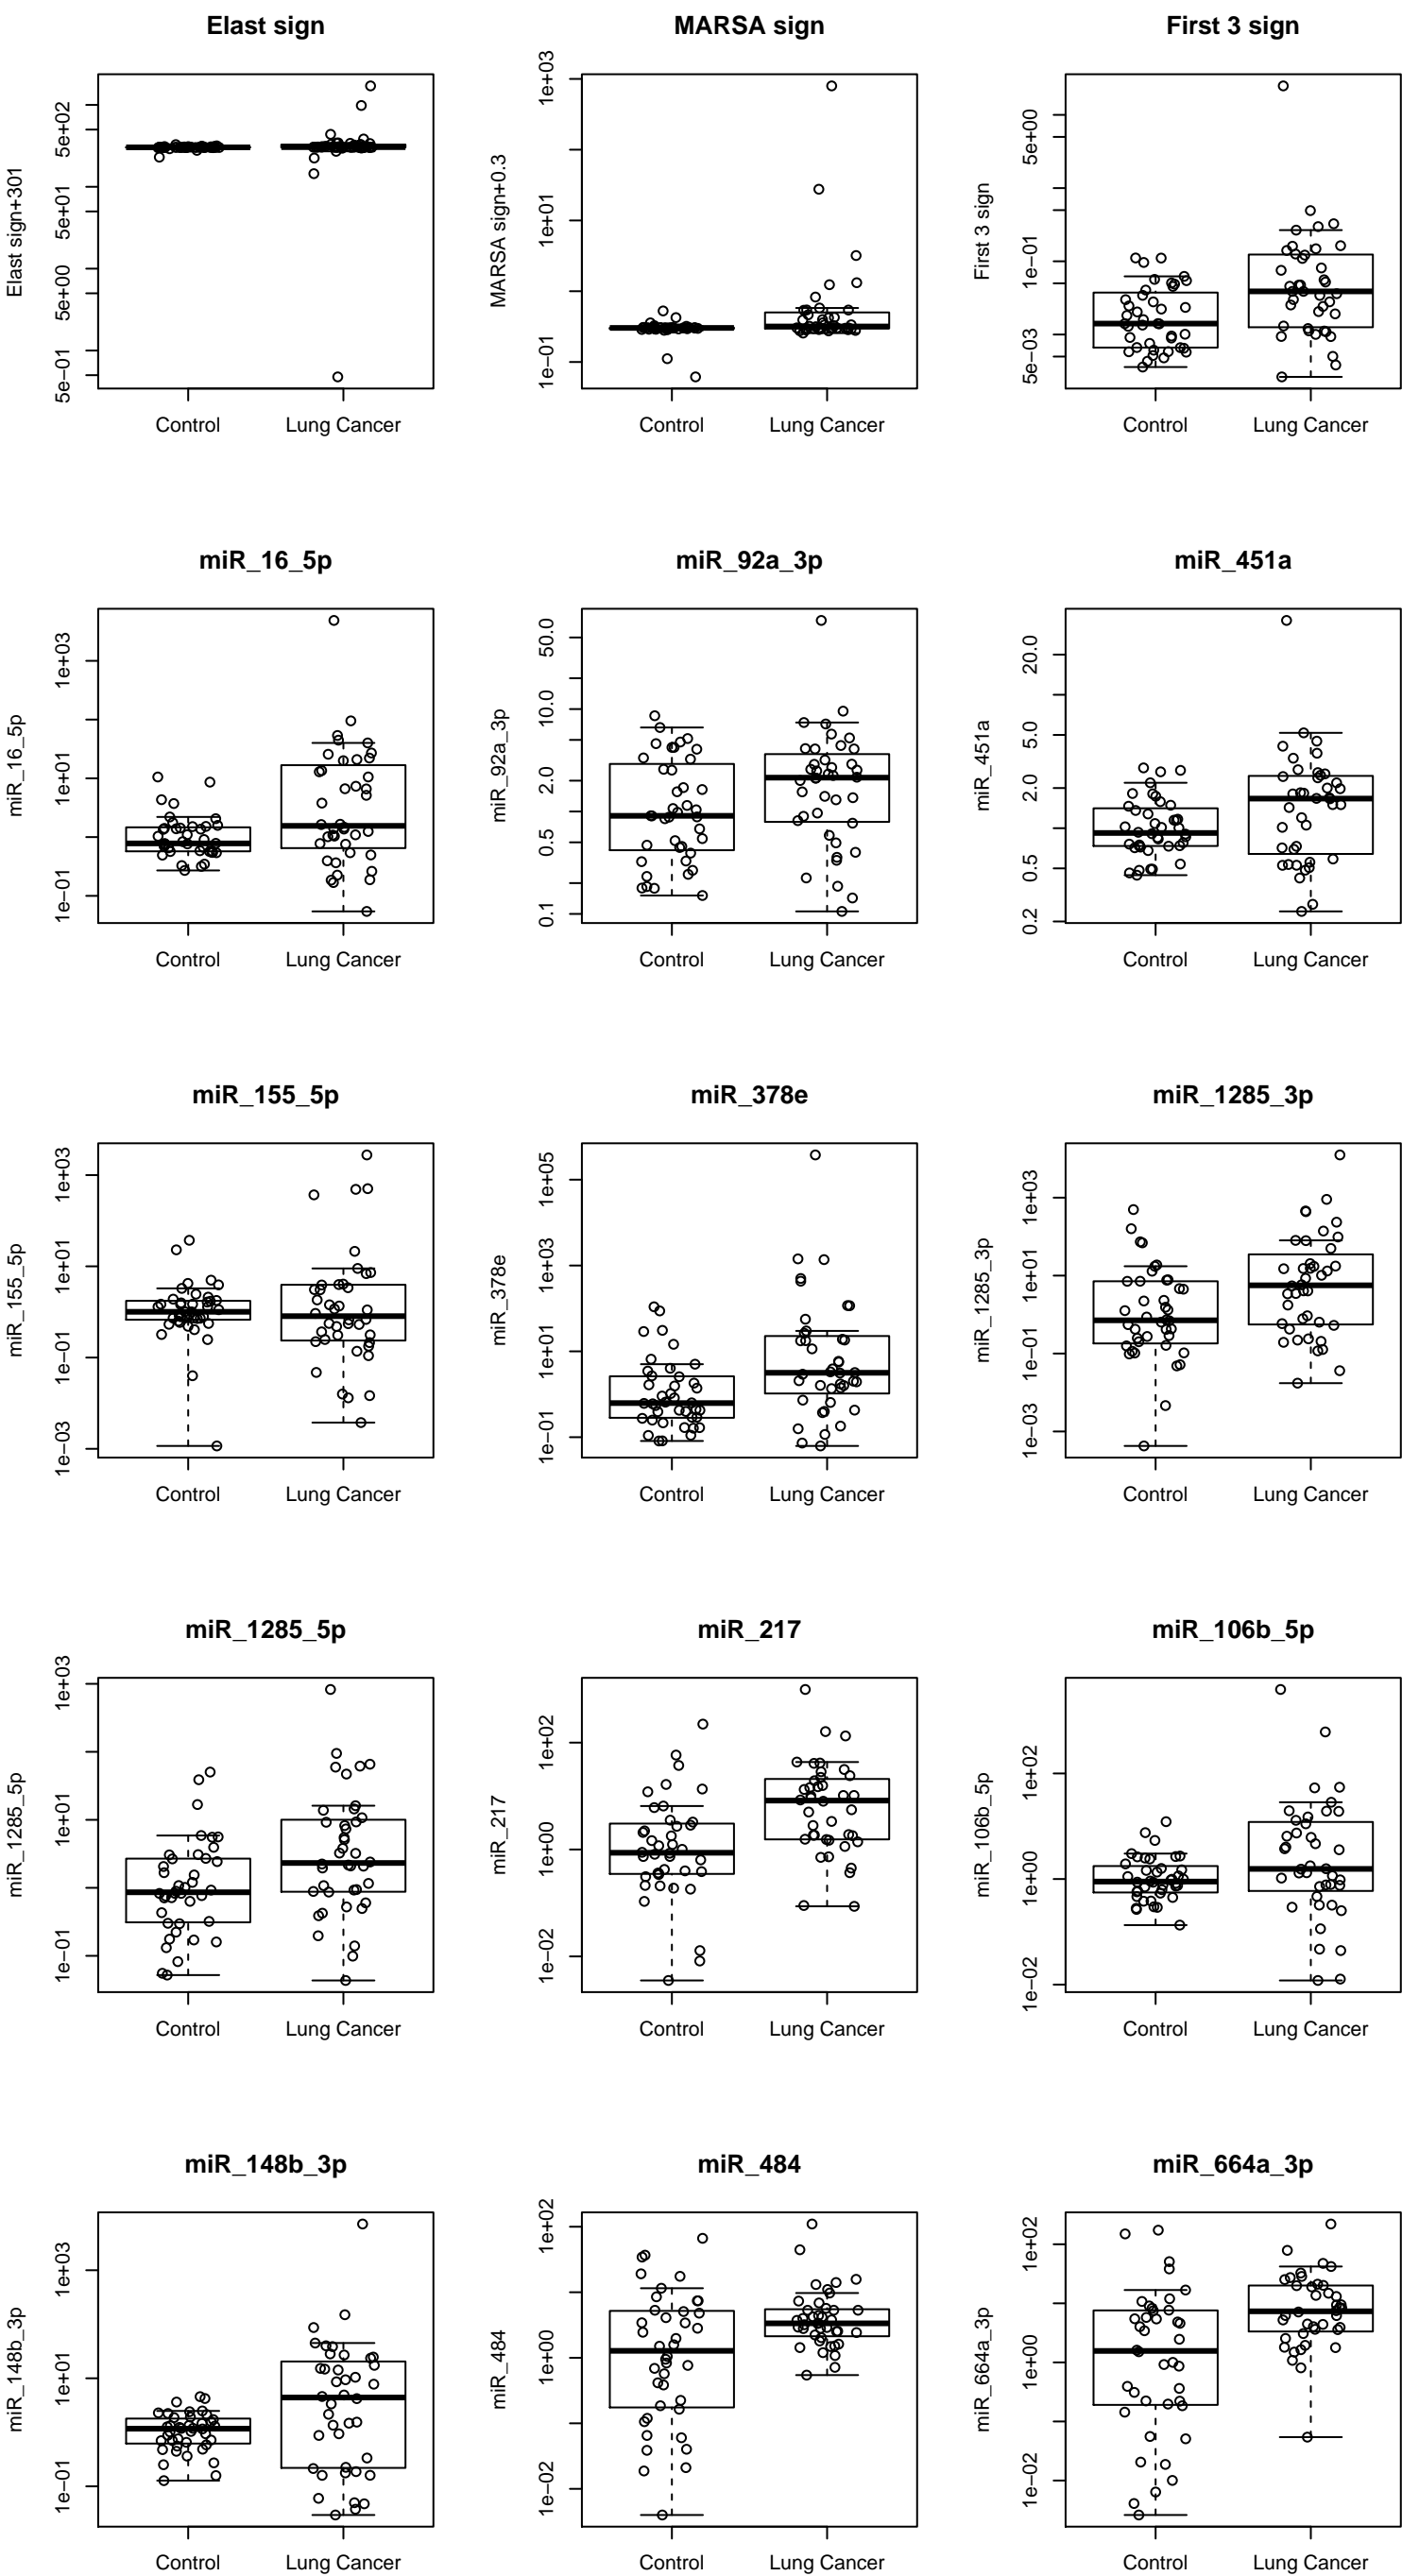

Supplement: s1 [file s1]
